# Supplementary material for: Controlling the selectivity and efficiency of the hydrogen borrowing reaction by switching between rhodium and iridium catalysts
Source: Royal Society of Chemistry journal article supplement (doi:10.1039/c9dt02819f), 2019-01-01
Supplement: c9dt02819f1.pdf [file c9dt02819f1.pdf]

# Supporting Information

for

## **Controlling the Selectivity and Efficiency of the Hydrogen Borrowing Reaction by Switching Between Rhodium and Iridium Catalysts**

Danfeng. Wang, Roy T. McBurney, Indrek Pernik,\* and Barbara A. Messerle\*

---

Department of Molecular Sciences, Macquarie University, North Ryde, Sydney, NSW 2019, (Australia)

[\*] E-mail: [barbara.messerle@mq.edu.au](mailto:barbara.messerle@mq.edu.au), [indrek.pernik@mq.edu.au](mailto:indrek.pernik@mq.edu.au)

## Contents

|                                                                                                                               |           |
|-------------------------------------------------------------------------------------------------------------------------------|-----------|
| <b>S1.1 General considerations .....</b>                                                                                      | <b>2</b>  |
| <b>S1.2 Synthesis.....</b>                                                                                                    | <b>3</b>  |
| S1.2.1 General synthetic routes of the catalysts .....                                                                        | 3         |
| S1.2.2 Synthesis of Ir-2 .....                                                                                                | 3         |
| S1.2.3 Synthesis of Ir-3 .....                                                                                                | 4         |
| S1.2.4 Synthesis of Ir-4 .....                                                                                                | 5         |
| S1.2.5 Synthesis of Rh-1.....                                                                                                 | 6         |
| S1.2.6 NMR spectra of Ir and Rh complexes.....                                                                                | 7         |
| <b>S1.3 General catalysis procedure.....</b>                                                                                  | <b>11</b> |
| S1.3.1 General catalysis procedure for the alkylation of ketone with primary alcohols to deliver mono-alkylated ketones ..... | 11        |
| S1.3.2 General catalysis procedure for the alkylation of ketone with primary alcohols to deliver mono-alkylated alcohols..... | 11        |
| <b>S1.4 Attempts at catalysing other HB reactions.....</b>                                                                    | <b>12</b> |
| <b>S1.5 Extended data of optimising the reaction conditions.....</b>                                                          | <b>13</b> |
| <b>S1.6 Kinetic study .....</b>                                                                                               | <b>15</b> |
| S1.6.1 Time course profile of the formation of ketone product 3aa using the catalyst Ir-1 .....                               | 15        |
| S1.6.2 Time course profile of the formation of alcohol product 4aa using the catalyst Rh-2 .....                              | 15        |
| <b>S1.7 Mechanistic investigations.....</b>                                                                                   | <b>16</b> |
| S1.7.1 D <sub>2</sub> O addition experiments .....                                                                            | 16        |
| S1.7.2 Deuterium labelling experiments .....                                                                                  | 17        |
| <b>S1.8 <sup>1</sup>H, <sup>13</sup>C{<sup>1</sup>H} NMR data of catalysis products.....</b>                                  | <b>18</b> |
| S1.8.1 Ketone scope for the alkylated ketones .....                                                                           | 18        |
| S1.8.2 Alcohol scope for the alkylated ketones.....                                                                           | 21        |
| S1.8.3 Scope for the alkylated alcohols .....                                                                                 | 23        |
| <b>S1.9 <sup>1</sup>H, <sup>13</sup>C{<sup>1</sup>H} NMR spectra of catalysis products .....</b>                              | <b>25</b> |
| S1.9.1 Ketone scope for the alkylated ketones .....                                                                           | 25        |
| S1.9.2 Alcohol scope for the alkylated ketones.....                                                                           | 38        |
| S1.9.3 Scope for the alkylated alcohols .....                                                                                 | 50        |
| <b>S1.10 References.....</b>                                                                                                  | <b>55</b> |

## S1.1 General considerations

Unless otherwise specified, all manipulations were performed under inert atmosphere using standard Schlenk techniques or vacuum techniques<sup>1</sup> in a nitrogen or argon-filled Braun glovebox. All reagents were purchased from Aldrich Chemical Company Inc. or Alfa Aesar Inc. and used as received unless otherwise noted.  $\text{RhCl}_3 \cdot x\text{H}_2\text{O}$  and  $\text{IrCl}_3 \cdot x\text{H}_2\text{O}$  were purchased from Precious Metals Online PMO P/L. For all the air-sensitive and moisture-sensitive manipulations and preparations, acetonitrile, dichloromethane, tetrahydrofuran and pentane were dispensed from a LC Technology solvent purification system and stored under nitrogen or argon atmospheres in glass ampoules fitted with Young's Teflon valve. The bulk compressed gases argon (> 99.999%) and carbon monoxide (> 99.5%) were obtained from Air Liquide and used as received. Nitrogen gas for Schlenk line operation comes from in-house liquid nitrogen boil-off.

The Ir and Rh complexes studied in this work were synthesized using literature procedures.<sup>2-4</sup>  $^1\text{H}$  and  $^{13}\text{C}\{^1\text{H}\}$  NMR spectra were recorded on Bruker Jones 400, Ripley 500 and DMX 600 spectrometers operating at 400, 500 and 600 MHz ( $^1\text{H}$ ) respectively and 101, 126 and 150 MHz ( $^{13}\text{C}$ ) respectively.  $^1\text{H}$  and  $^{13}\text{C}\{^1\text{H}\}$  NMR chemical shifts were referenced internally to residual solvent resonances. Unless otherwise stated, spectra were recorded at 298 K and chemical shifts (d), with uncertainties  $\pm 0.01$  Hz for  $^1\text{H}$  and  $\pm 0.05$  Hz for  $^{13}\text{C}$ , are quoted in parts per million, ppm. Multiplicity is abbreviated as: s, Singlet; d, doublet; dd, doublet of doublets; dt, doublet of triplets; t, triplet; q, quartet; dq, doublet of quartets; td, triplet of doublets; m, multiplet; br, broad. Deuterated solvents were purchased from Cambridge Stable Isotopes and used as received. Air sensitive NMR samples were prepared in an inert gas glovebox or by vacuum transfer of deuterated solvents into NMR tubes fitted with a Young's Teflon valve.

## S1.2 Synthesis

### S1.2.1 General synthetic routes of the catalysts

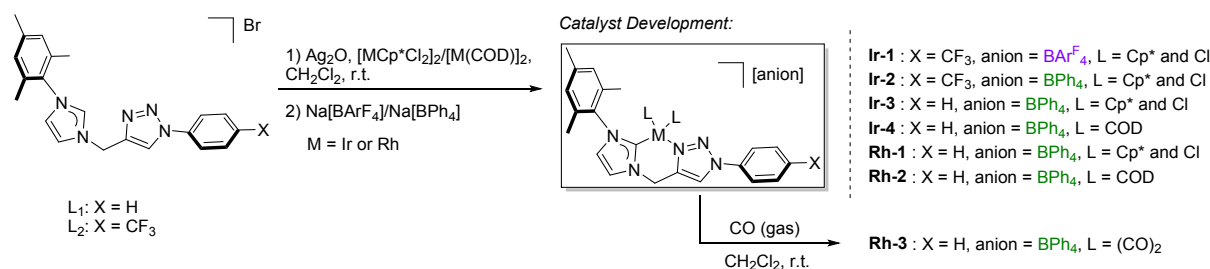

**Scheme S1** Synthetic routes of the metal complexes. COD = 1,5-cyclooctadiene.

Ligand **L**<sub>1</sub> and **L**<sub>2</sub>, complexes **Ir-1**, **Rh-2** and **Rh-3** were reported in literature.<sup>4</sup>

### S1.2.2 Synthesis of **Ir-2**

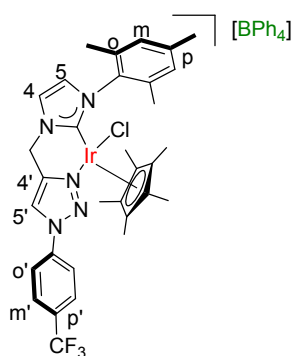

Ligand **L**<sub>2</sub> (111.1 mg, 0.225 mmol) was dissolved in CH<sub>2</sub>Cl<sub>2</sub> (20 mL) followed by adding Ag<sub>2</sub>O (91.4 mg, 0.390 mmol). The reaction mixture was stirred at room temperature overnight. The solid was removed filtering through Celite and washed thoroughly with CH<sub>2</sub>Cl<sub>2</sub>. The solvent was removed under reduced pressure and re-dissolved with CH<sub>2</sub>Cl<sub>2</sub> (20 mL). [IrCp\*Cl<sub>2</sub>]<sub>2</sub> (90.0 mg, 0.187 mmol) was added into the mixture prior to the addition of Na[BPh<sub>4</sub>] (77.0 mg, 0.225 mmol) and the mixture was stirred for 3 hours under N<sub>2</sub>. The solvent was concentrated *in vacuo* to ca. 2 mL and pentane (25 mL) was added. Yellow precipitate forms in solution with vigorous stirring. The solid was dried *in vacuo* to afford the product as a yellow solid. (200.0 mg, 80%). <sup>1</sup>H NMR (400 MHz, Methylene Chloride-*d*<sub>2</sub>) δ 7.81 (d, <sup>3</sup>J<sub>Ho'-Hm'</sub> = 8.5 Hz, 2H, *o'*-CH of Ph), 7.62 (d, <sup>3</sup>J<sub>Ho'-Hm'</sub> = 8.4 Hz, 2H, *m'*-CH of Ph), 7.43 (br s, 8H, *o*-CH of BPh<sub>4</sub>), 6.97 (t, <sup>3</sup>J<sub>H-H</sub> = 7.4 Hz, 8H, *o*-CH of BPh<sub>4</sub> overlapped with Im-H4), 6.94 (s, 1H, *m*-CH of Mes), 6.93 (s, 1H, *m*-CH of Mes), 6.80 – 6.79 (m, 5H, *p*-CH of BPh<sub>4</sub> overlapped with Im-H5), 6.69 (s, 1H, Tz-H5'), 4.55 (d, <sup>2</sup>J<sub>H-H</sub> = 15.9 Hz, 1H, CH<sub>2</sub>), 4.19 (d, <sup>2</sup>J<sub>H-H</sub> = 15.9 Hz, 1H, CH<sub>2</sub>), 2.32 (s, 3H, *p*-CH<sub>3</sub> of Mes), 2.10 (s, 3H, *o*-CH<sub>3</sub> of Mes), 1.96 (s, 3H, *o*-CH<sub>3</sub> of Mes), 1.43 (s, 15H, CH<sub>3</sub> of Cp\*) ppm. <sup>13</sup>C{<sup>1</sup>H} NMR (101 MHz, Methylene Chloride-*d*<sub>2</sub>) δ 164.7 (q, <sup>1</sup>J<sub>B-C</sub> = 49.5 Hz, *ipso*-C<sub>q</sub> of BPh<sub>4</sub>), 152.9 (Im-C2), 141.8 (Tz-C4'), 140.5 (*p*-CCH<sub>3</sub> of Mes), 139.4 (*o*-CCH<sub>3</sub> of Mes), 138.8 (*ipso*-C<sub>q</sub> of ArCF<sub>3</sub>), 136.7 (br s, *o*-CH of BPh<sub>4</sub>), 135.8 (*ipso*-C<sub>q</sub> of Mes), 135.2 (*o*-CCH<sub>3</sub> of Mes), 132.7 (q, <sup>2</sup>J<sub>C-F</sub> = 33.3 Hz, *p'*-CCF<sub>3</sub> of ArCF<sub>3</sub>), 130.1 (*m*-CH of Mes), 128.8 (*m*-CH of Mes), 128.1 (q, <sup>3</sup>J<sub>C-F</sub> = 3.44 Hz, *m'*-CH of ArCF<sub>3</sub>), 126.8, (br s, *m*-CH of

BPh<sub>4</sub>), 126.2 (Im-C5), 124.3 (q, <sup>1</sup>J<sub>C-F</sub> = 272.0 Hz, ArCF<sub>3</sub>), 124.0 (Im-C4), 123.0 (*p*-CH of BPh<sub>4</sub>), 122.5 (Tz-C5'), 121.9 (*o*'-CH of ArCF<sub>3</sub>), 92.3 (C<sub>q</sub> of Cp\*), 45.6 (CH<sub>2</sub>), 21.6 (*p*-CH<sub>3</sub> of Mes), 20.5 (*o*-CH<sub>3</sub> of Mes), 19.8 (*o*-CH<sub>3</sub> of Mes), 10.0 (CH<sub>3</sub> of Cp\*) ppm. HRMS (ESI<sup>+</sup>, MeOH) calculated for [C<sub>32</sub>H<sub>35</sub>ClF<sub>3</sub>IrN<sub>5</sub>]<sup>+</sup> = [M-BPh<sub>4</sub>]<sup>+</sup> = 774.2162; found [C<sub>32</sub>H<sub>35</sub>ClF<sub>3</sub>IrN<sub>5</sub>]<sup>+</sup> = [M-BPh<sub>4</sub>]<sup>+</sup> = 774.2150. Elemental analysis calculated for C<sub>56</sub>H<sub>56</sub>BClF<sub>3</sub>IrN<sub>5</sub>: C, 61.51; H, 5.07; N, 6.40%; found C, 61.30; H, 5.62; N, 5.22% (deviations likely due to moisture).

### S1.2.3 Synthesis of Ir-3

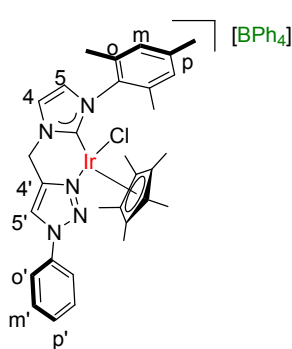

Ligand **L**<sub>1</sub> (126.9 mg, 0.300 mmol) was dissolved in CH<sub>2</sub>Cl<sub>2</sub> (20 mL) followed by adding Ag<sub>2</sub>O (121.3 mg, 0.523 mmol). The reaction mixture was stirred at room temperature overnight. The solid was removed filtering through Celite and washed thoroughly with CH<sub>2</sub>Cl<sub>2</sub>. The solvent was removed under reduced pressure and re-dissolved with CH<sub>2</sub>Cl<sub>2</sub> (20 mL). [IrCp\*Cl<sub>2</sub>]<sub>2</sub> (118.6 mg, 0.149 mmol) was added into the mixture prior to the addition of Na[BPh<sub>4</sub>] (102.6 mg, 0.300 mmol) and the mixture was stirred for 3 hours under N<sub>2</sub>. The solvent was concentrated *in vacuo* to ca. 2 mL and pentane (25 mL) was added. Yellow precipitate forms in solution with vigorous stirring. The solid was dried *in vacuo* to afford the product as a yellow solid. (230.8 mg, 75%). <sup>1</sup>H NMR (500 MHz, Methylene Chloride-*d*<sub>2</sub>) δ 7.58 – 7.53 (m, 5H, *o*'-, *m*'- and *p*'-CH of Ph), 7.43 – 7.37 (br s, 8H, *o*-CH of BPh<sub>4</sub>), 6.99 (t, <sup>3</sup>J<sub>H-H</sub> = 7.4 Hz, 9H, *m*-CH of BPh<sub>4</sub> overlapped with Tz-H5), 6.93 – 6.94 (m, 3H, Im-H5 overlapped with *m*-CH of Mes), 6.92 (d, <sup>3</sup>J<sub>H4-H5</sub> = 2.0 Hz, 1H, Im-H5), 6.85 – 6.82 (t, 4H, <sup>3</sup>J<sub>H-H</sub> = 7.3 Hz, 4H, *p*-CH of BPh<sub>4</sub>), 6.79 (d, <sup>3</sup>J<sub>H4-H5</sub> = 2.0, 1H, Im-H4), 4.55 (d, <sup>2</sup>J<sub>H-H</sub> = 15.9 Hz, 1H, CH<sub>2</sub>), 4.20 (d, <sup>2</sup>J<sub>H-H</sub> = 15.8 Hz, 1H, CH<sub>2</sub>), 2.32 (s, 3H, *p*-CH<sub>3</sub> of Mes), 2.10 (s, 3H, *o*-CH<sub>3</sub> of Mes), 1.96 (s, 3H, *o*-CH<sub>3</sub> of Mes), 1.43 (s, 15H, CH<sub>3</sub> of Cp\*) ppm. <sup>13</sup>C{<sup>1</sup>H} NMR (126 MHz, Methylene Chloride-*d*<sub>2</sub>) δ 164.8 (q, <sup>1</sup>J<sub>B-C</sub> = 49.5 Hz, *ipso*-C<sub>q</sub> of BPh<sub>4</sub>), 152.9 (Im-C2), 141.4 (Tz-C4'), 140.5 (*p*-CCH<sub>3</sub> of Mes), 139.4 (*o*-CCH<sub>3</sub> of Mes), 136.8 (br s, *o*-CH of BPh<sub>4</sub>), 136.6 (*ipso*-C<sub>q</sub> of Ph), 135.8 (*ipso*-C<sub>q</sub> of Mes), 135.3 (*o*-CCH<sub>3</sub> of Mes), 131.2 (*p*'-CH of Ph), 130.8 (*o*'-CH of Ph), 130.1 (*m*-CH of Mes), 128.8 (*m*-CH of Mes), 126.7 (br s, *m*-CH of BPh<sub>4</sub>), 126.1 (Im-C4), 124.0 (Im-C5), 122.9 (*p*-CH of BPh<sub>4</sub>), 122.4 (Tz-C5'), 121.6 (*m*'-CH of Ph), 92.2 (C<sub>q</sub> of Cp\*), 45.6 (CH<sub>2</sub>), 21.6 (*p*-CH<sub>3</sub> of Mes), 20.5 (*o*-CH<sub>3</sub> of Mes), 19.8 (*o*-CH<sub>3</sub> of Mes), 10.0 (CH<sub>3</sub> of Cp\*) ppm. HRMS (ESI<sup>+</sup>, MeOH) calculated for [C<sub>31</sub>H<sub>36</sub>ClIrN<sub>5</sub>]<sup>+</sup> = [M-BPh<sub>4</sub>]<sup>+</sup> = 706.2888;

found  $[C_{31}H_{36}ClIrN_5]^+ = [M-BPh_4]^+ = 706.2876$ . Elemental analysis calculated for  $C_{53}H_{54}BIrN_5$ : C, 64.41; H, 5.50; N, 6.83%; found C, 64.39; H, 5.62; N, 6.99%.

### S1.2.4 Synthesis of Ir-4

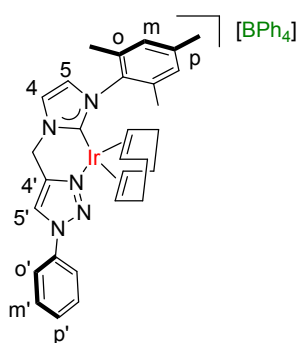

Ligand **L**<sub>1</sub> (159.2 mg, 0.374 mmol) was dissolved in CH<sub>2</sub>Cl<sub>2</sub> (20 mL) followed by adding Ag<sub>2</sub>O (72.4 mg, 0.312 mmol). The reaction mixture was stirred at room temperature overnight. The solid was removed filtering through Celite and washed thoroughly with CH<sub>2</sub>Cl<sub>2</sub>. The solvent was removed under reduced pressure and re-dissolved with CH<sub>2</sub>Cl<sub>2</sub> (20 mL). [Ir(COD)Cl]<sub>2</sub> (125.1 mg, 0.187 mmol) was added into the mixture prior to the addition of Na[BPh<sub>4</sub>] (127.6 mg, 0.373 mmol) and the mixture was stirred for 3 hours under N<sub>2</sub>. The solvent was concentrated *in vacuo* to ca. 2 mL and pentane (25 mL) was added. Yellow precipitate forms in solution with vigorous stirring. The solid was dried *in vacuo* to afford the product as a red-pink solid. (230.1 mg, 64%) <sup>1</sup>H NMR (600 MHz, Methylene Chloride-*d*<sub>2</sub>): δ 7.55 (m, 3H, *o*'- and *p*'-CH of Ph), 7.50 (m, 2H, *m*'-CH of Ph), 7.42 (m, 8H, *o*-CH of BPh<sub>4</sub>), 7.02 (s, 2H, *m*-CH of Mes), 6.99 (t, <sup>3</sup>J<sub>H-H</sub> = 7.5 Hz, 8H, *m*-CH of BPh<sub>4</sub>), 6.93 (d, <sup>3</sup>J<sub>H4-H5</sub> = 2.0 Hz, 1H, Im-H5), 6.90 (s, 1H, Tz-H5'), 6.83 (d, <sup>3</sup>J<sub>H4-H5</sub> = 2.0 Hz, 1H, Im-H4), 6.82 (t, <sup>3</sup>J<sub>H-H</sub> = 7.3 Hz, 4H, *p*-CH of BPh<sub>4</sub>), 4.65 (m, 2H, =CH of COD), 4.59 (s, 2H, CH<sub>2</sub>), 3.45 (m, 2H, =CH of COD), 2.36 (s, 3H, *p*-CH<sub>3</sub> of Mes), 2.10 (m, 2H, CH<sub>2</sub> of COD), 2.07 (s, 6H, *o*-CH<sub>3</sub> of Mes), 1.83 (m, 6H, CH<sub>2</sub> of COD) ppm. <sup>13</sup>C NMR (150 MHz, Methylene Chloride-*d*<sub>2</sub>): δ 172.5 (Im-C2), 164.5 (q, <sup>1</sup>J<sub>B-C</sub> = 49.5 Hz, ipso-Cq of BPh<sub>4</sub>), 140.3 (*p*-CCH<sub>3</sub> of Mes), 139.1 (Cq, Tz-C4'), 136.3 (br s, *o*-CH of BPh<sub>4</sub>), 136.1 (ipso-Cq of Ph), 135.7 (*o*-CCH<sub>3</sub> of Mes), 135.6 (ipso-Cq of Mes), 130.7 (*p*'-CH of Ph), 130.4 (*o*'-CH of Ph), 129.5 (*m*-CH of Mes), 126.3 (br s, *m*-CH of BPh<sub>4</sub>), 123.5 (Im-C4), 122.4 (Tz-C5'), 122.4 (*p*-CH of BPh<sub>4</sub>), 121.9 (Im-C5), 121.1 (*m*'-CH of Ph), 84.0 (2C, =CH of COD), 66.2 (2C, =CH of COD), 44.9 (CH<sub>2</sub>), 33.5 (2C, -CH<sub>2</sub> of COD), 29.8 (2C, -CH<sub>2</sub> of COD), 21.2 (*p*-CH<sub>3</sub> of Mes), 18.7 (*o*-CH<sub>3</sub> of Mes) ppm. HRMS (ESI<sup>+</sup>, MeOH) calculated for [C<sub>29</sub>H<sub>33</sub>IrN<sub>5</sub>]<sup>+</sup> = [M-BPh<sub>4</sub>]<sup>+</sup> = 644.2360, found [C<sub>29</sub>H<sub>33</sub>IrN<sub>5</sub>]<sup>+</sup> = [M-BPh<sub>4</sub>]<sup>+</sup> = 644.2371). Elemental analysis calculated for C<sub>53</sub>H<sub>54</sub>BIrN<sub>5</sub>: C, 66.10; H, 5.55; N, 7.27%; found C, 66.36; H, 5.35; N, 7.03%.

### S1.2.5 Synthesis of Rh-1

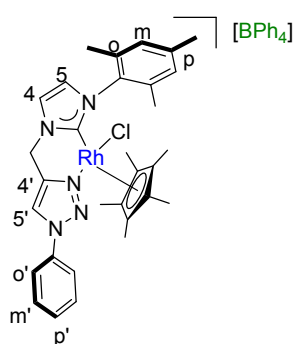

Ligand **L**<sub>1</sub> (126.9 mg, 0.300 mmol) was dissolved in CH<sub>2</sub>Cl<sub>2</sub> (20 mL) followed by adding Ag<sub>2</sub>O (121.3 mg, 0.523 mmol). The reaction mixture was stirred at room temperature overnight. The solid was removed filtering through Celite and washed thoroughly with CH<sub>2</sub>Cl<sub>2</sub>. The solvent was removed under reduced pressure and re-dissolved with CH<sub>2</sub>Cl<sub>2</sub> (20 mL). [RhCp\*Cl<sub>2</sub>]<sub>2</sub> (86.7 mg, 0.149 mmol) was added into the mixture prior to the addition of Na[BPh<sub>4</sub>] (102.6 mg, 0.300 mmol) and the mixture was stirred for 3 hours under N<sub>2</sub>. The solvent was concentrated *in vacuo* to *ca.* 2 mL and pentane (25 mL) was added. Yellow precipitate forms in solution with vigorous stirring. The solid was dried *in vacuo* to afford the product as a yellow solid. (232.9 mg, 83%). <sup>1</sup>H NMR (400 MHz, Methylene Chloride-*d*<sub>2</sub>) δ 7.63 – 7.52 (m, 5H, *o*'-, *m*'- and *p*'-CH of Ph), 7.39 (br s, 8H, *o*-CH of BPh<sub>4</sub>), 7.26 (s, 1H, Tz-H5), 7.04 (d, <sup>3</sup>J<sub>H4-H5</sub> = 1.9 Hz, 1H, Im-H5), 6.99 (t, <sup>3</sup>J<sub>H-H</sub> = 7.3 Hz, 8H, *m*-CH of BPh<sub>4</sub>), 6.95 (s, 2H, *m*-CH of Mes), 6.88 – 6.80 (m, 5H, *p*-CH of BPh<sub>4</sub> overlapped with Im-H4), 4.86 (d, <sup>2</sup>J<sub>H-H</sub> = 15.8 Hz, 1H, CH<sub>2</sub>), 4.40 (d, <sup>2</sup>J<sub>H-H</sub> = 15.7 Hz, 1H, CH<sub>2</sub>), 2.33 (s, 3H, *p*-CH<sub>3</sub> of Mes), 2.13 (s, 3H, *o*-CH<sub>3</sub> of Mes), 1.94 (s, 3H, *o*-CH<sub>3</sub> of Mes), 1.41 (s, 15H, CH<sub>3</sub> of Cp\*).ppm. <sup>13</sup>C{<sup>1</sup>H} NMR (126 MHz, Methylene Chloride-*d*<sub>2</sub>) δ 169.2 (d, <sup>1</sup>J<sub>Rh-C</sub> = 54.1 Hz, Im-C2) 164.7 (q, <sup>1</sup>J<sub>B-C</sub> = 49.5 Hz, *ipso*-C<sub>q</sub> of BPh<sub>4</sub>), 142.2 (C<sub>q</sub>, Tz-C4'), 140.5 (*p*-CCH<sub>3</sub> of Mes), 139.3 (*o*-CCH<sub>3</sub> of Mes), 136.8 (s, *o*-CH of BPh<sub>4</sub> overlapped with *ipso*-C<sub>q</sub> of Ph), 136.0 (*ipso*-C<sub>q</sub> of Mes), 135.3 (*o*-CCH<sub>3</sub> of Mes), 131.1 (*p*'-CH of Ph), 130.8 (*o*'-CH of ph), 130.2 (*m*-CCH<sub>3</sub> of Mes), 128.9 (*m*-CCH<sub>3</sub> of Mes), 126.7 (br s, *m*-CH of BPh<sub>4</sub>), 126.4 (Im-C4), 125.0 (Im-C5), 122.9 (*p*-CH of BPh<sub>4</sub>), 122.8 (Tz-C5'), 121.6 (*o*'-CH of Ph), 99.3 (d, <sup>2</sup>J<sub>Rh-C</sub> = 6.9 Hz, C<sub>q</sub> of Cp\*), 45.4 (CH<sub>2</sub>), 21.6 (*p*-CH<sub>3</sub> of Mes), 20.4 (*o*-CH<sub>3</sub> of Mes), 19.6 (*o*-CH<sub>3</sub> of Mes), 10.2 (CH<sub>3</sub> of Cp\*) ppm. HRMS (ESI<sup>+</sup>, MeOH) calculated for [C<sub>31</sub>H<sub>36</sub>N<sub>5</sub>Rh]<sup>+</sup> = [M-BPh<sub>4</sub>]<sup>+</sup> = 616.1714; found [C<sub>31</sub>H<sub>36</sub>N<sub>5</sub>Rh]<sup>+</sup> = [M-BPh<sub>4</sub>]<sup>+</sup> = 616.1735. Elemental analysis calculated for C<sub>53</sub>H<sub>54</sub>BIrN<sub>5</sub>: C, 70.56; H, 6.03; N, 7.48%; found C, 69.20; H, 6.24; N, 7.85%. (deviations likely due to moisture).





**Ir-3**  $^1\text{H}$  NMR (500 MHz, Methylene Chloride- $d_2$ )

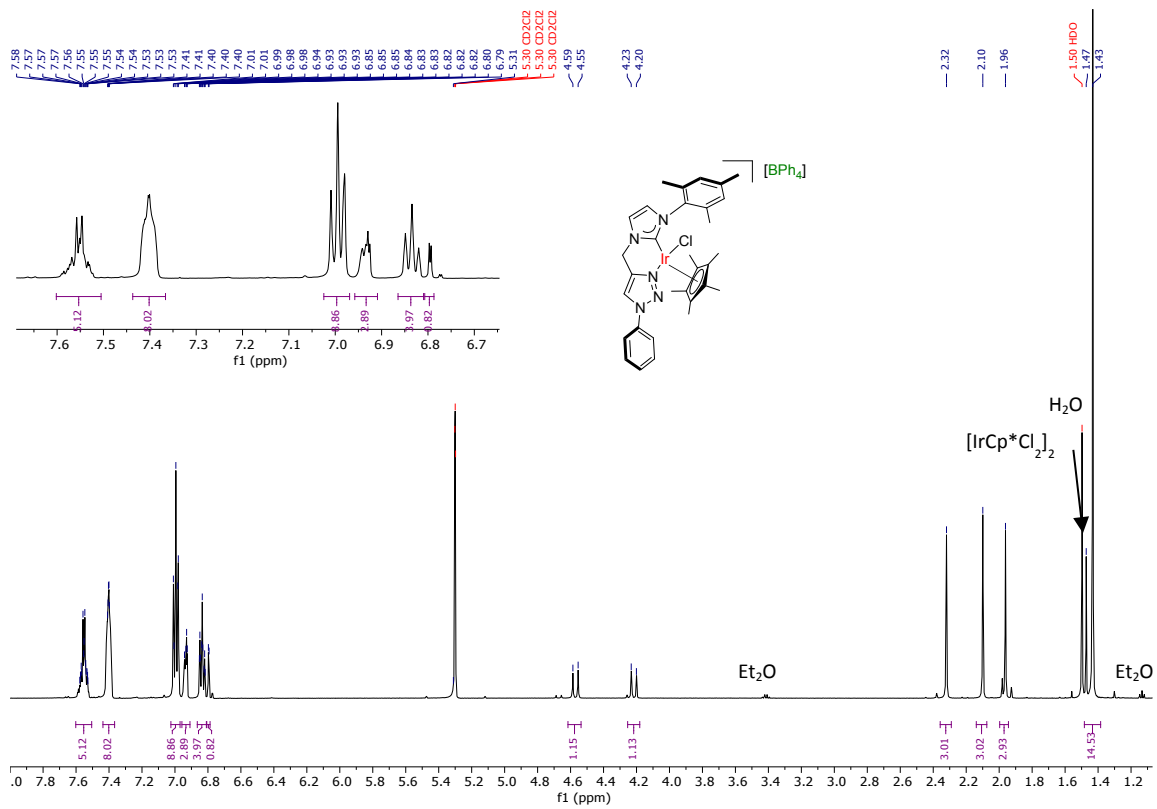

**Ir-3**  $^{13}\text{C}\{^1\text{H}\}$  NMR (126 MHz, Methylene Chloride- $d_2$ )

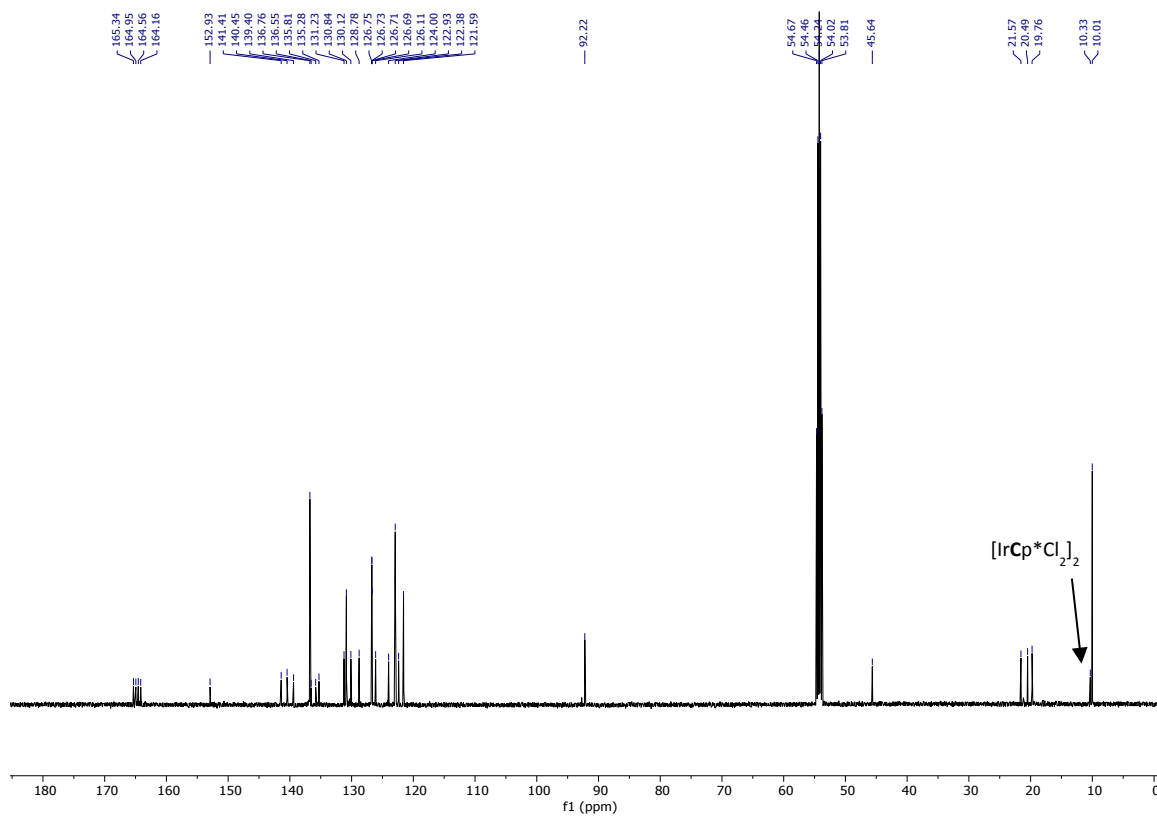

### Ir-4 $^1\text{H}$ NMR (600 MHz, Methylene Chloride- $d_2$ )

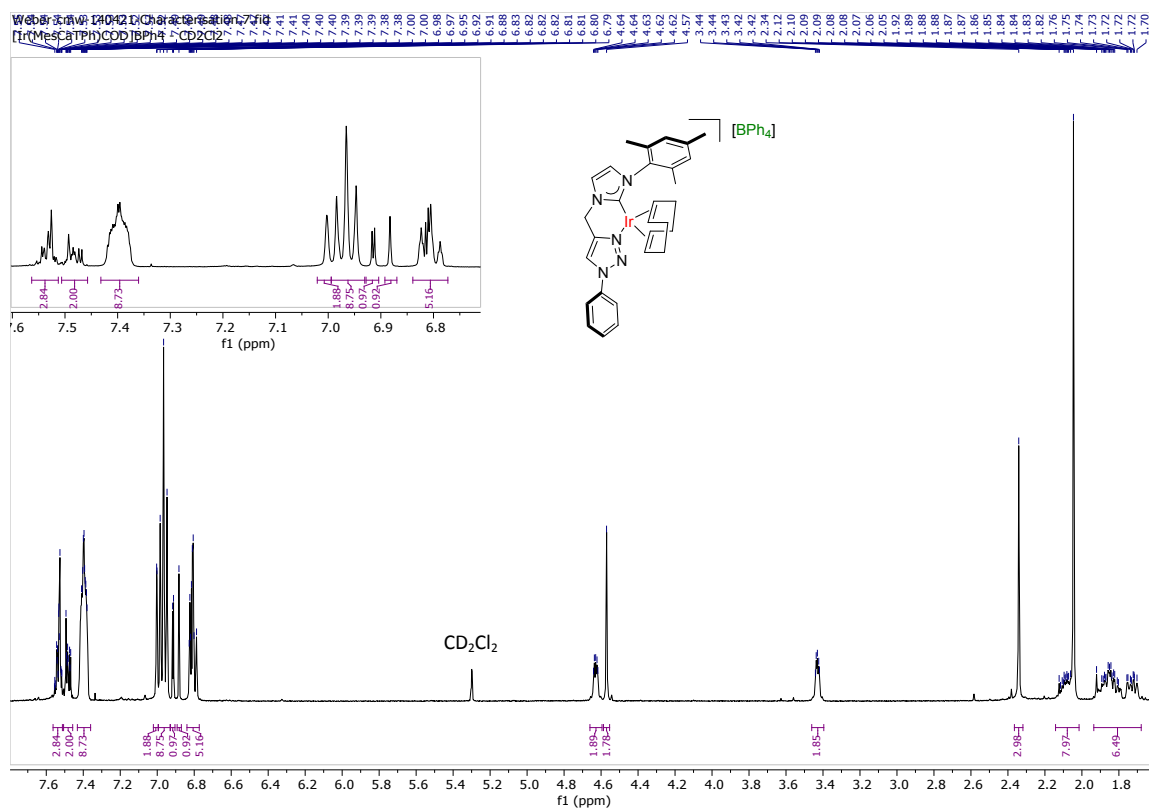

### Ir-4 $^{13}\text{C}\{^1\text{H}\}$ NMR (150 MHz, Methylene Chloride- $d_2$ )

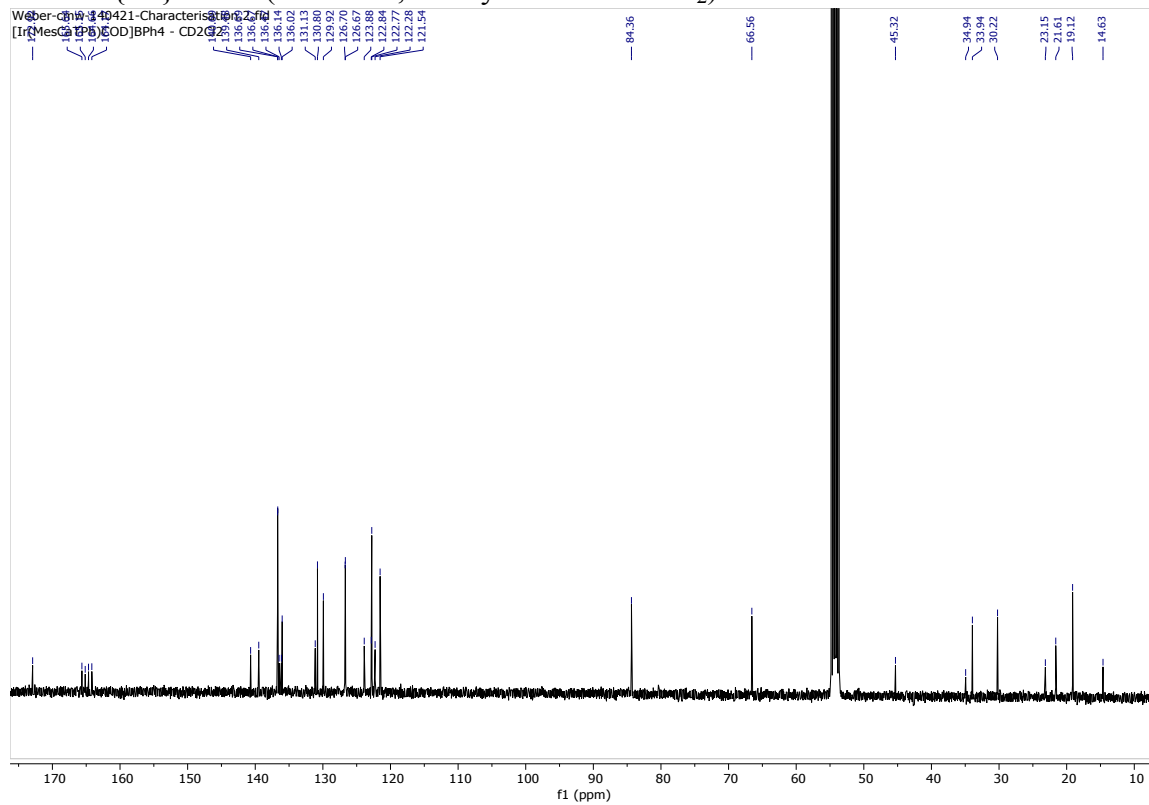



### S1.2.1 Synthesis of the deuterated substrates

The two deuterated versions of the alcohol substrates **2a**: C<sub>6</sub>H<sub>5</sub>CH<sub>2</sub>OD (**2a-*O*d<sub>1</sub>**)<sup>5</sup> and C<sub>6</sub>H<sub>5</sub>CD<sub>2</sub>OH (**2a-*C*d<sub>2</sub>**)<sup>6</sup> were synthesised according to the literature.

### S1.3 General catalysis procedure

#### S1.3.1 General catalysis procedure for the alkylation of ketone with primary alcohols to deliver mono-alkylated ketones

All the reactions were operated in air. The methyl ketone (**1a – 1q**) (0.5 mmol), primary alcohol (**2a – 2o**) (0.5 mmol), **Ir-3** (0.005 mmol, 1.0 mol%), KO<sup>t</sup>Bu (0.1 mmol, 0.25 mmol or 0.40 mmol, 0.2 equiv., 0.5 equiv. or 0.8 equiv.) were weighed into a 4 mL glass vial fitted with a close-top melamine cap with PTFE liner and a stirrer bar. Toluene (1.0 mL) was then added to the mixture. The reaction mixture was stirred at room temperature for five minutes until a homogeneous mixture is observed before placing in an oil bath at 100 °C. After 6 hours, the reaction mixture was taken out of the oil bath and immediately cooled in the fridge before the work-up. The insoluble particles (mainly base) were filtered through 3 pipettes blocked with a cotton roll and were washed thoroughly with Et<sub>2</sub>O. The crude products were combined and isolated by column chromatography using ethyl acetate/n-hexane (10:1, v/v) as eluent to afford the corresponding desired products.

#### S1.3.2 General catalysis procedure for the alkylation of ketone with primary alcohols to deliver mono-alkylated alcohols

All the reactions were operated in air. The methyl ketones (0.5 mmol), primary alcohols (1.0 mmol), **Rh-2** complex (0.005 mmol, 1 mol%), KOH (1.0 mmol, 2.0 equiv. in respect of ketone) were weighed into a 4 mL glass vial fitted with a close-top melamine cap with PTFE liner and a stirrer bar. Toluene (1.0 mL) was then added to the mixture. The reaction mixture was stirred at room temperature for five minutes until a homogeneous mixture is observed before placing in an oil bath at 120 °C. After 6 hours, the reaction mixture was taken out of the oil bath and immediately cooled in the fridge before the work-up. The insoluble particles (mainly base) was filtered through 3 pipettes blocked with a cotton roll and was washed thoroughly with Et<sub>2</sub>O. The crude products were combined and isolated by column chromatography using ethyl acetate/n-hexane (3:1, v/v) as eluent to afford the corresponding desired products.

### S1.4 Attempts at catalysing other HB reactions

The following benchmark reactions were conducted under our catalytic conditions in order to test the applicability in other types of HB reactions. However, we only found the reactions between acetophenone and benzylalcohol (eq. 1), benzylalcohol and 1-phenylethanol (eq. 5) were successful.

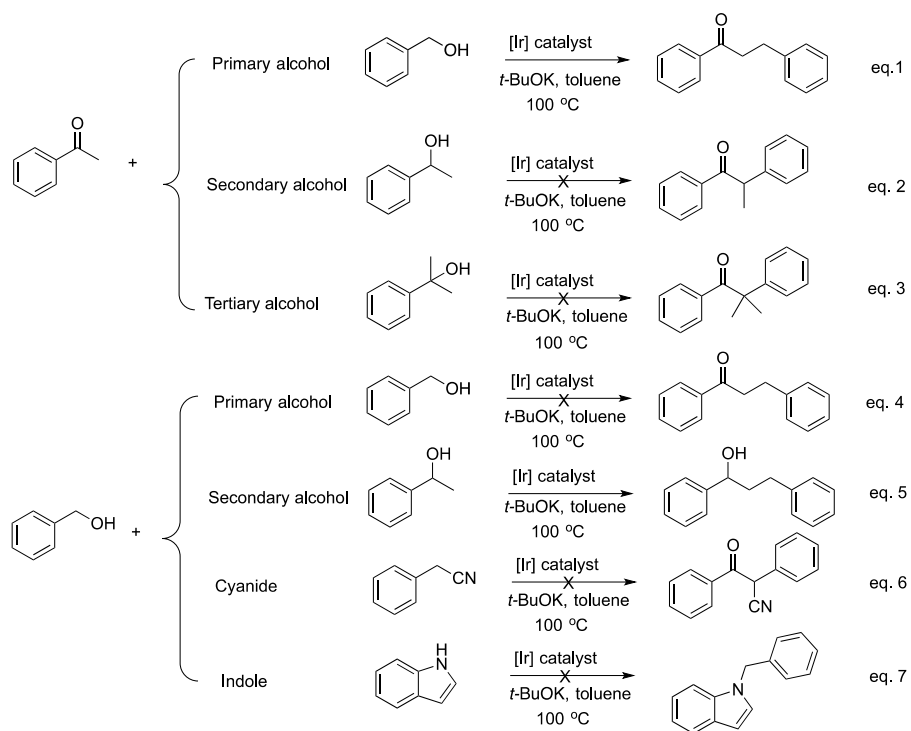

**Scheme S2.** Attempts at catalysing other HB reactions.

## S1.5 Extended data of optimising the reaction conditions

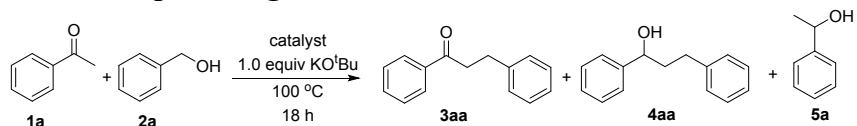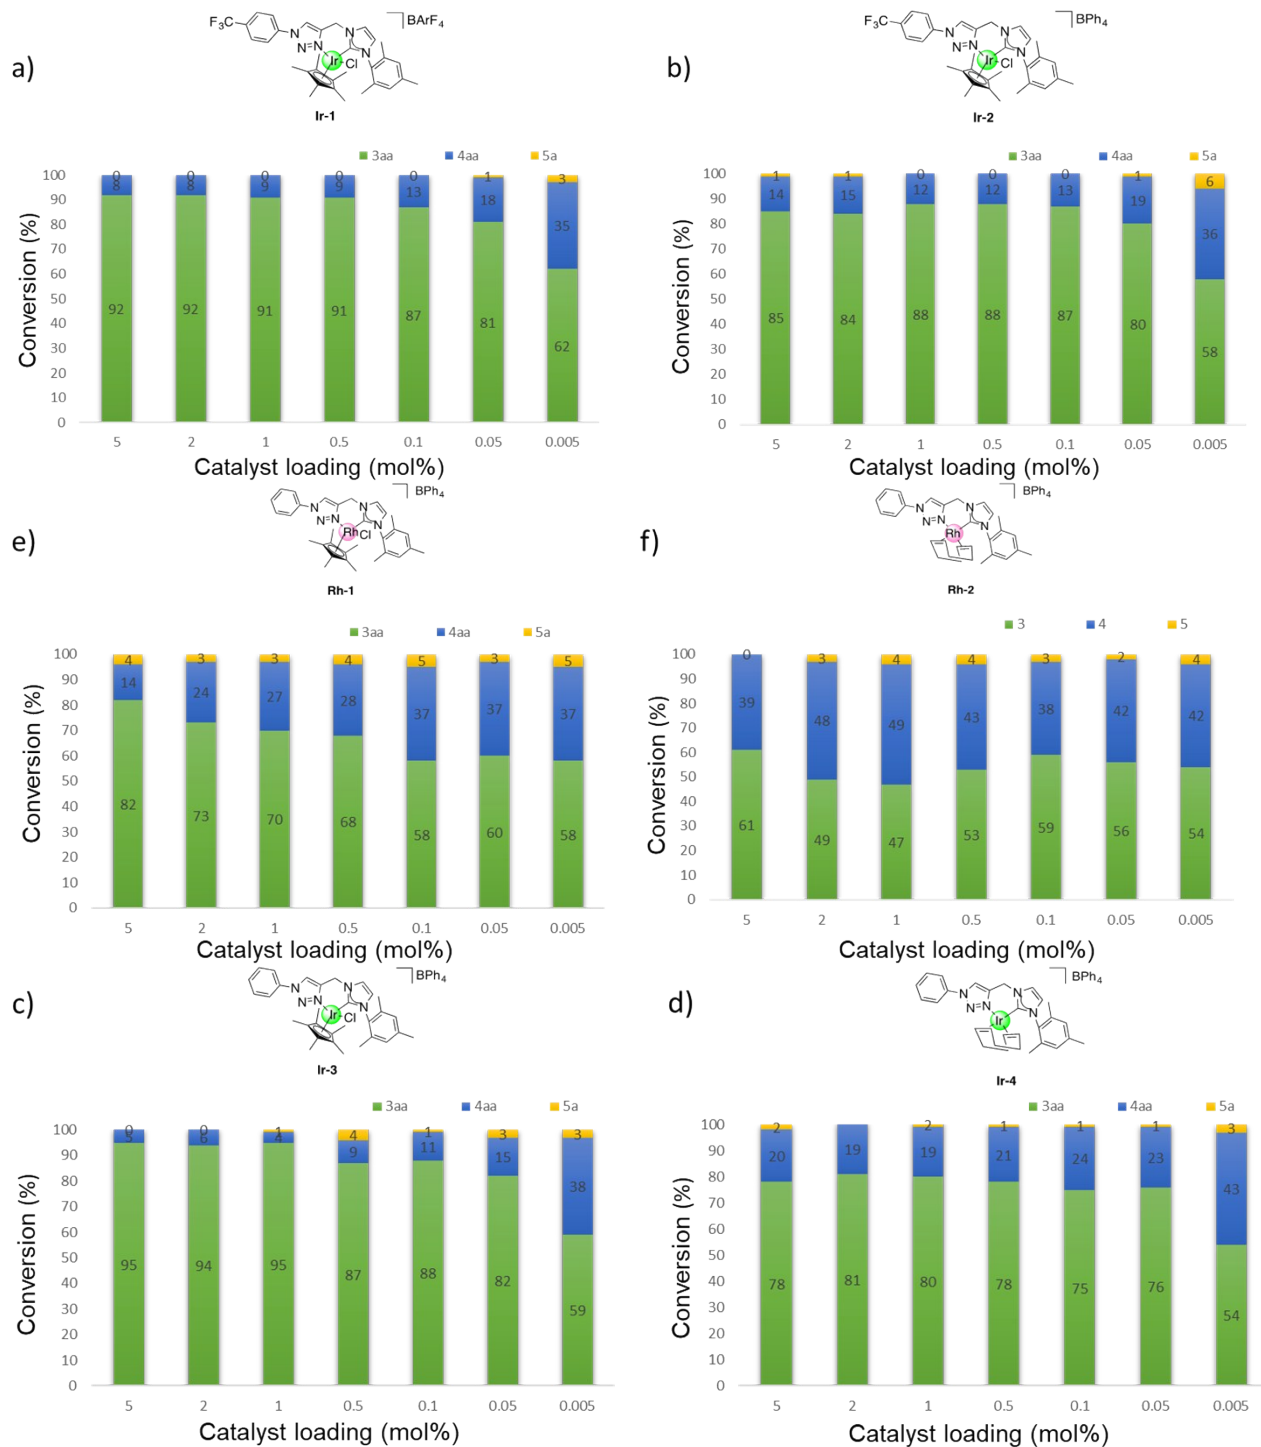

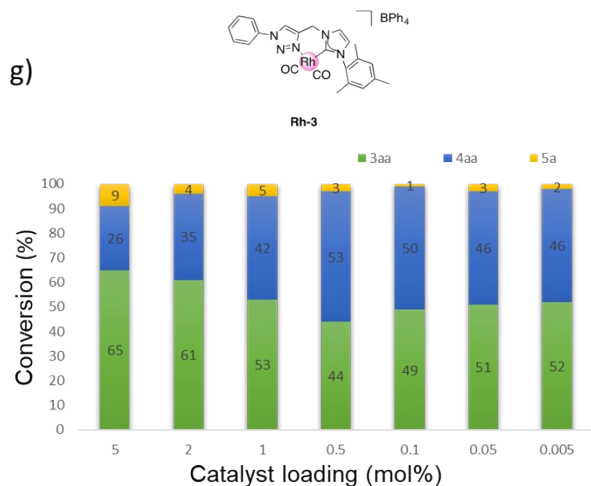

**Figure S1.** Catalyst (**Ir-1** – **Ir-4**; **Rh-1** – **Rh-3**, a – g) screening from the loading of 5 mol% to 0.005 mol% in the presence of 1.0 equiv. of KO<sup>t</sup>Bu reacted in toluene-*d*<sub>8</sub> at 100 °C for 18 h. Conversions were measured by <sup>1</sup>H NMR spectral analysis.

| entry | catalyst    |                   |                 |              |      | base (equiv)                          | temp (°C) | conversion (%) <sup>a</sup> |           |          |    |
|-------|-------------|-------------------|-----------------|--------------|------|---------------------------------------|-----------|-----------------------------|-----------|----------|----|
|       | name        | anion             | X group         | co-ligand(s) | mol% |                                       |           | 2a                          | 3aa       | 4aa      | 5a |
| 1     | <b>Ir-1</b> | BArF <sub>4</sub> | CF <sub>3</sub> | Cp*Cl        | 0.5  | KO <sup>t</sup> Bu (1.0)              | 60        | 48                          | 22        | 30       | -  |
| 2     |             | BArF <sub>4</sub> | CF <sub>3</sub> | Cp*Cl        | 1    | KO <sup>t</sup> Bu (1.0)              | 60        | 33                          | 30        | 37       | -  |
| 3     |             | BArF <sub>4</sub> | CF <sub>3</sub> | Cp*Cl        | 0.5  | KO <sup>t</sup> Bu (1.0)              | 100       | 0                           | 91        | 9        | -  |
| 4     |             | BArF <sub>4</sub> | CF <sub>3</sub> | Cp*Cl        | 1    | KO <sup>t</sup> Bu (1.0)              | 100       | 0                           | 91        | 9        | -  |
| 5     | <b>Ir-2</b> | BPh <sub>4</sub>  | CF <sub>3</sub> | Cp*Cl        | 0.5  | KO <sup>t</sup> Bu (1.0)              | 100       | 0                           | 85        | 14       | 1  |
| 6     |             | BPh <sub>4</sub>  | CF <sub>3</sub> | Cp*Cl        | 1    | KO <sup>t</sup> Bu (1.0)              | 100       | 0                           | 85        | 13       | 2  |
| 7     | <b>Ir-3</b> | BPh <sub>4</sub>  | H               | Cp*Cl        | 0.5  | KO <sup>t</sup> Bu (1.0)              | 100       | 0                           | 87        | 9        | 4  |
| 8     |             | BPh <sub>4</sub>  | H               | Cp*Cl        | 1    | KO <sup>t</sup> Bu (1.0)              | 100       | 0                           | 95        | 4        | 1  |
| 9     |             | BPh <sub>4</sub>  | H               | Cp*Cl        | 1    | KO <sup>t</sup> Bu (0.8)              | 100       | 0                           | <b>99</b> | <b>1</b> | -  |
| 10    |             | BPh <sub>4</sub>  | H               | Cp*Cl        | 1    | KO <sup>t</sup> Bu (0.5)              | 100       | 0                           | 94        | 4        | 2  |
| 11    |             | BPh <sub>4</sub>  | H               | Cp*Cl        | 1    | KOH (1.0)                             | 100       | 0                           | 94        | 3        | 3  |
| 12    |             | BPh <sub>4</sub>  | H               | Cp*Cl        | 1    | Cs <sub>2</sub> CO <sub>3</sub> (1.0) | 100       | 49                          | 33        | 6        | 2  |
| 13    |             | BPh <sub>4</sub>  | H               | Cp*Cl        | 1    | K <sub>2</sub> CO <sub>3</sub> (1.0)  | 100       | 100                         | -         | -        | -  |
| 14    |             | BPh <sub>4</sub>  | H               | Cp*Cl        | 1    | Na <sub>2</sub> CO <sub>3</sub> (1.0) | 100       | 100                         | -         | -        | -  |
| 15    |             | BPh <sub>4</sub>  | H               | Cp*Cl        | 1    | NaOH (1.0)                            | 100       | 5                           | 80        | 12       | 3  |
| 16    |             | BPh <sub>4</sub>  | H               | Cp*Cl        | 1    | NaOEt (1.0)                           | 100       | 0                           | 79        | 21       | -  |
| 17    | <b>Ir-4</b> | BPh <sub>4</sub>  | H               | COD          | 1    | KO <sup>t</sup> Bu (1.0)              | 100       | 0                           | 80        | 19       | 1  |

**Table S1.** <sup>a</sup> Reaction conditions: **1a** (0.2 mmol, 1.0 equiv) and **2a** (0.2 mmol, 1.0 equiv) in 0.5 mL toluene-*d*<sub>8</sub> reacted for 18 hours. Conversions were measured by <sup>1</sup>H NMR spectral analysis.

| entry | catalyst    | temp. (°C) | base (equiv)             | 2a (equiv) | conversion (%) <sup>a</sup> |           |       |
|-------|-------------|------------|--------------------------|------------|-----------------------------|-----------|-------|
|       |             |            |                          |            | 3aa                         | 4aa       | 5aa   |
| 1     |             |            | KOH (1.0)                | 2.0        | 9                           | 85        | 6     |
| 2     |             |            | KOH (2.0)                | 2.0        | 6                           | 89        | 5     |
| 3     |             | 100        | KOH (3.0)                | 2.0        | 6                           | 90        | 4     |
| 4     |             |            | KOH (4.0)                | 2.0        | 7                           | 91        | 2     |
| 5     |             |            | KOH (5.0)                | 2.0        | 4                           | 93        | 2     |
| 6     |             | 60         |                          | 2.0        | trace                       | trace     | trace |
| 7     | <b>Rh-2</b> | 80         |                          | 2.0        | 7                           | 78        | 15    |
| 8     |             | 100        | KOH (2.0)                | 2.0        | 6                           | 89        | 5     |
| 9     |             | 120        |                          | 2.0        | <b>8</b>                    | <b>92</b> | -     |
| 10    |             | 100        | KO <sup>t</sup> Bu (2.0) | 2.0        | 8                           | 78        | -     |
| 11    |             | 120        | KOH (2.0)                | 1.2        | 36                          | 60        | 4     |
| 12    |             | 120        | KOH (2.0)                | 1.5        | 18                          | 80        | 2     |
| 13    |             | 120        | KOH (2.0)                | 1.8        | 12                          | 88        | -     |

**Table S2.** <sup>a</sup>Reaction conditions: **1a** (0.2 mmol, 1.0 equiv) and **2a** (0.24 – 0.40 mmol, from 1.2 – 2.0 equiv.) in 0.5 mL toluene-*d*<sub>8</sub> reacted for 18 hours. Conversions were measured by <sup>1</sup>H NMR spectral analysis.

## S1.6 Kinetic study

### S1.6.1 Time course profile of the formation of ketone product **3aa** using the catalyst **Ir-1**

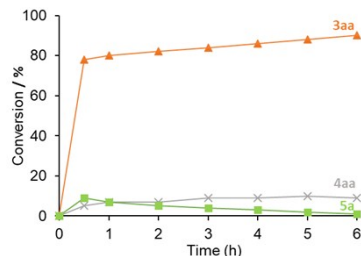

**Figure S3.** Time course profile of coupling benzylalcohol and acetophenone. Conditions: acetophenone **1a** (0.2 mmol), benzylalcohol **2a** (0.2 mmol), **Ir-1** (1.0 mol %), KO<sup>t</sup>Bu (0.8 equiv), toluene-*d*<sub>8</sub> (0.5 mL), 100 °C, under air. Conversions were measured by <sup>1</sup>H NMR spectral analysis.

### S1.6.2 Time course profile of the formation of alcohol product **4aa** using the catalyst **Rh-2**

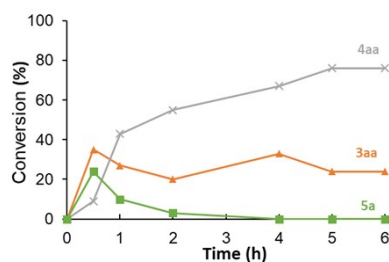

**Figure S4.** Time course profile of coupling benzylalcohol and acetophenone. Conditions: acetophenone **1a** (0.2 mmol), benzylalcohol **2a** (0.4 mmol), **Rh-2** (1.0 mol %), KOH (2.0 equiv.), toluene-*d*<sub>8</sub> (0.5 mL), 120 °C, under air. Conversions were measured by <sup>1</sup>H NMR spectral analysis.



## S1.7 Mechanistic investigations

### S1.7.1 D<sub>2</sub>O addition experiments

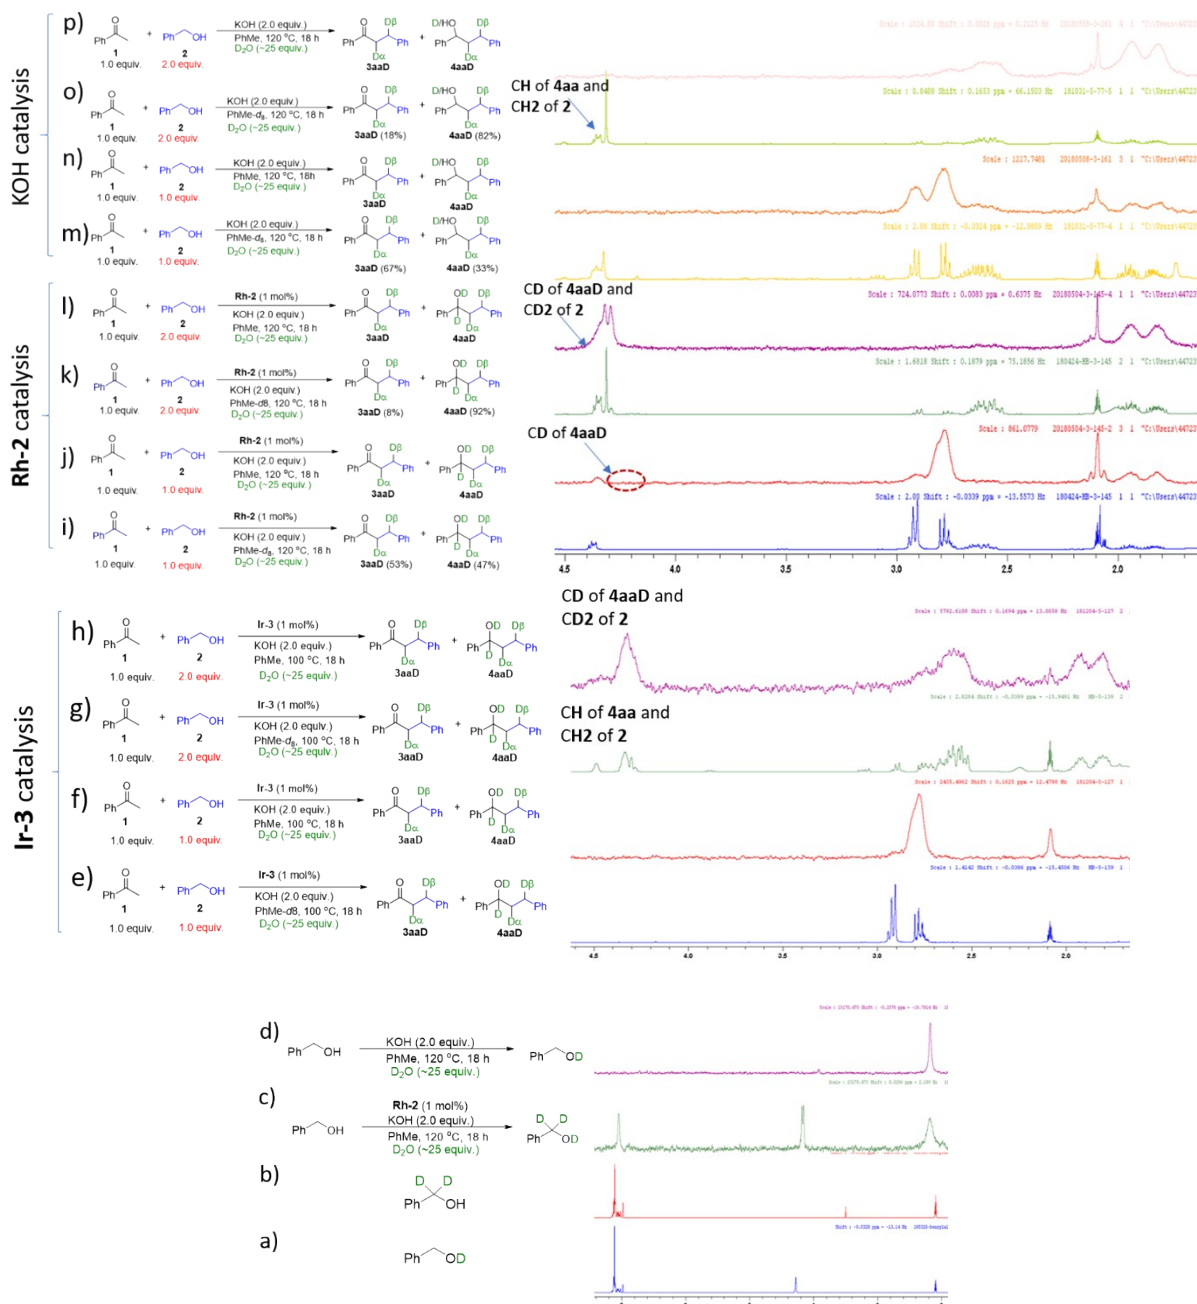

**Scheme S5.** Selected region of <sup>1</sup>H (400 MHz, PhMe-*d*<sub>8</sub>, 298 K) and <sup>2</sup>H (77 MHz, toluene, 298 K) NMR spectra. Compare **Rh-2** and **Ir-3** catalysts and KOH promoted reactions, additional D<sub>2</sub>O was added to the system to observe H/D scrambling. **a) - b)** The <sup>1</sup>H NMR spectra of two version of deuterated benzyl alcohols in toluene-*d*<sub>8</sub>. **c) - d)** The <sup>2</sup>H NMR spectra for comparing the reactions using base KOH and **Rh-2** catalyst in the presence of 1.0 equivalent of benzyl alcohol and additional D<sub>2</sub>O. **e) - p)** The <sup>1</sup>H and <sup>2</sup>H spectra NMR for comparing the reaction conditions.

## S1.7.2 Deuterium labelling experiments

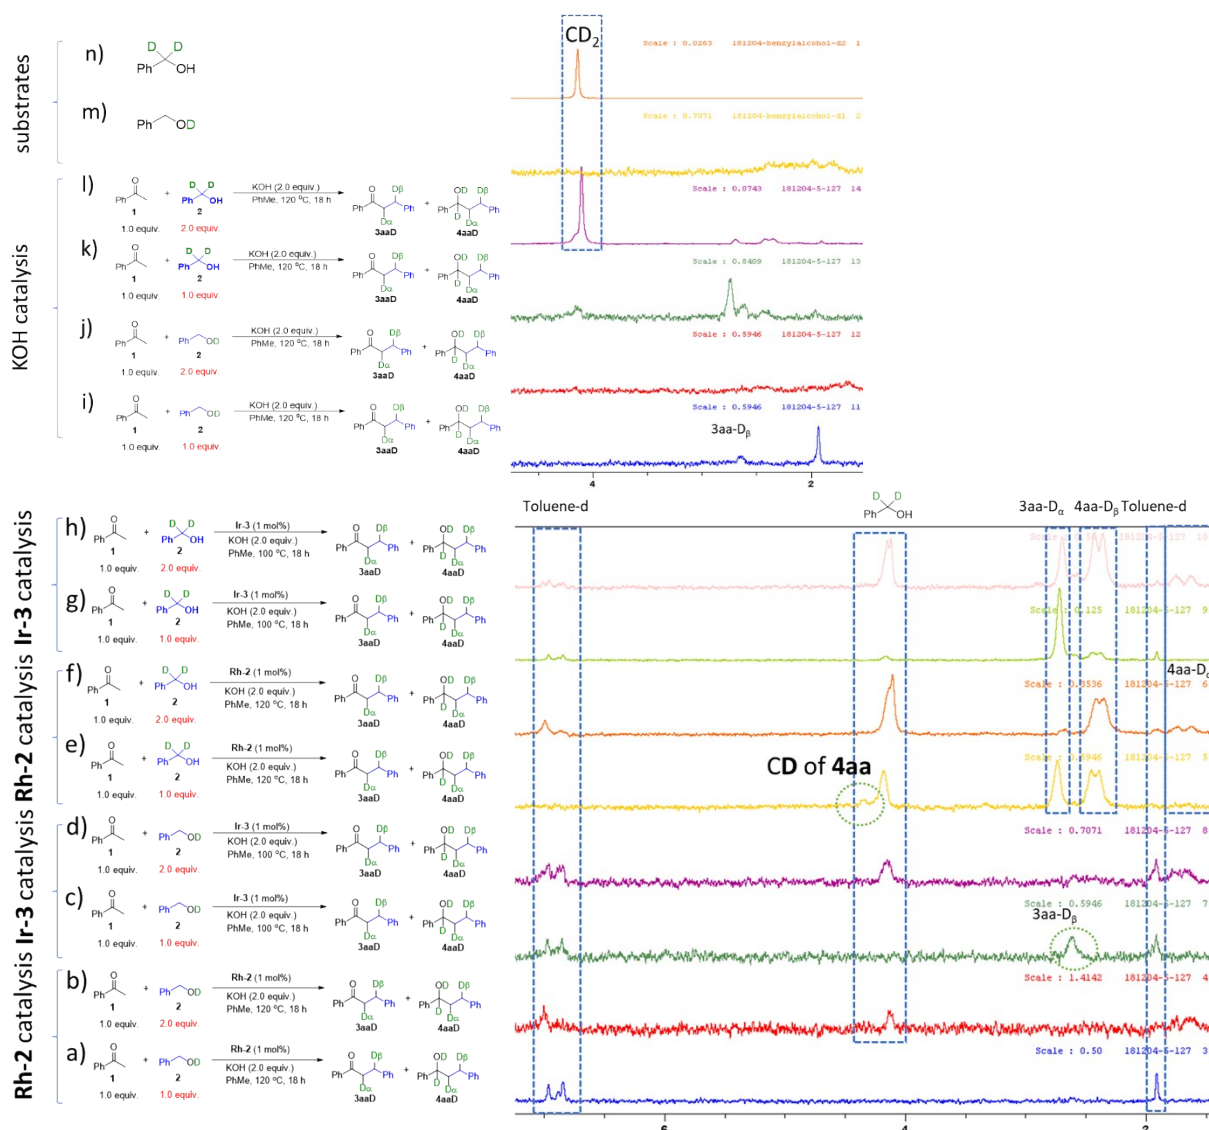

**Scheme S6.** Selected region of  $^2\text{H}$  (77 MHz, toluene, 298 K) NMR spectra. Comparisons amongst **Rh-2**, **Ir-3** catalysts and KOH only promoted reactions, benzyl alcohol **2a-OD<sub>1</sub>** and benzyl alcohol **2a-CD<sub>2</sub>** are used as the deuterated substrates, respectively. Substrate ratio of **1** and **2** at 1:1 and 1:2 were examined, reaction conditions from **a**) to **l**) are depicted in the scheme. In some cases, H/D scrambling was observed in toluene.

## S1.8 $^1\text{H}$ , $^{13}\text{C}\{^1\text{H}\}$ NMR data of catalysis products

### S1.8.1 Ketone scope for the alkylated ketones

#### 3ba 3-phenyl-1-(*p*-tolyl)propan-1-one

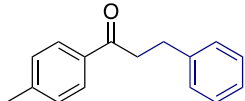  $^1\text{H}$  NMR (400 MHz, Chloroform-*d*)  $\delta$  7.90 – 7.78 (m, 1H), 7.33 – 7.13 (m, 4H), 3.33 – 3.18 (m, 1H), 3.04 (dd,  $J$  = 8.6, 6.8 Hz, 1H), 2.37 (s, 2H) ppm.  $^{13}\text{C}\{^1\text{H}\}$  NMR (101 MHz, Chloroform-*d*)  $\delta$  198.9, 143.9, 141.5, 134.5, 129.3, 128.6, 128.5, 128.2, 126.2, 40.4, 30.3, 21.7 ppm.

#### 3ca 3-phenyl-1-(*m*-tolyl)propan-1-one

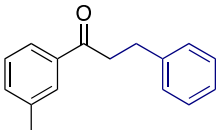  $^1\text{H}$  NMR (400 MHz, Chloroform-*d*)  $\delta$  7.82 – 7.73 (m, 2H), 7.44 – 7.17 (m, 8H), 3.36 – 3.23 (m, 2H), 3.07 (dd,  $J$  = 8.6, 6.9 Hz, 2H), 2.41 (d,  $J$  = 0.7 Hz, 3H) ppm.  $^{13}\text{C}\{^1\text{H}\}$  NMR (101 MHz, Chloroform-*d*)  $\delta$  199.6, 141.5, 138.5, 137.0, 134.0, 128.7, 128.7, 128.6, 128.6, 126.2, 125.38, 40.7, 30.3, 21.5 ppm.

#### 3da 3-phenyl-1-(*o*-tolyl)propan-1-one

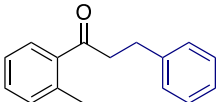  $^1\text{H}$  NMR (400 MHz, Chloroform-*d*)  $\delta$  7.61 (dd,  $J$  = 8.0, 1.4 Hz, 1H), 7.37 (td,  $J$  = 7.5, 1.4 Hz, 1H), 7.33 – 7.28 (m, 2H), 7.27 – 7.14 (m, 6H), 3.28 – 3.20 (m, 2H), 3.06 (dd,  $J$  = 8.4, 6.9 Hz, 2H), 2.48 (s, 3H) ppm.  $^{13}\text{C}\{^1\text{H}\}$  NMR (101 MHz, Chloroform-*d*)  $\delta$  203.5, 141.3, 138.2, 138.0, 132.1, 131.4, 128.6, 128.5, 128.5, 126.2, 125.8, 43.3, 30.5, 21.4 ppm.

#### 3ea 1-(4-methoxyphenyl)-3-phenylpropan-1-one

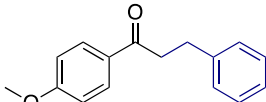  $^1\text{H}$  NMR (400 MHz, Chloroform-*d*)  $\delta$  7.98 – 7.92 (m, 2H), 7.34 – 7.18 (m, 5H), 6.96 – 6.88 (m, 2H), 3.87 (s, 3H), 3.30 – 3.22 (m, 2H), 3.06 (dd,  $J$  = 8.7, 6.8 Hz, 2H) ppm.  $^{13}\text{C}\{^1\text{H}\}$  NMR (101 MHz, Chloroform-*d*)  $\delta$  198.0, 163.6, 141.6, 130.3 (d,  $J$  = 34.1 Hz), 128.6 (d,  $J$  = 8.0 Hz), 126.2, 113.9, 55.6, 40.3, 30.5 ppm.

#### 3fa 1-(3-methoxyphenyl)-3-phenylpropan-1-one

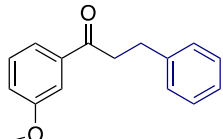  $^1\text{H}$  NMR (400 MHz, Chloroform-*d*)  $\delta$  7.54 (ddd,  $J$  = 7.7, 1.6, 1.0 Hz, 1H), 7.50 (dd,  $J$  = 2.7, 1.5 Hz, 1H), 7.36 (t,  $J$  = 7.9 Hz, 1H), 7.34 – 7.24 (m, 4H), 7.24 – 7.19 (m, 1H), 7.11 (ddd,  $J$  = 8.2, 2.7, 1.0 Hz, 1H), 3.85 (s, 3H), 3.34 – 3.26 (m, 2H), 3.08 (dd,  $J$  = 8.5, 6.9 Hz, 2H) ppm.  $^{13}\text{C}\{^1\text{H}\}$  NMR (101 MHz,

Chloroform-*d*)  $\delta$  199.2, 160.0, 141.4, 138.3, 129.7, 128.7, 128.6, 126.3, 120.8, 119.7, 112.4, 55.6, 40.7, 30.3 ppm.

**3ga** 1-(2-methoxyphenyl)-3-phenylpropan-1-one

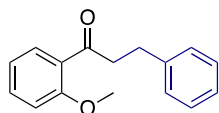

$^1\text{H}$  NMR (400 MHz, Chloroform-*d*)  $\delta$  7.60 (dd,  $J = 7.7, 1.8$  Hz, 1H), 7.36 (ddd,  $J = 8.4, 7.3, 1.9$  Hz, 1H), 7.23 – 7.02 (m, 6H), 6.90 (td,  $J = 7.5, 1.0$  Hz, 1H), 6.86 (dd,  $J = 8.4, 1.0$  Hz, 1H), 3.78 (s, 3H), 3.25 – 3.18 (m, 2H), 2.94 (dd,  $J = 8.6, 7.0$  Hz, 2H) ppm.  $^{13}\text{C}\{^1\text{H}\}$  NMR (101 MHz, Chloroform-*d*)  $\delta$  201.8, 158.6, 141.8, 133.5, 130.5, 129.2, 128.6, 128.5, 128.4, 128.3, 126.0, 120.8, 111.6, 55.6, 45.5, 30.6 ppm.

**3ha** 1-(4-fluorophenyl)-3-phenylpropan-1-one

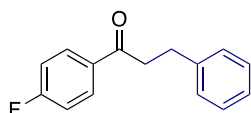

$^1\text{H}$  NMR (400 MHz, Chloroform-*d*)  $\delta$  8.03 – 7.94 (m, 2H), 7.35 – 7.28 (m, 2H), 7.26 – 7.18 (m, 2H), 7.16 – 7.07 (m, 2H), 3.32 – 3.23 (m, 2H), 3.07 (dd,  $J = 8.5, 6.9$  Hz, 2H) ppm.  $^{13}\text{C}\{^1\text{H}\}$  NMR (101 MHz, Chloroform-*d*)  $\delta$  197.8, 141.3, 130.8, 130.7, 128.7, 128.6, 126.3, 115.9, 115.7, 40.5, 30.2 ppm.

**3ia** 1-(4-bromophenyl)-3-phenylpropan-1-one

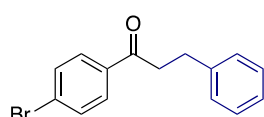

$^1\text{H}$  NMR (400 MHz, Chloroform-*d*)  $\delta$  7.86 – 7.78 (m, 2H), 7.64 – 7.54 (m, 2H), 7.34 – 7.27 (m, 2H), 7.26 – 7.18 (m, 3H), 3.34 – 3.19 (m, 2H), 3.06 (dd,  $J = 8.4, 6.9$  Hz, 2H) ppm.  $^{13}\text{C}\{^1\text{H}\}$  NMR (101 MHz, Chloroform-*d*)  $\delta$  198.3, 141.2, 135.7, 132.1, 129.7, 128.7, 128.5, 128.4, 126.4, 40.6, 30.2 ppm.

**3ja** 1-(3-bromophenyl)-3-phenylpropan-1-one

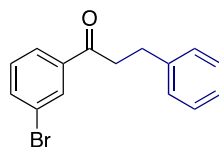

$^1\text{H}$  NMR (400 MHz, Chloroform-*d*)  $\delta$  8.08 (t,  $J = 1.8$  Hz, 1H), 7.87 (ddd,  $J = 7.8, 1.7, 1.0$  Hz, 1H), 7.68 (ddd,  $J = 8.0, 2.0, 1.1$  Hz, 1H), 7.40 – 7.17 (m, 7H), 3.31 – 3.24 (m, 2H), 3.07 (dd,  $J = 8.4, 6.9$  Hz, 2H) ppm.  $^{13}\text{C}\{^1\text{H}\}$  NMR (101 MHz, Chloroform-*d*)  $\delta$  197.9, 141.1, 138.7, 136.1, 131.3, 130.4, 128.7, 128.6, 126.7, 126.4, 123.1, 40.7, 30.1 ppm.

**3ka** 1-mesityl-3-phenylpropan-1-one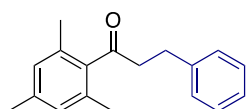

$^1\text{H}$  NMR (400 MHz, Chloroform-*d*)  $\delta$  7.33 – 7.17 (m, 5H), 6.83 (q,  $J$  = 0.7 Hz, 2H), 3.12 – 2.98 (m, 4H), 2.28 (s, 3H), 2.12 (s, 6H) ppm.

$^{13}\text{C}\{^1\text{H}\}$  NMR (101 MHz, Chloroform-*d*)  $\delta$  209.8, 141.1, 139.6, 138.5, 132.7, 128.6, 128.6, 126.3, 46.5, 29.6, 21.2, 19.2 ppm.

**3ma** 2,6-dibenzylcyclohexan-1-one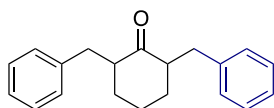

$^1\text{H}$  NMR (400 MHz, Chloroform-*d*)  $\delta$  7.31 – 7.23 (m, 4H), 7.23 – 7.13 (m, 6H), 3.24 (dd,  $J$  = 13.9, 4.8 Hz, 2H), 2.58 (dddd,  $J$  = 13.4, 10.0, 4.3, 1.2 Hz, 2H), 2.44 (dd,  $J$  = 13.9, 8.6 Hz, 2H), 2.13 – 2.00 (m, 2H), 1.84 – 1.71 (m, 1H), 1.69 – 1.48 (m, 2H), 1.35 (qd,  $J$  = 13.1, 3.8 Hz, 2H) ppm.

$^{13}\text{C}\{^1\text{H}\}$  NMR (101 MHz, Chloroform-*d*)  $\delta$  211.8, 139.56, 128.1, 127.3, 124.9, 51.9, 34.5, 33.8, 24.3 ppm.

**3na** 2-benzyl-3,4-dihydronaphthalen-1(2H)-one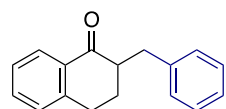

$^1\text{H}$  NMR (400 MHz, Chloroform-*d*)  $\delta$  8.05 (dd,  $J$  = 7.9, 1.4 Hz, 1H), 7.43 (td,  $J$  = 7.5, 1.5 Hz, 1H), 7.28 (ddt,  $J$  = 7.8, 6.8, 1.1 Hz, 3H), 7.20 (ddt,  $J$  = 7.6, 5.6, 2.4 Hz, 4H), 3.46 (dt,  $J$  = 14.0, 4.3 Hz, 1H), 3.00 – 2.81 (m, 2H), 2.72 (ddt,  $J$  = 11.4, 9.6, 4.2 Hz, 1H), 2.67 – 2.57 (m, 1H), 2.08 (dq,  $J$  = 13.4, 4.5 Hz, 1H), 1.76 (dddd,  $J$  = 13.4, 11.6, 10.0, 5.6 Hz, 1H) ppm.  $^{13}\text{C}\{^1\text{H}\}$  NMR (101 MHz, Chloroform-*d*)  $\delta$  199.5, 144.2, 140.2, 133.4, 132.6, 129.4, 128.8, 128.5, 127.7, 126.7, 126.3, 49.6, 35.8, 35.7, 28.8, 28.7, 27.8, 27.7 ppm.

**3oa** 1-(naphthalen-2-yl)-3-phenylpropan-1-one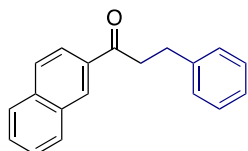

$^1\text{H}$  NMR (400 MHz, Chloroform-*d*)  $\delta$  8.55 (ddt,  $J$  = 8.6, 1.5, 0.8 Hz, 1H), 7.98 (dt,  $J$  = 8.4, 1.2 Hz, 1H), 7.91 – 7.85 (m, 1H), 7.82 (dd,  $J$  = 7.2, 1.3 Hz, 1H), 7.64 – 7.51 (m, 2H), 7.47 (dd,  $J$  = 8.2, 7.2 Hz, 1H), 7.34 – 7.18 (m, 6H), 3.43 – 3.36 (m, 2H), 3.15 (dd,  $J$  = 8.4, 7.0 Hz, 2H) ppm.  $^{13}\text{C}\{^1\text{H}\}$  NMR (101 MHz, Chloroform-*d*)  $\delta$  203.7, 141.3, 136.1, 134.1, 132.7, 130.3, 128.7, 128.6, 128.6, 128.0, 127.5, 126.6, 126.3, 125.9, 124.5, 44.0, 30.7 ppm.

### S1.8.2 Alcohol scope for the alkylated ketones

#### 3ab 1-phenyl-3-(*p*-tolyl)propan-1-one

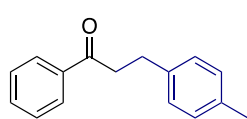

$^1\text{H}$  NMR (400 MHz, Chloroform-*d*)  $\delta$  7.99 – 7.91 (m, 1H), 7.59 – 7.53 (m, 1H), 7.49 – 7.42 (m, 1H), 6.77 – 6.67 (m, 1H), 5.92 (s, 1H), 3.31 – 3.21 (m, 1H), 3.03 – 2.95 (m, 1H) ppm.

$^{13}\text{C}\{^1\text{H}\}$  NMR (101 MHz, Chloroform-*d*)  $\delta$  199.3, 147.8, 146.0, 137.0, 135.2, 133.2, 128.8, 128.2, 121.3, 109.1, 108.4, 101.0, 40.8, 30.0 ppm.

#### 3ac 3-(4-methoxyphenyl)-1-phenylpropan-1-one

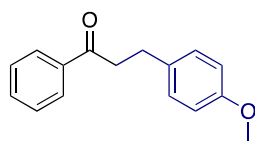

$^1\text{H}$  NMR (400 MHz, Chloroform-*d*)  $\delta$  7.99 – 7.93 (m, 2H), 7.60 – 7.51 (m, 1H), 7.49 – 7.42 (m, 2H), 7.22 – 7.14 (m, 2H), 6.89 – 6.81 (m, 2H), 3.79 (s, 3H), 3.31 – 3.24 (m, 2H), 3.02 (dd,  $J$  = 8.4, 6.9 Hz, 2H) ppm.

$^{13}\text{C}\{^1\text{H}\}$  NMR (101 MHz, Chloroform-*d*)  $\delta$  199.5, 158.1, 137.0, 133.4, 133.2, 129.5, 128.7, 128.2, 114.1, 55.4, 40.8, 29.4 ppm.

#### 3ad 1-phenyl-3-(*o*-tolyl)propan-1-one

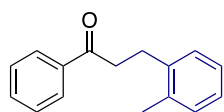

$^1\text{H}$  NMR (400 MHz, Chloroform-*d*)  $\delta$  8.02 – 7.95 (m, 2H), 7.62 – 7.53 (m, 1H), 7.52 – 7.43 (m, 2H), 7.26 – 7.10 (m, 4H), 3.31 – 3.23 (m, 2H), 3.07 (dd,  $J$  = 9.1, 6.6 Hz, 2H), 2.37 (s, 3H) ppm.  $^{13}\text{C}\{^1\text{H}\}$  NMR (101 MHz,

Chloroform-*d*)  $\delta$  199.5, 139.5, 137.0, 136.1, 133.2, 130.5, 128.9, 128.7, 128.2, 126.4, 126.3, 39.2, 27.6, 19.5 ppm.

#### 3ae 3-(3,5-dimethoxyphenyl)-1-phenylpropan-1-one

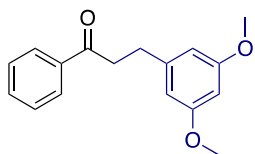

$^1\text{H}$  NMR (400 MHz, Chloroform-*d*)  $\delta$  8.00 – 7.93 (m, 2H), 7.60 – 7.52 (m, 1H), 7.50 – 7.41 (m, 2H), 6.42 (d,  $J$  = 2.2 Hz, 2H), 6.33 (t,  $J$  = 2.3 Hz, 1H), 3.78 (s, 6H), 3.34 – 3.25 (m, 2H), 3.02 (dd,  $J$  = 8.5, 6.9 Hz,

2H) ppm.  $^{13}\text{C}\{^1\text{H}\}$  NMR (101 MHz, Chloroform-*d*)  $\delta$  199.3, 161.0, 143.8, 137.0, 133.2, 128.7, 128.2, 106.6, 98.2, 55.4, 40.4, 30.6 ppm.

#### 3af 3-(4-fluorophenyl)-1-phenylpropan-1-one

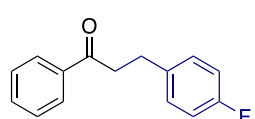

$^1\text{H}$  NMR (400 MHz, Chloroform-*d*)  $\delta$  8.00 – 7.91 (m, 1H), 7.61 – 7.51 (m, 1H), 7.50 – 7.42 (m, 1H), 7.24 – 7.17 (m, 1H), 7.02 – 6.93 (m, 1H), 3.33 – 3.24 (m, 1H), 3.05 (t,  $J$  = 7.6 Hz, 1H) ppm.  $^{13}\text{C}\{^1\text{H}\}$  NMR (101

MHz, Chloroform-*d*)  $\delta$  199.2, 162.8, 137.0, 137.0, 137.0, 133.3, 130.0, 129.9, 128.8, 128.2, 115.5, 115.3, 40.6, 29.4 ppm.P

**3ag** 3-(4-chlorophenyl)-1-phenylpropan-1-one

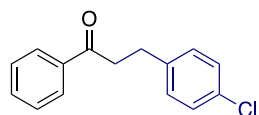

$^1\text{H}$  NMR (400 MHz, Chloroform-*d*)  $\delta$  7.99 – 7.91 (m, 1H), 7.60 – 7.53 (m, 1H), 7.49 – 7.42 (m, 1H), 7.29 – 7.23 (m, 1H), 7.21 – 7.16 (m, 1H), 3.33 – 3.24 (m, 1H), 3.05 (t,  $J = 7.5$  Hz, 1H) ppm.  $^{13}\text{C}\{^1\text{H}\}$  NMR (101 MHz, Chloroform-*d*)  $\delta$  199.0, 139.9, 136.9, 133.3, 132.0, 130.0, 128.8, 128.7, 128.2, 40.3, 29.5 ppm.

**3ah** 3-(4-bromophenyl)-1-phenylpropan-1-one

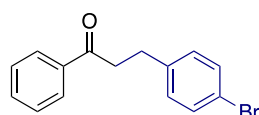

$^1\text{H}$  NMR (400 MHz, Chloroform-*d*)  $\delta$  7.98 – 7.91 (m, 2H), 7.60 – 7.53 (m, 1H), 7.49 – 7.43 (m, 2H), 7.43 – 7.38 (m, 2H), 7.17 – 7.10 (m, 2H), 3.33 – 3.23 (m, 2H), 3.03 (t,  $J = 7.5$  Hz, 2H) ppm.  $^{13}\text{C}\{^1\text{H}\}$  NMR (101 MHz, Chloroform-*d*)  $\delta$  198.9, 140.4, 136.9, 133.3, 131.7, 130.4, 128.8, 128.1, 120.0, 40.2, 29.6 ppm.

**3aj** 3-(furan-2-yl)-1-phenylpropan-1-one

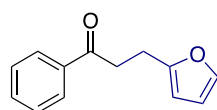

$^1\text{H}$  NMR (400 MHz, Chloroform-*d*)  $\delta$  8.01 – 7.94 (m, 2H), 7.61 – 7.53 (m, 1H), 7.51 – 7.42 (m, 2H), 7.31 (dd,  $J = 1.9, 0.9$  Hz, 1H), 6.29 (dd,  $J = 3.1, 1.9$  Hz, 1H), 6.08 – 6.03 (m, 1H), 3.39 – 3.31 (m, 2H), 3.15 – 3.05 (m, 2H) ppm.  $^{13}\text{C}\{^1\text{H}\}$  NMR (101 MHz, Chloroform-*d*)  $\delta$  198.7, 154.8, 141.1, 136.8, 133.2, 128.6, 128.1, 110.3, 105.3, 37.00, 22.5 ppm.

**3ak** 1-phenyl-3-(pyridin-3-yl)propan-1-one

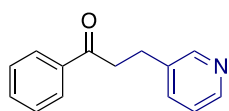

$^1\text{H}$  NMR (400 MHz, Chloroform-*d*)  $\delta$  8.53 (s, 1H), 8.45 (d,  $J = 4.7$  Hz, 1H), 7.98 – 7.91 (m, 2H), 7.57 (ddt,  $J = 12.9, 6.9, 1.7$  Hz, 2H), 7.49 – 7.42 (m, 2H), 7.21 (dd,  $J = 7.8, 4.8$  Hz, 1H), 3.31 (dd,  $J = 7.8, 7.0$  Hz, 2H), 3.08 (t,  $J = 7.4$  Hz, 2H) ppm.  $^{13}\text{C}\{^1\text{H}\}$  NMR (101 MHz, Chloroform-*d*)  $\delta$  198.6, 150.1, 147.8, 136.8, 136.2, 133.4, 128.8, 128.1, 123.5, 39.9, 27.2 ppm.

**3al** 3-(benzo[*d*][1,3]dioxol-5-yl)-1-phenylpropan-1-one

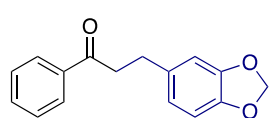

$^1\text{H}$  NMR (400 MHz, Chloroform-*d*)  $\delta$  7.99 – 7.92 (m, 2H), 7.60 – 7.52 (m, 1H), 7.49 – 7.41 (m, 2H), 6.77 – 6.67 (m, 3H), 5.92 (s, 2H), 3.34 – 3.18 (m, 2H), 3.07 – 2.93 (m, 2H) ppm.  $^{13}\text{C}\{^1\text{H}\}$  NMR (101 MHz, Chloroform-*d*)  $\delta$  199.3, 147.8, 146.0, 137.0, 135.2, 133.2, 128.7, 128.1, 121.3, 109.0, 108.4, 100.9, 40.8, 30.0 ppm.

**3an** 3-cyclohexyl-1-phenylpropan-1-one

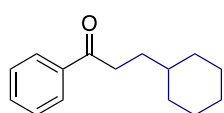

$^1\text{H}$  NMR (400 MHz, Chloroform-*d*)  $\delta$  7.99 – 7.92 (m, 2H), 7.59 – 7.51 (m, 1H), 7.51 – 7.40 (m, 2H), 3.02 – 2.93 (m, 2H), 1.74 (dddd,  $J = 18.2, 11.5, 3.3, 1.5$  Hz, 4H), 1.68 – 1.60 (m, 3H), 1.37 – 1.09 (m, 5H), 1.01 – 0.88 (m, 2H) ppm.  $^{13}\text{C}\{^1\text{H}\}$  NMR (101 MHz, Chloroform-*d*)  $\delta$  201.1, 137.2, 133.0, 128.7, 128.2, 37.6, 36.3, 33.4, 31.9, 26.7, 26.4 ppm.

**3ao** 1-phenyldodecan-1-one

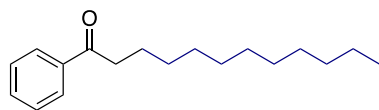

$^1\text{H}$  NMR (400 MHz, Chloroform-*d*)  $\delta$  8.00 – 7.92 (m, 2H), 7.59 – 7.52 (m, 1H), 7.46 (dd,  $J = 8.3, 6.8$  Hz, 2H), 2.96 (t,  $J = 7.4$  Hz, 2H), 1.74 (q,  $J = 7.3$  Hz, 2H), 1.46 – 1.12 (m, 18H), 0.88 (t,  $J = 6.8$  Hz, 3H) ppm.  $^{13}\text{C}\{^1\text{H}\}$  NMR (101 MHz, Chloroform-*d*)  $\delta$  200.8, 137.3, 133.0, 128.7, 128.2, 38.8, 32.1, 29.8, 29.7, 29.6, 29.5, 29.5, 24.5, 22.8, 14.3 ppm.

### S1.8.3 Scope for the alkylated alcohols

**4a** 1,3-diphenylpropan-1-ol

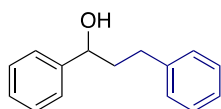

$^1\text{H}$  NMR (400 MHz, Chloroform-*d*)  $\delta$  7.36 (d,  $J = 4.3$  Hz, 4H), 7.33 – 7.26 (m, 3H), 7.23 – 7.16 (m, 3H), 4.70 (dd,  $J = 7.8, 5.3$  Hz, 1H), 2.85 – 2.61 (m, 2H), 2.23 – 1.97 (m, 2H) ppm.  $^{13}\text{C}\{^1\text{H}\}$  NMR (101 MHz, Chloroform-*d*)  $\delta$  144.7, 141.9, 128.7, 128.6, 128.5, 127.8, 126.1, 126.0, 74.0, 40.6, 32.2 ppm.

**4b** 3-phenyl-1-(*p*-tolyl)propan-1-ol

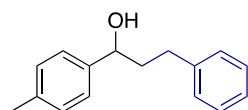

$^1\text{H}$  NMR (400 MHz, Chloroform-*d*)  $\delta$  7.32 – 7.23 (m, 4H), 7.19 (dd,  $J = 11.0, 7.6$  Hz, 5H), 4.66 (dd,  $J = 7.8, 5.5$  Hz, 1H), 2.81 – 2.60 (m, 2H), 2.36 (s, 3H), 2.22 – 1.96 (m, 2H) ppm.  $^{13}\text{C}\{^1\text{H}\}$  NMR (101 MHz, Chloroform-*d*)  $\delta$  142.0, 141.1, 137.5, 129.3, 128.6, 128.5, 126.0, 126.0, 73.9, 40.5, 32.2, 21.3 ppm.



**4d** 1-(4-bromophenyl)-3-phenylpropan-1-ol

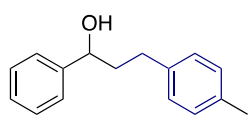

$^1\text{H}$  NMR (400 MHz, Chloroform-*d*)  $\delta$  7.36 (d,  $J = 4.4$  Hz, 4H), 7.33 – 7.27 (m, 1H), 7.10 (s, 4H), 4.69 (dd,  $J = 7.8, 5.4$  Hz, 1H), 2.79 – 2.58 (m, 2H), 2.33 (s, 3H), 2.19 – 1.97 (m, 2H) ppm.  $^{13}\text{C}\{^1\text{H}\}$  NMR (101 MHz, Chloroform-*d*)  $\delta$  144.7, 138.8, 135.4, 129.2, 128.6, 128.4, 127.8, 126.1, 74.0, 40.7, 31.7, 21.1 ppm.

**4e** 3-(4-chlorophenyl)-1-phenylpropan-1-ol

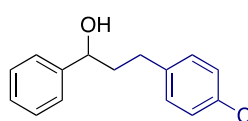

$^1\text{H}$  NMR (400 MHz, Chloroform-*d*)  $\delta$  7.36 (dtd,  $J = 7.2, 6.3, 1.4$  Hz, 4H), 7.32 – 7.27 (m, 1H), 7.27 – 7.18 (m, 2H), 7.15 – 7.09 (m, 2H), 4.66 (dd,  $J = 7.9, 5.3$  Hz, 1H), 2.68 (qdd,  $J = 14.0, 9.5, 6.2$  Hz, 2H), 2.18 – 1.93 (m, 2H) ppm.  $^{13}\text{C}\{^1\text{H}\}$  NMR (101 MHz, Chloroform-*d*)  $\delta$  144.5, 140.4, 131.7, 129.9, 128.7, 128.6, 127.9, 126.0, 73.8, 40.4, 31.5 ppm.

**4f** 3-(benzo[*d*][1,3]dioxol-5-yl)-1-phenylpropan-1-ol

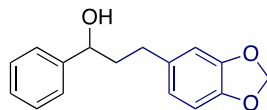

$^1\text{H}$  NMR (400 MHz, Chloroform-*d*)  $\delta$  7.30 – 7.24 (m, 4H), 7.22 – 7.17 (m, 1H), 6.68 – 6.52 (m, 3H), 5.82 (s, 2H), 4.58 (dd,  $J = 7.9, 5.3$  Hz, 1H), 2.64 – 2.46 (m, 2H), 2.07 – 1.84 (m, 2H), 1.81 (s, 1H) ppm.  $^{13}\text{C}\{^1\text{H}\}$  NMR (101 MHz, Chloroform-*d*)  $\delta$  147.7, 145.7, 144.7, 135.7, 128.6, 127.8, 126.03, 121.3, 109.0, 108.3, 100.9, 73.8, 40.8, 31.9 ppm.

**4g** 1-phenyldodecan-1-ol

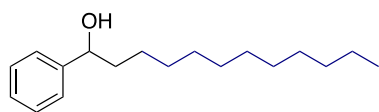

$^1\text{H}$  NMR (400 MHz, Chloroform-*d*)  $\delta$  7.28 (d,  $J = 4.3$  Hz, 4H), 7.24 – 7.17 (m, 1H), 4.59 (dd,  $J = 7.5, 5.8$  Hz, 1H), 1.83 – 1.54 (m, 3H), 1.44 – 1.29 (m, 1H), 1.19 (d,  $J = 10.7$  Hz, 18H), 0.89 – 0.73 (m, 3H) ppm.  $^{13}\text{C}\{^1\text{H}\}$  NMR (101 MHz, Chloroform-*d*)  $\delta$  145.1, 128.6, 127.6, 126.0, 74.9, 39.3, 32.1, 29.8, 29.8, 29.73, 29.7, 29.7, 29.5, 26.00, 22.8, 14.3 ppm.

## S1.9 $^1\text{H}$ , $^{13}\text{C}\{^1\text{H}\}$ NMR spectra of catalysis products

### S1.9.1 Ketone scope for the alkylated ketones

#### 3ba $^1\text{H}$ NMR (400 MHz, Chloroform-*d*)

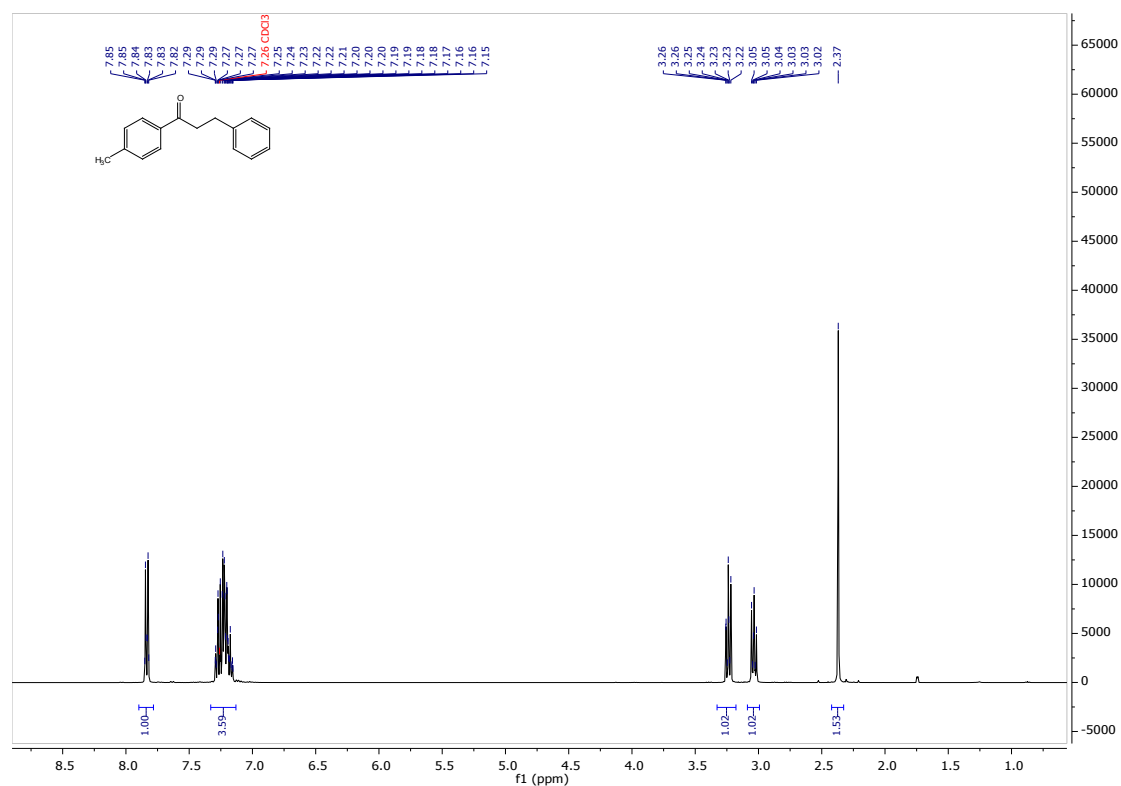

#### 3ba $^{13}\text{C}\{^1\text{H}\}$ NMR (101 MHz, Chloroform-*d*)

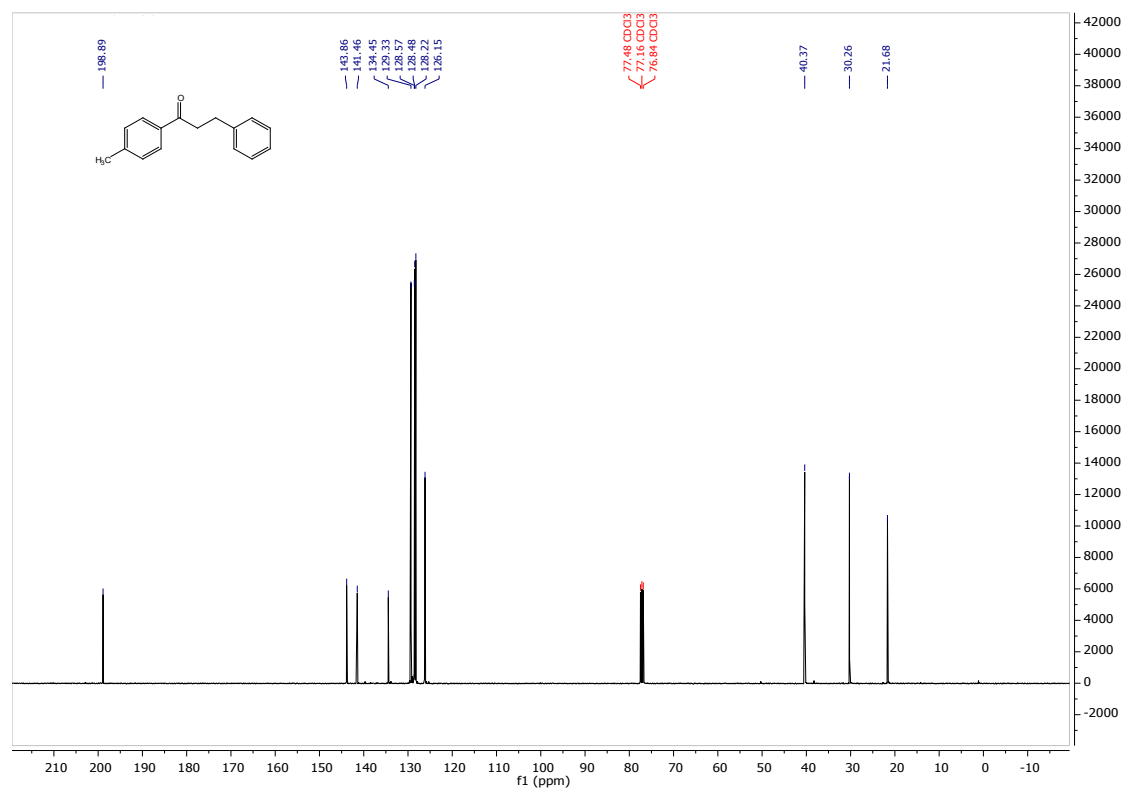

### 3ca <sup>1</sup>H NMR (400 MHz, Chloroform-*d*)

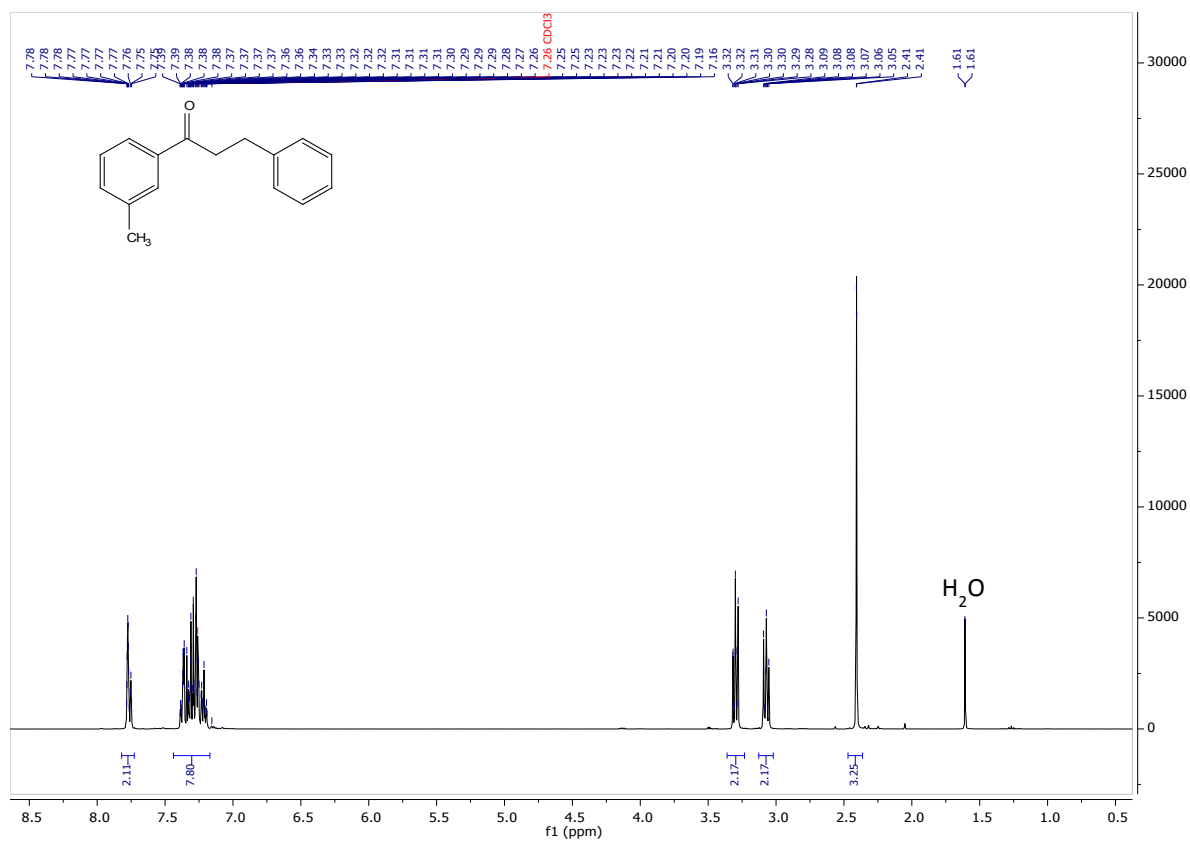

### 3ca <sup>13</sup>C {<sup>1</sup>H} NMR (101 MHz, Chloroform-*d*)

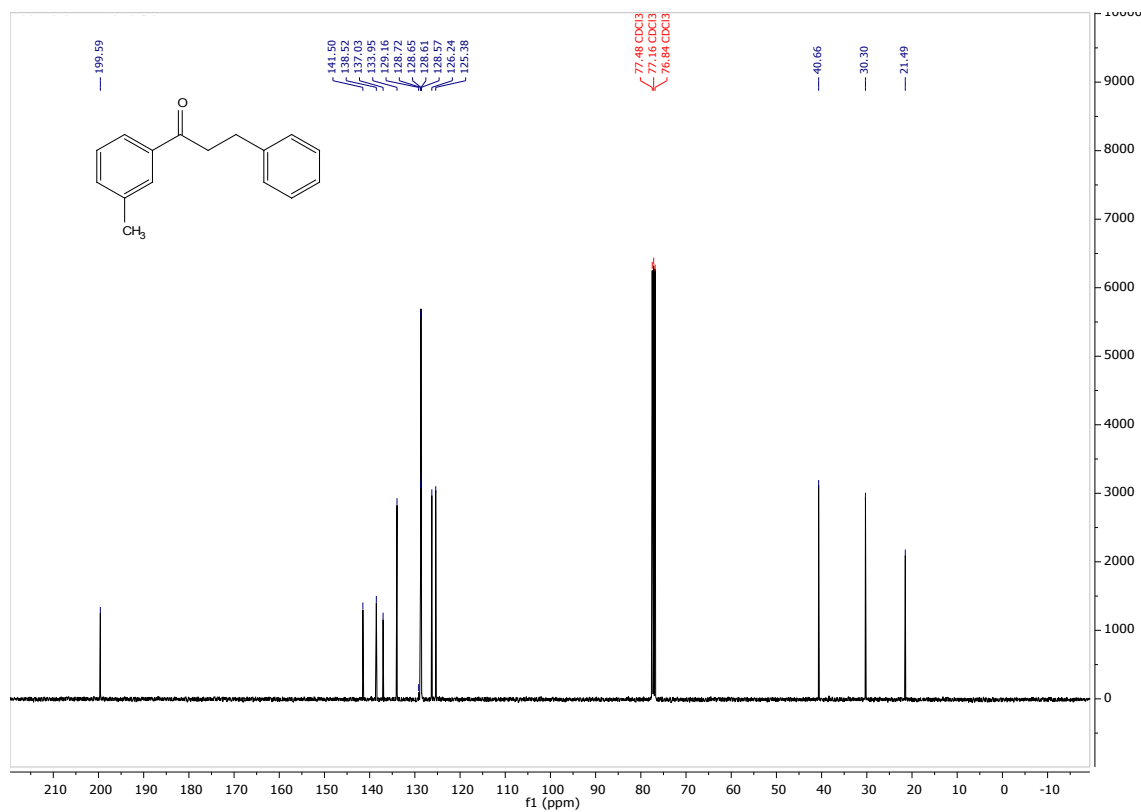

### 3da <sup>1</sup>H NMR (400 MHz, Chloroform-*d*)

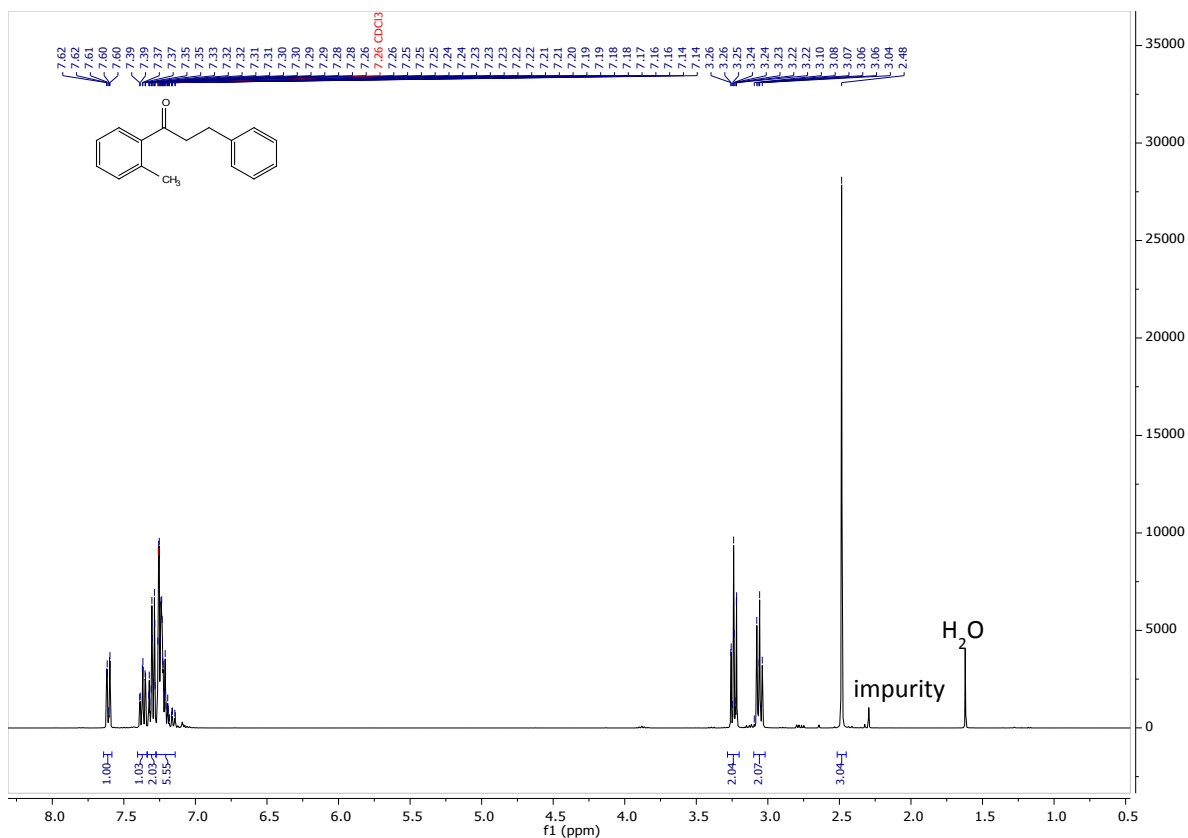

**3da**  $^{13}\text{C}\{^1\text{H}\}$  NMR (101 MHz, Chloroform-*d*)

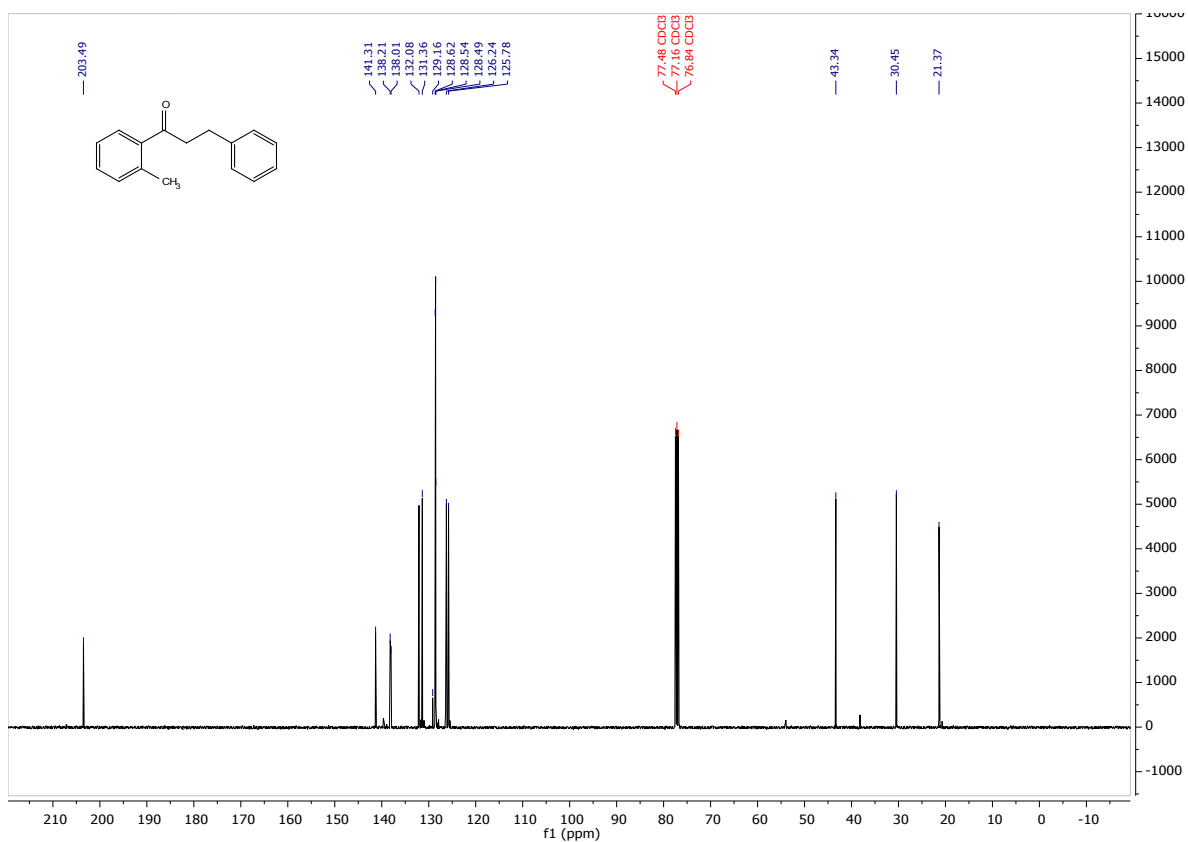

**3ea**  $^1\text{H}$  NMR (400 MHz, Chloroform-*d*)

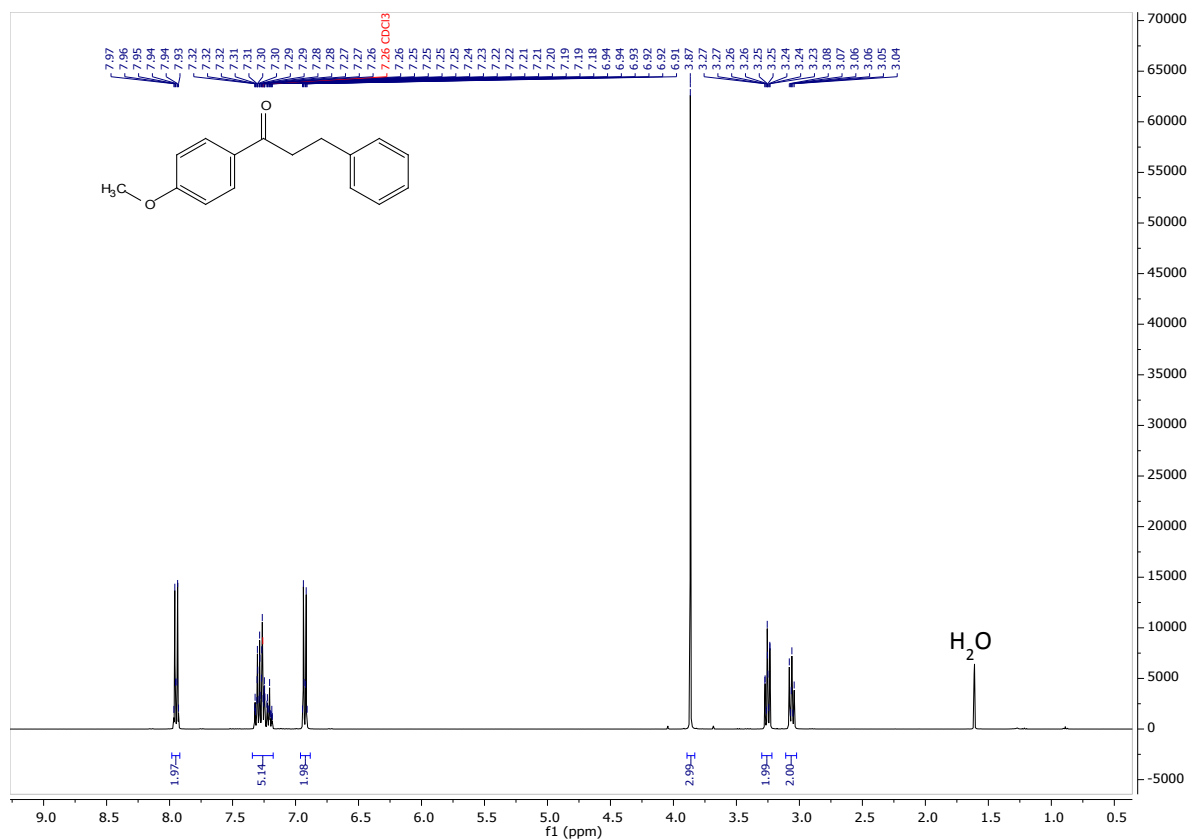

**3ea**  $^{13}\text{C}\{^1\text{H}\}$  NMR (101 MHz, Chloroform-*d*)

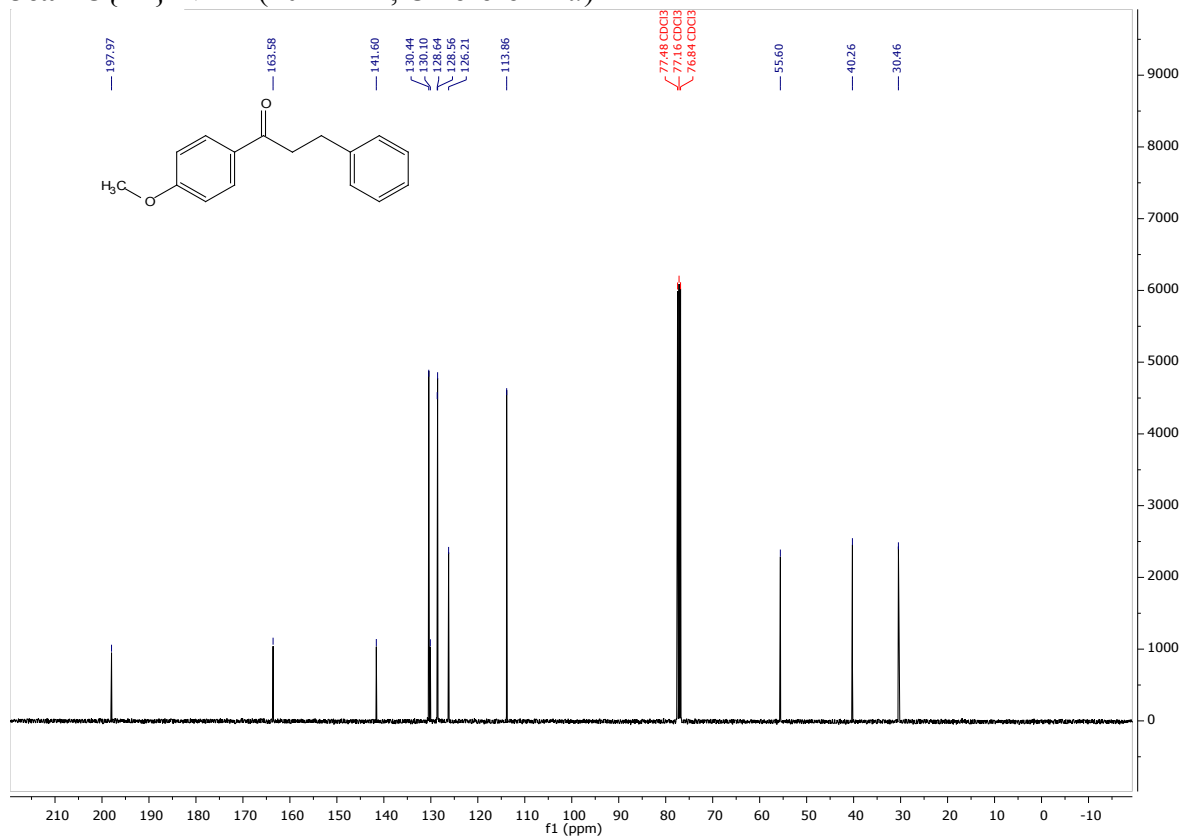

**3fa**  $^1\text{H}$  NMR (400 MHz, Chloroform-*d*)

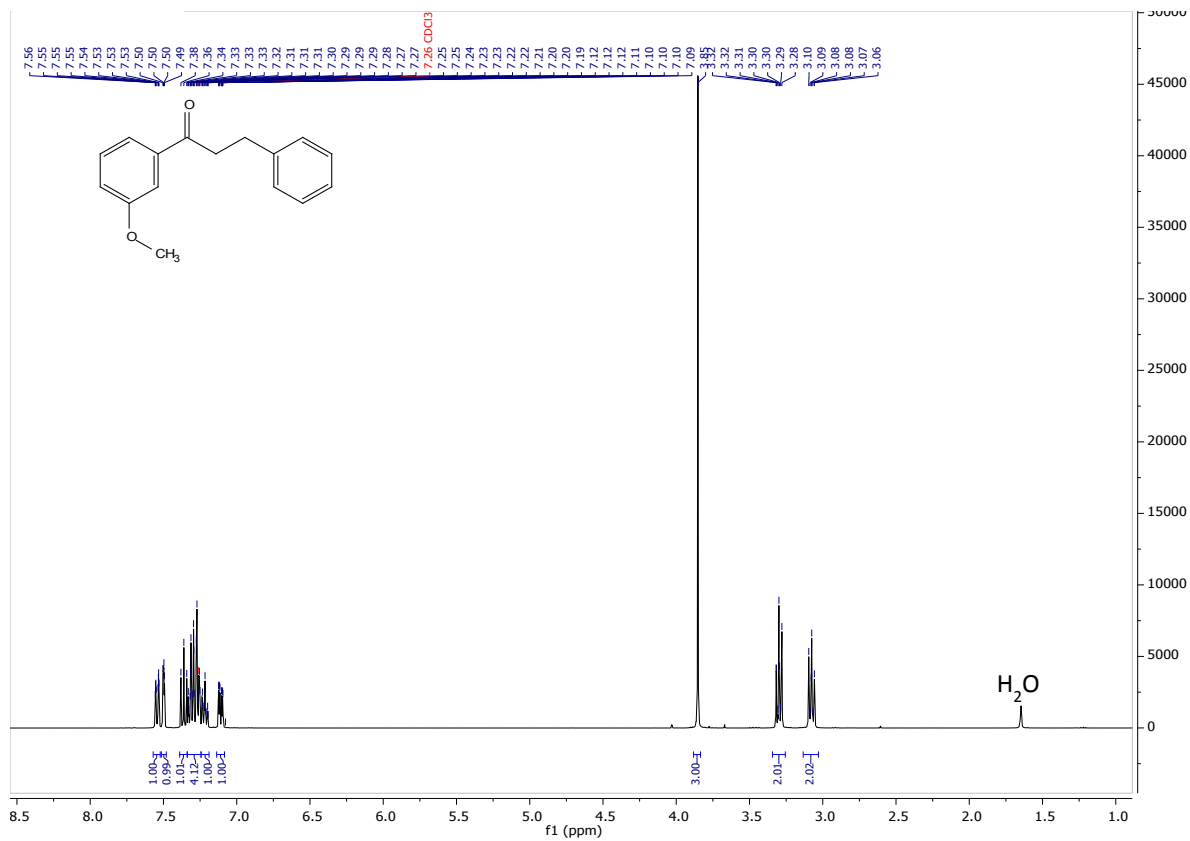

**3fa**  $^{13}\text{C}$  { $^1\text{H}$ } NMR (101 MHz, Chloroform-*d*)

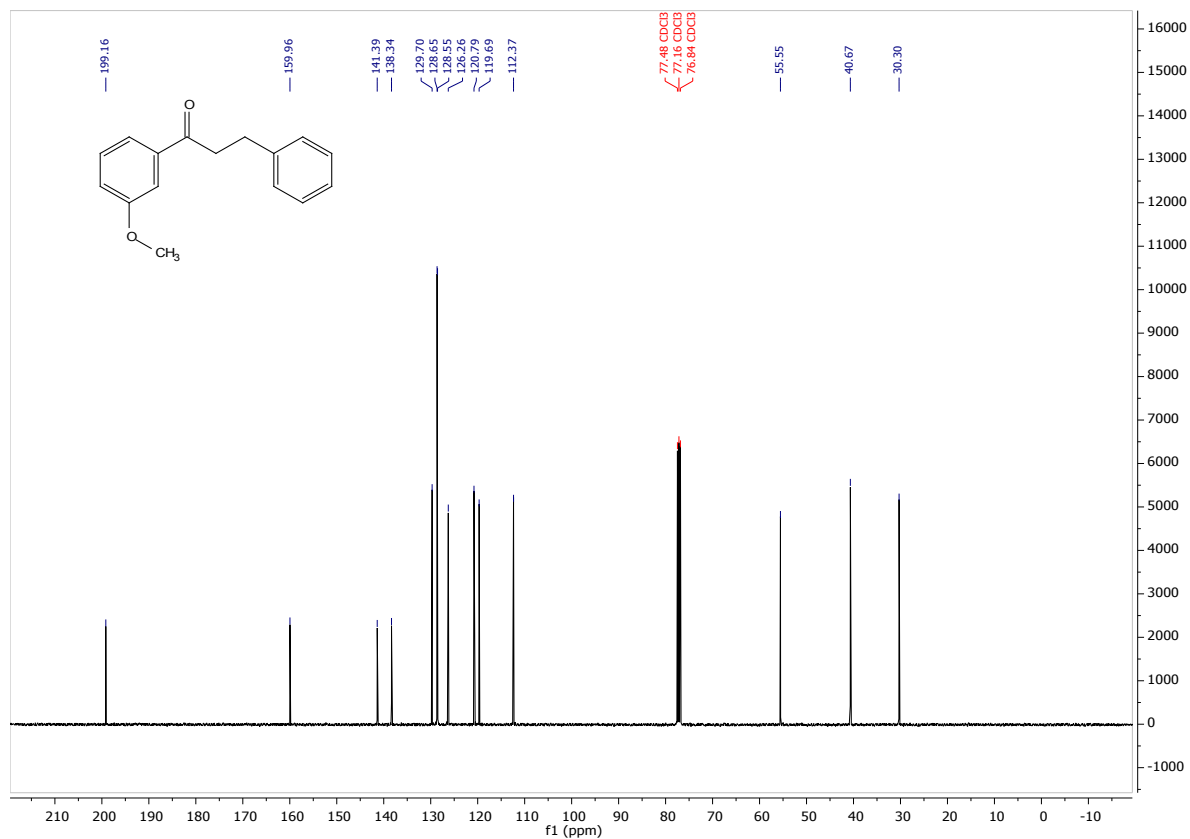

**3ga**  $^1\text{H}$  NMR (400 MHz, Chloroform-*d*)

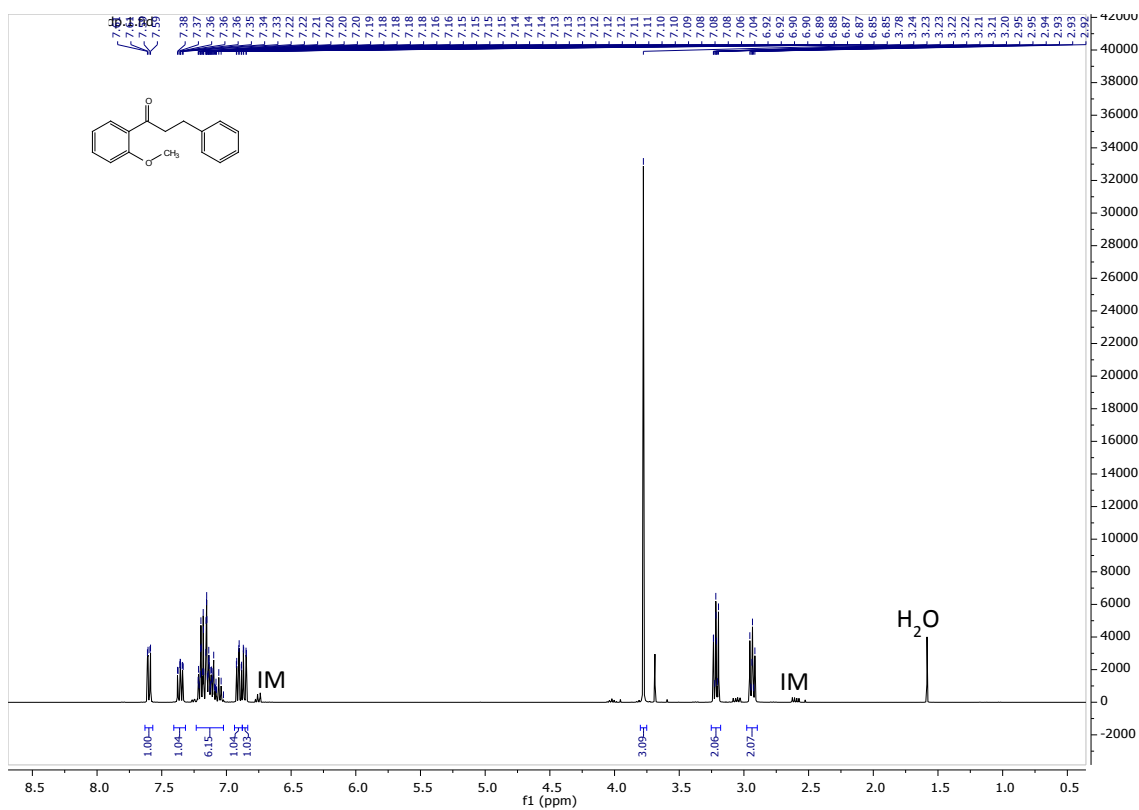

**3ga**  $^{13}\text{C}$  { $^1\text{H}$ } NMR (101 MHz, Chloroform-*d*)

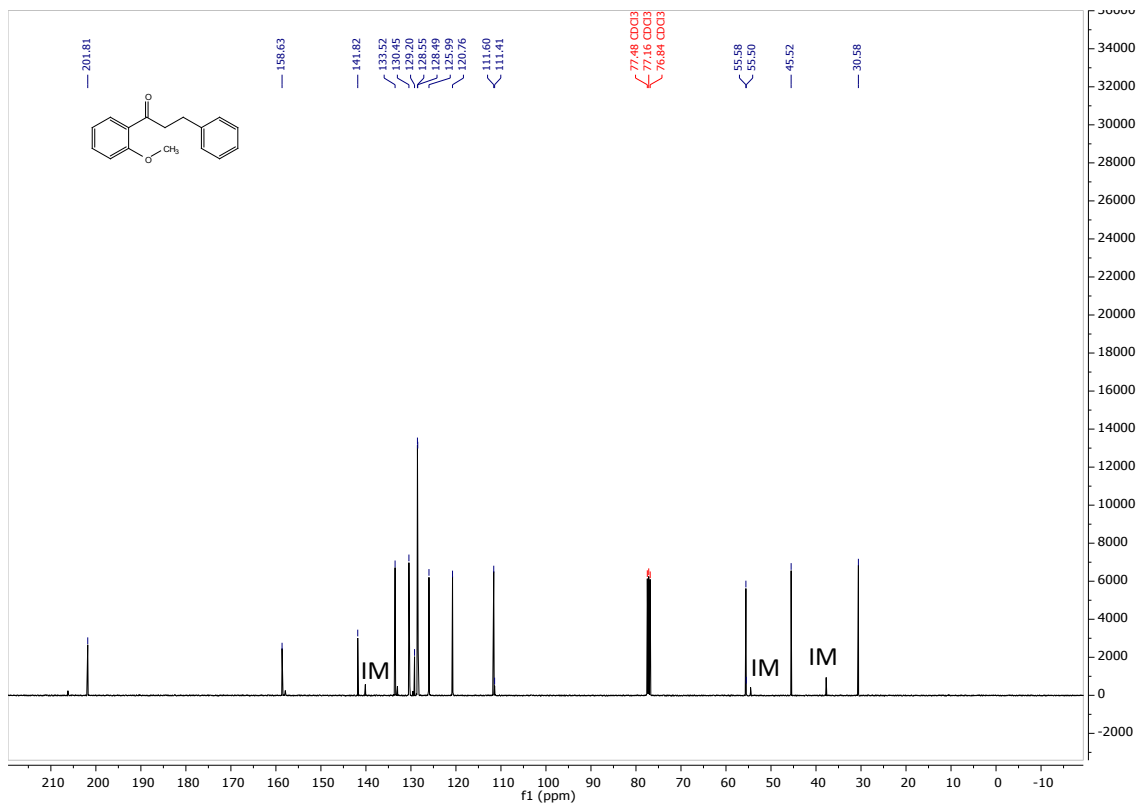

### 3ha <sup>1</sup>H NMR (400 MHz, Chloroform-*d*)

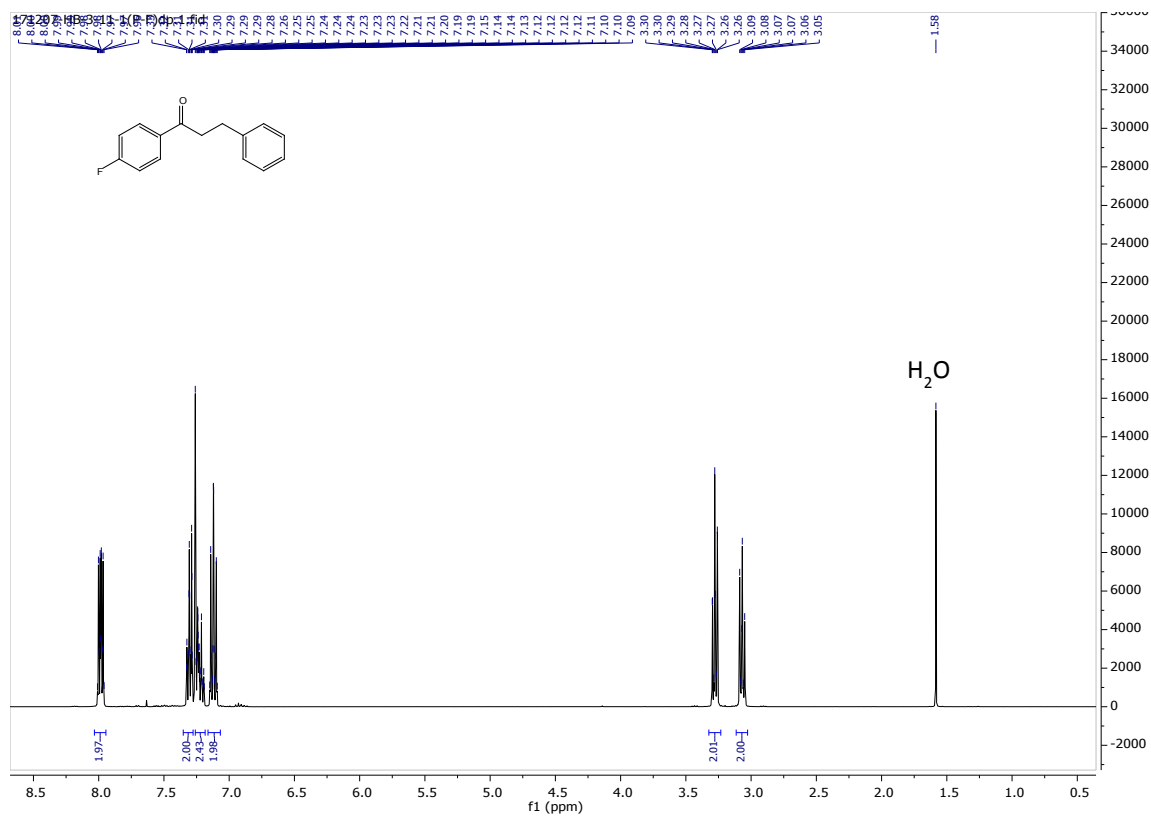



### 3ia <sup>1</sup>H NMR (400 MHz, Chloroform-*d*)

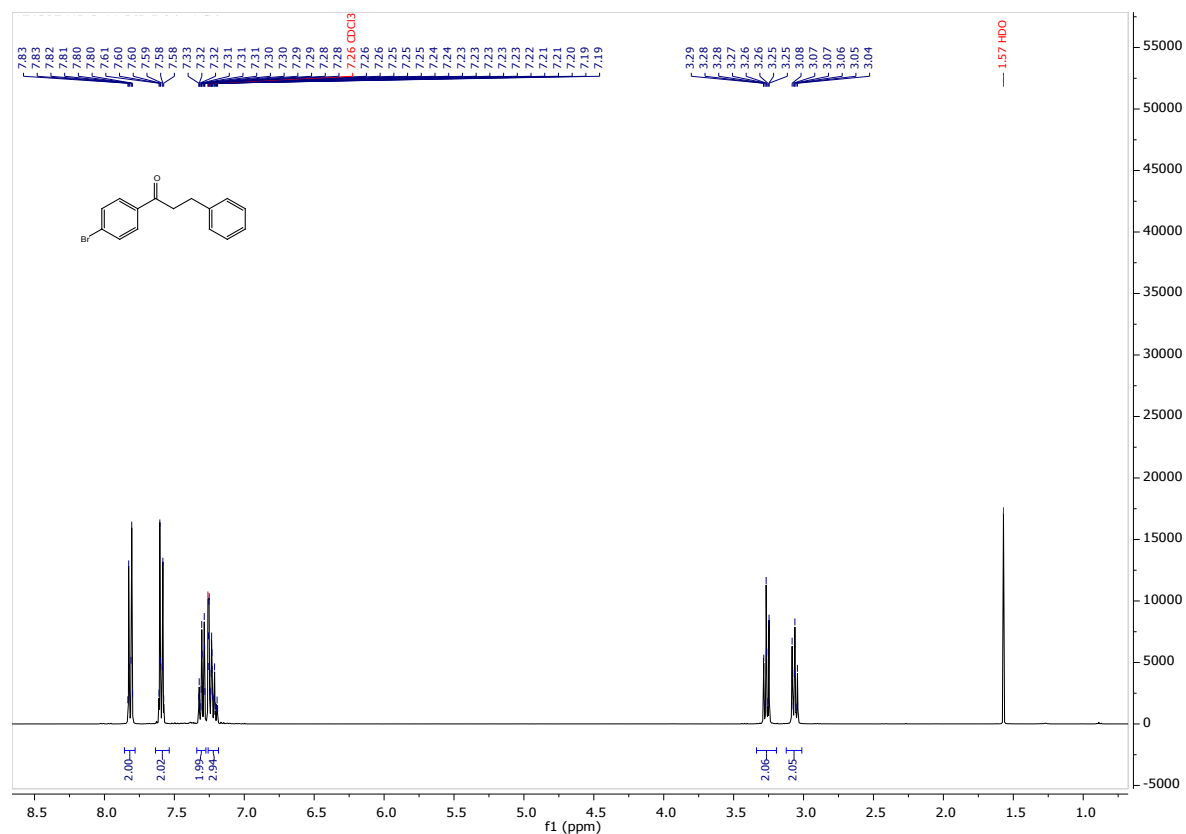

### 3ia <sup>13</sup>C {<sup>1</sup>H} NMR (101 MHz, Chloroform-*d*)

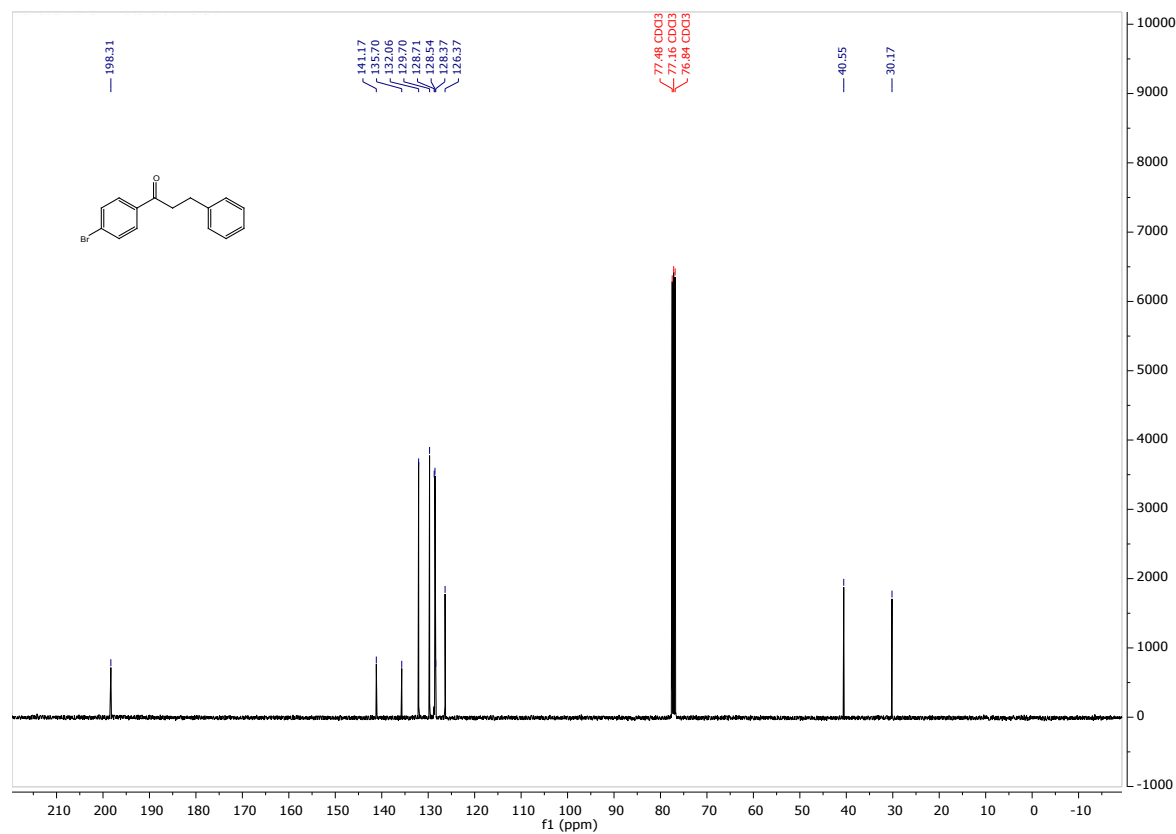

### 3ja <sup>1</sup>H NMR (400 MHz, Chloroform-*d*)

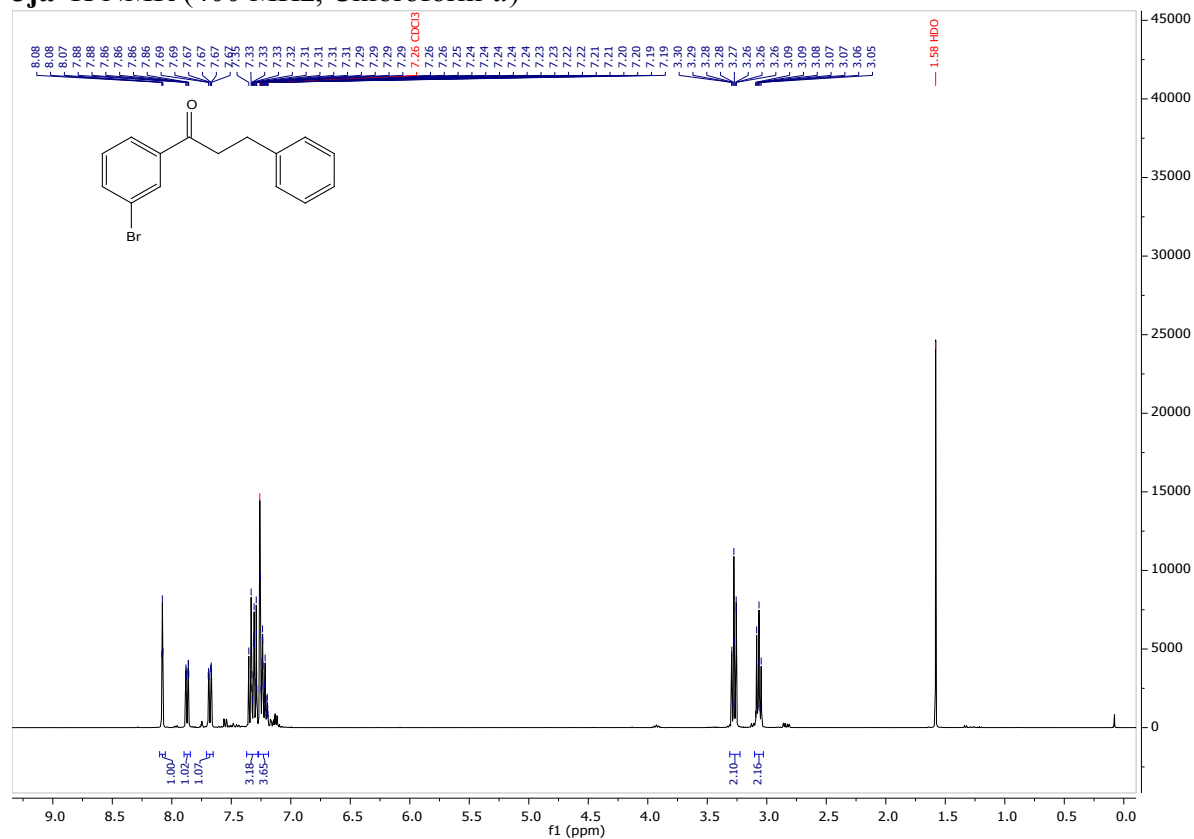

### 3ja <sup>13</sup>C {<sup>1</sup>H} NMR (101 MHz, Chloroform-*d*)

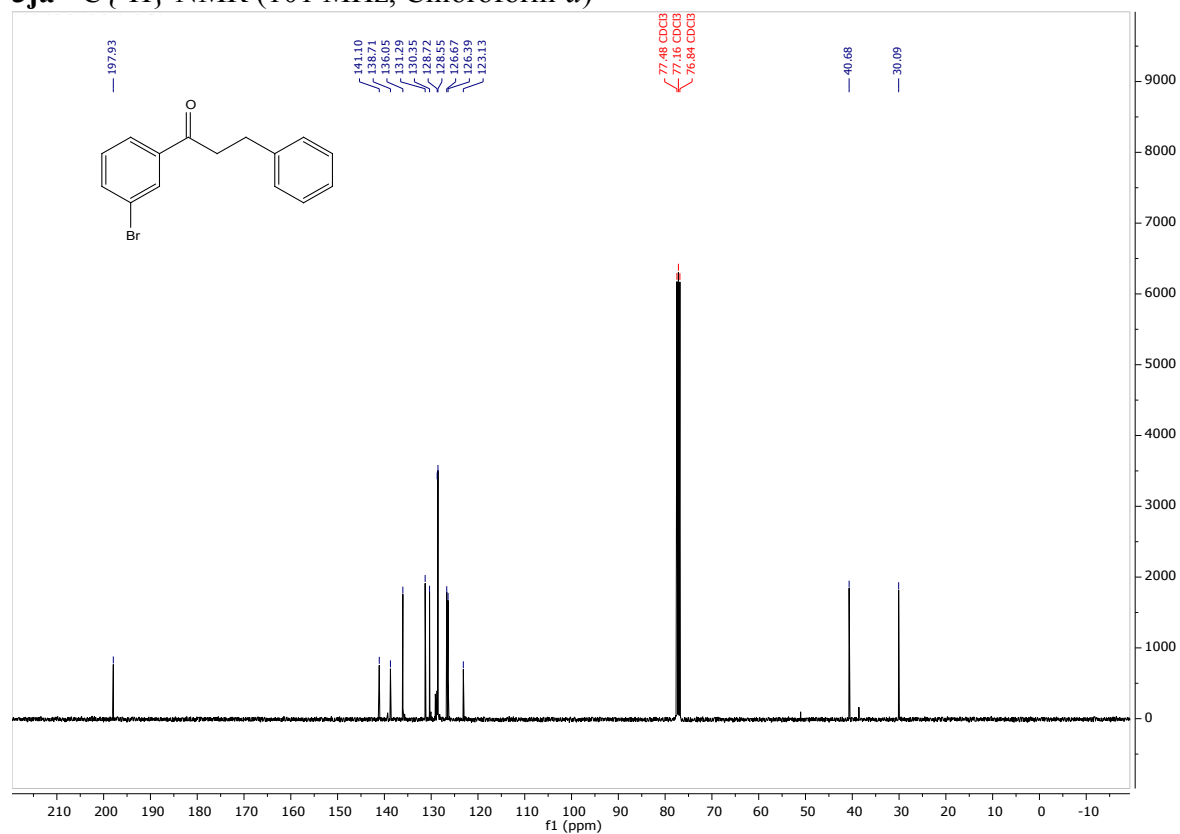

**3ka**  $^1\text{H}$  NMR (400 MHz, Chloroform-*d*)

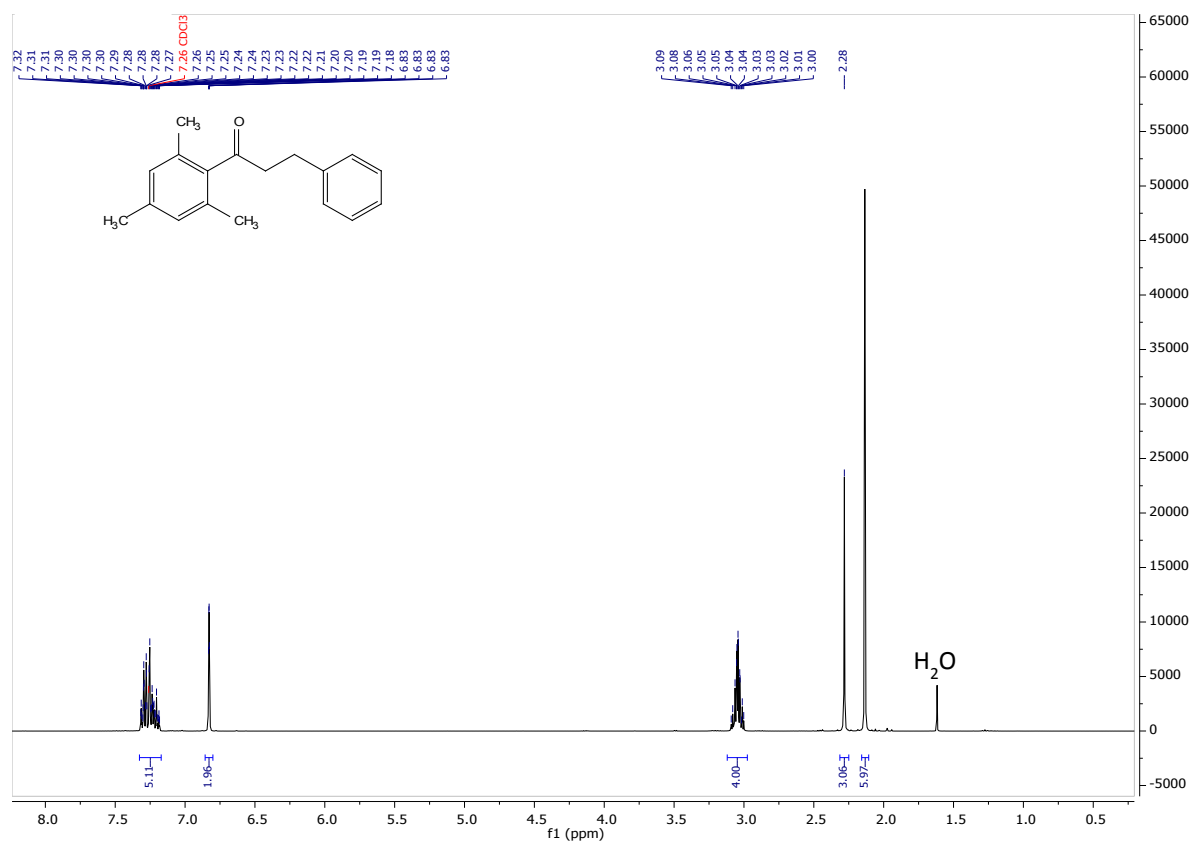

**3ka**  $^{13}\text{C}\{^1\text{H}\}$  NMR (101 MHz, Chloroform-*d*)

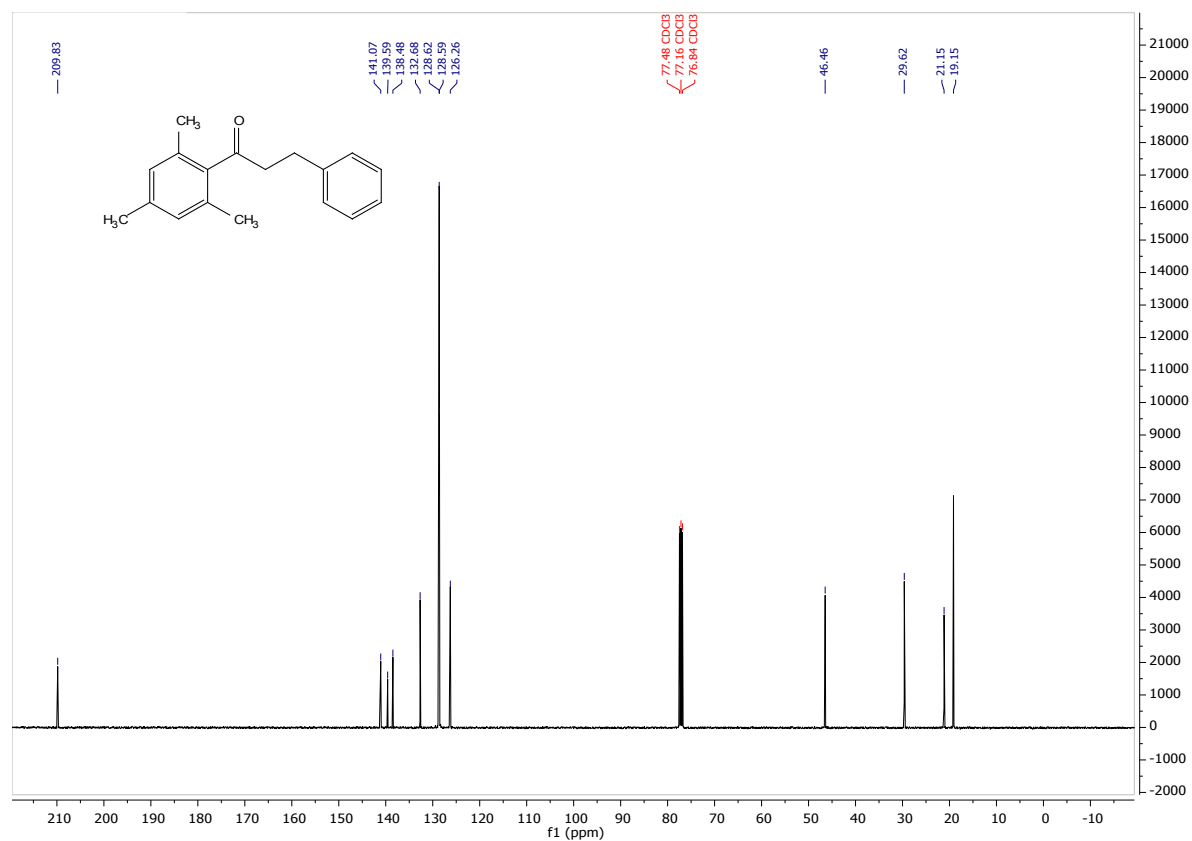

**3ma**  $^1\text{H}$  NMR (400 MHz, Chloroform-*d*)

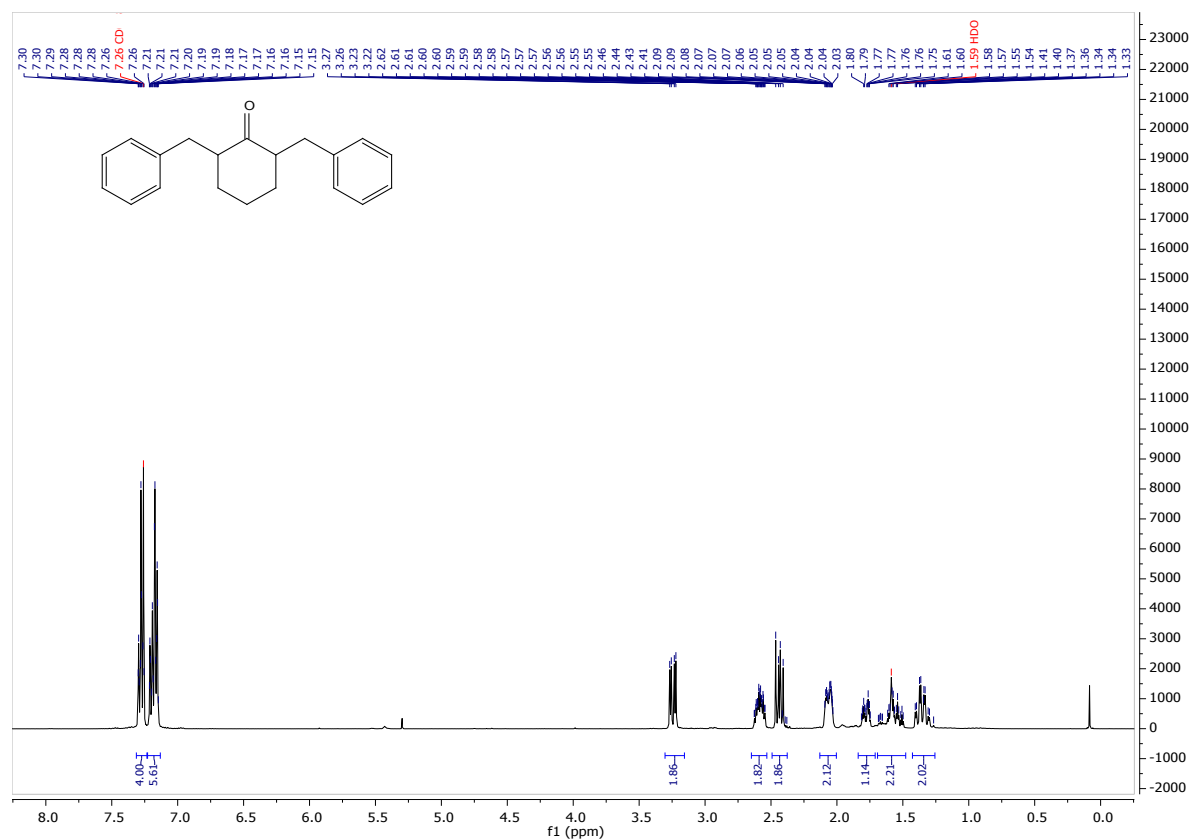

**3ma**  $^{13}\text{C}\{^1\text{H}\}$  NMR (101 MHz, Chloroform-*d*)

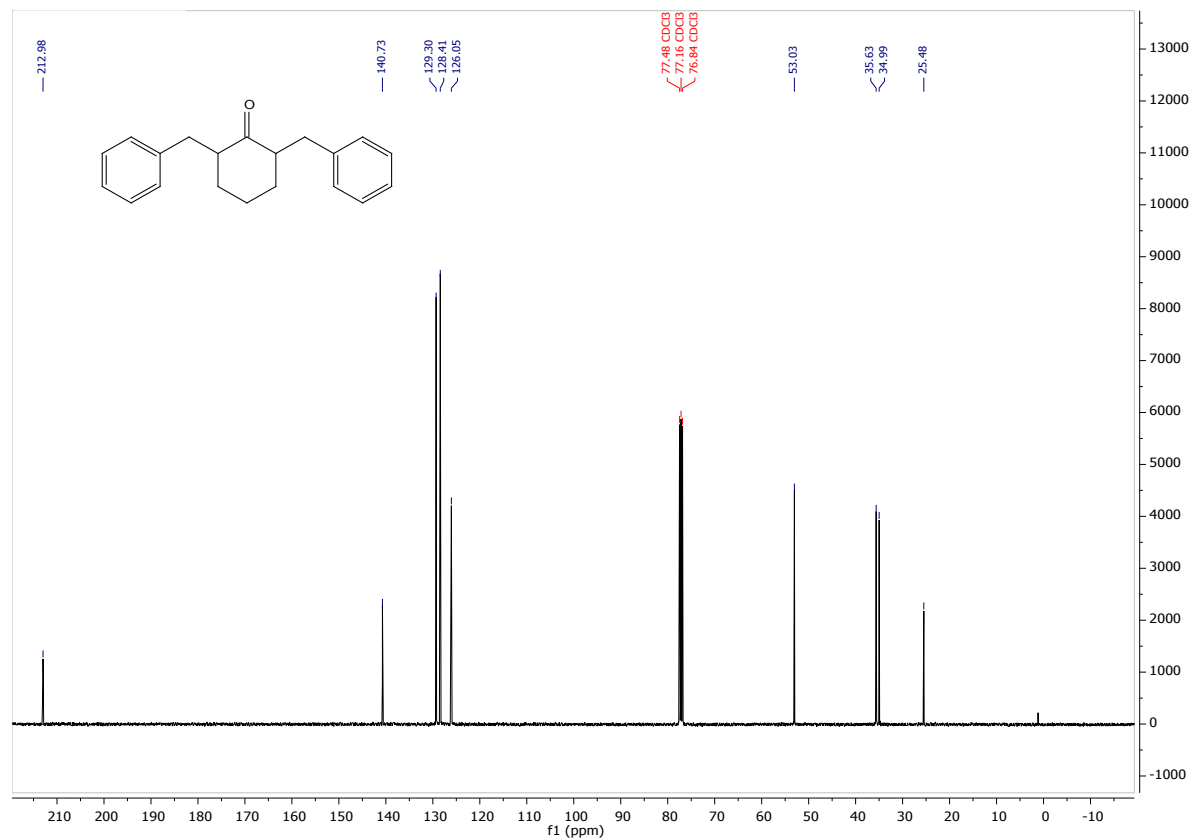



**3oa**  $^1\text{H}$  NMR (400 MHz, Chloroform-*d*)

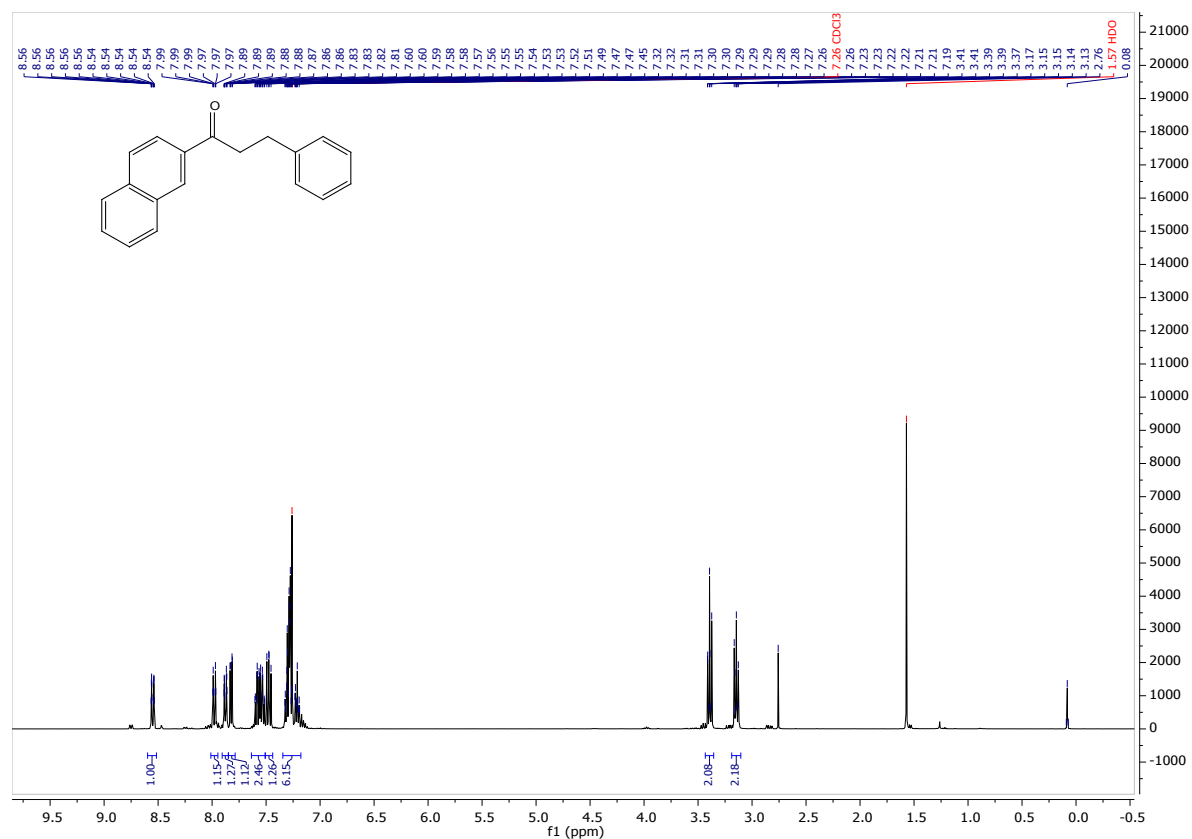

**3oa**  $^{13}\text{C}\{^1\text{H}\}$  NMR (101 MHz, Chloroform-*d*)

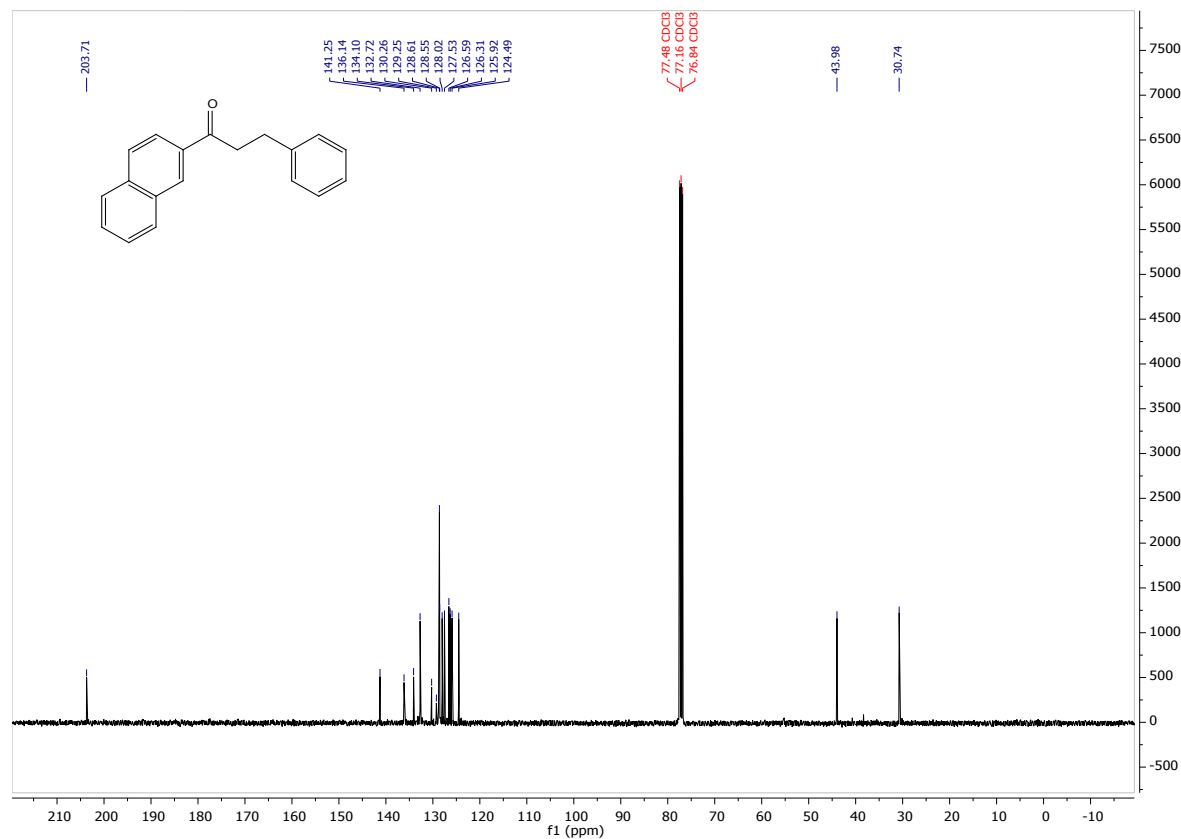



### 3ac <sup>1</sup>H NMR (400 MHz, Chloroform-*d*)

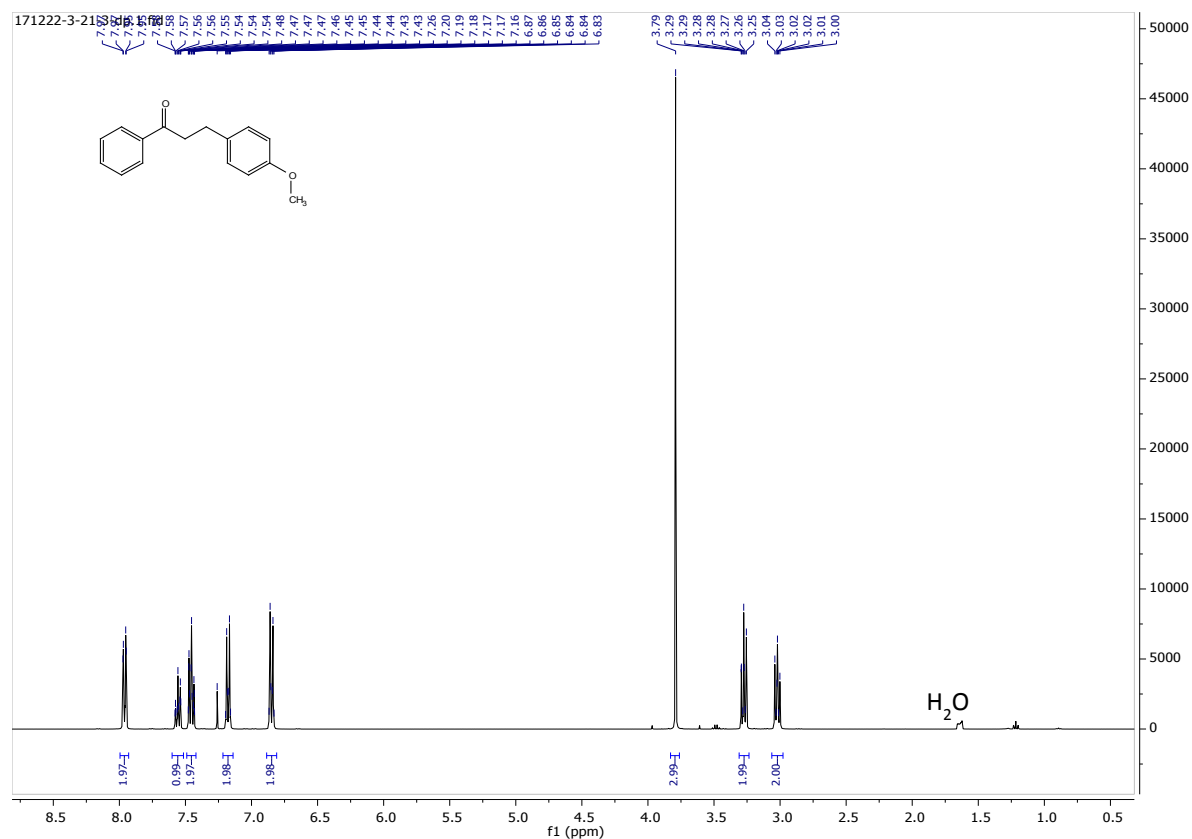



**3ad**  $^1\text{H}$  NMR (400 MHz, Chloroform-*d*)

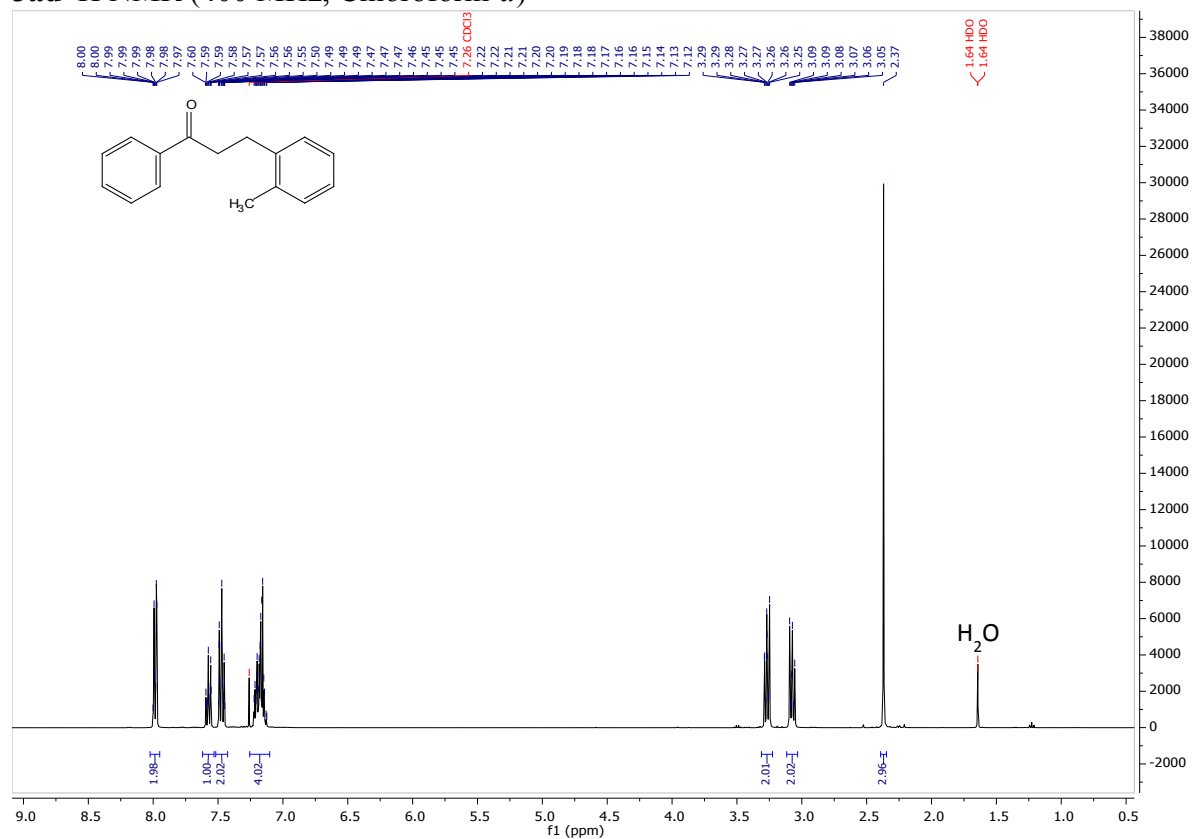

**3ad**  $^{13}\text{C}\{^1\text{H}\}$  NMR (101 MHz, Chloroform-*d*)

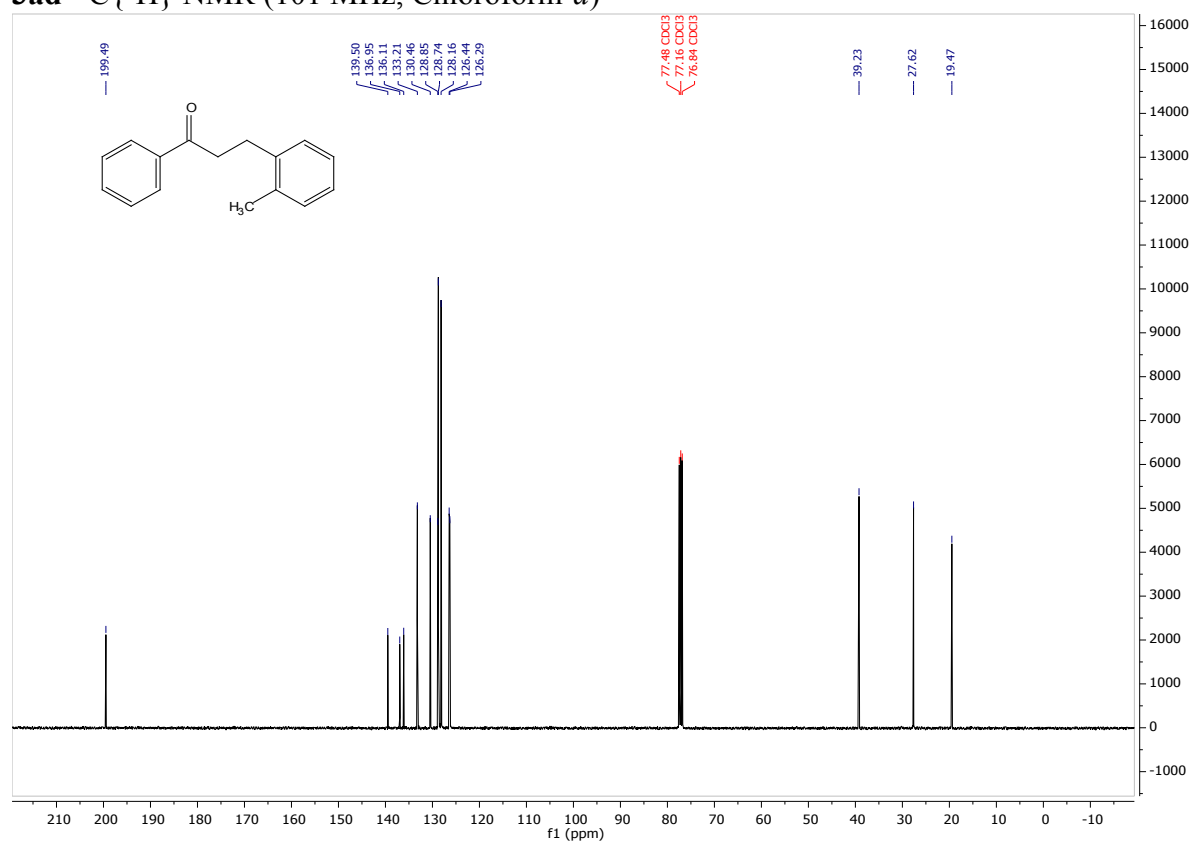

### 3ae <sup>1</sup>H NMR (400 MHz, Chloroform-*d*)

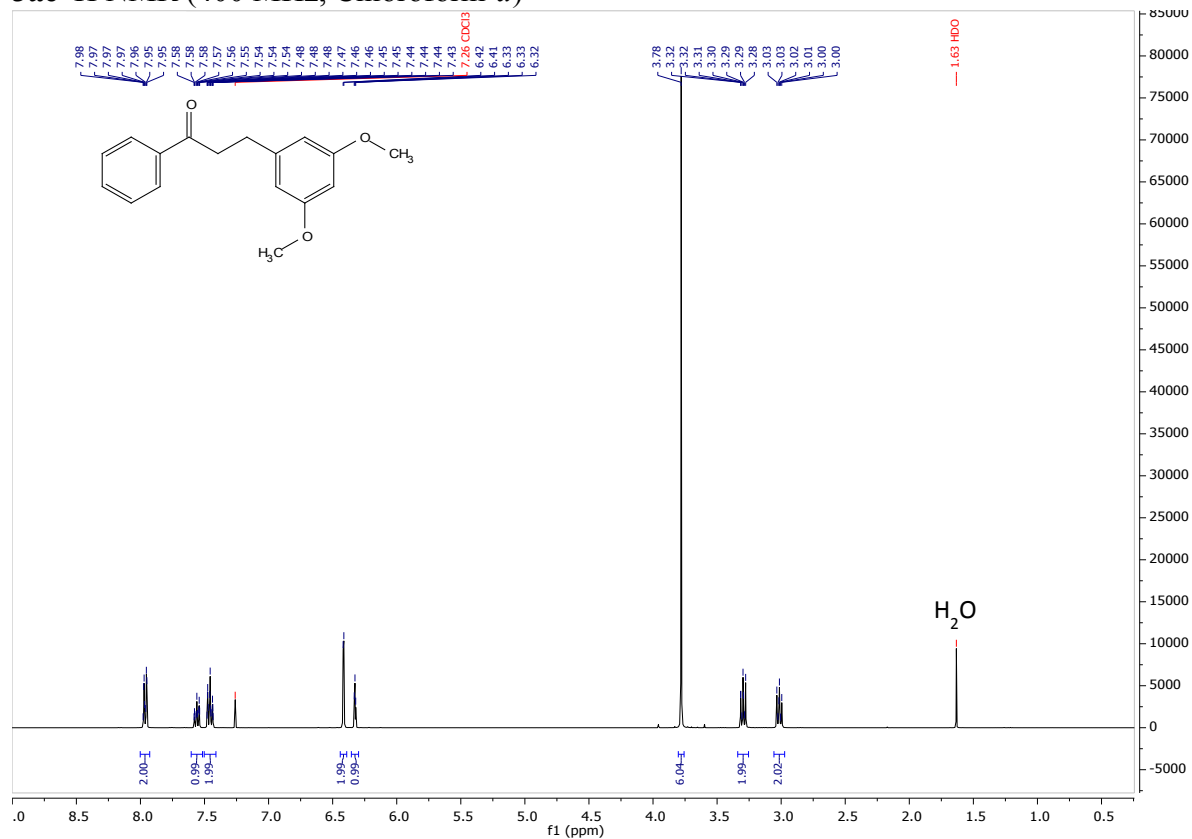

### 3ae <sup>13</sup>C {<sup>1</sup>H} NMR (101 MHz, Chloroform-*d*)

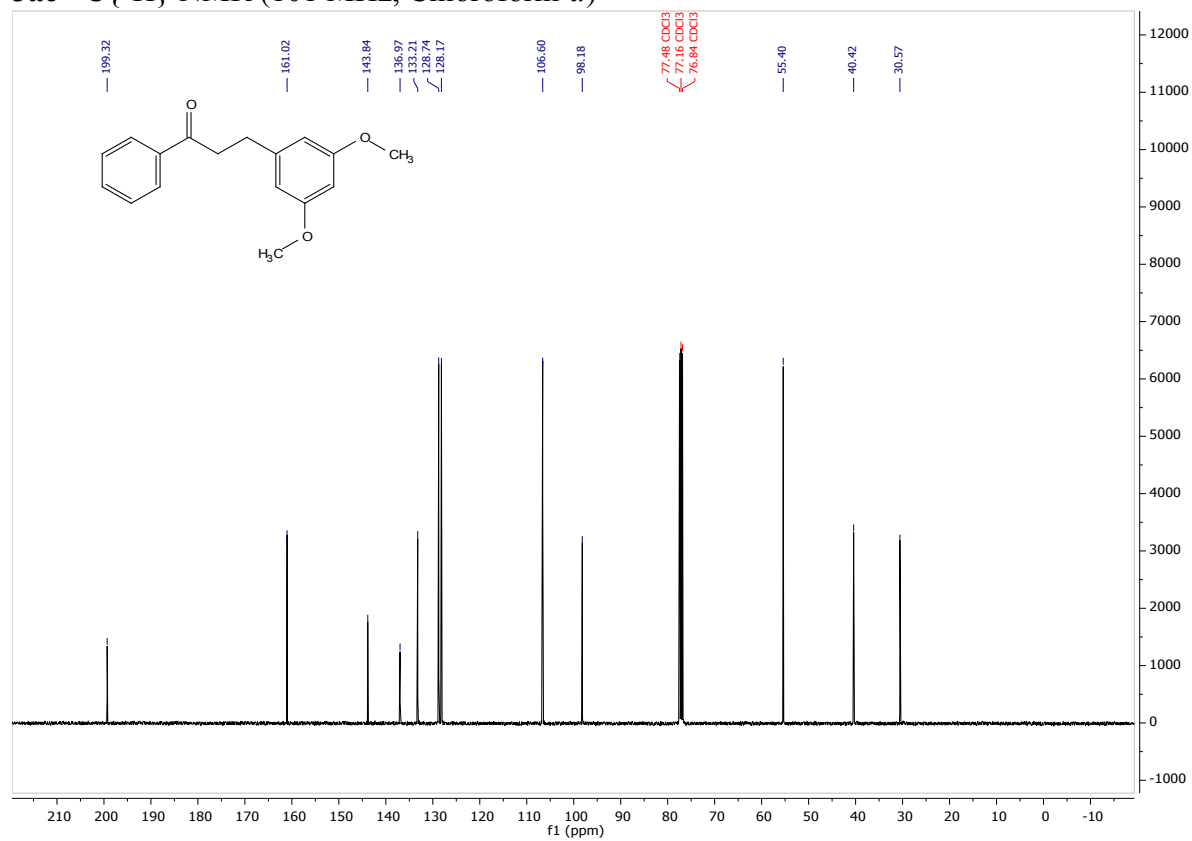





**3ah**  $^1\text{H}$  NMR (400 MHz, Chloroform-*d*)

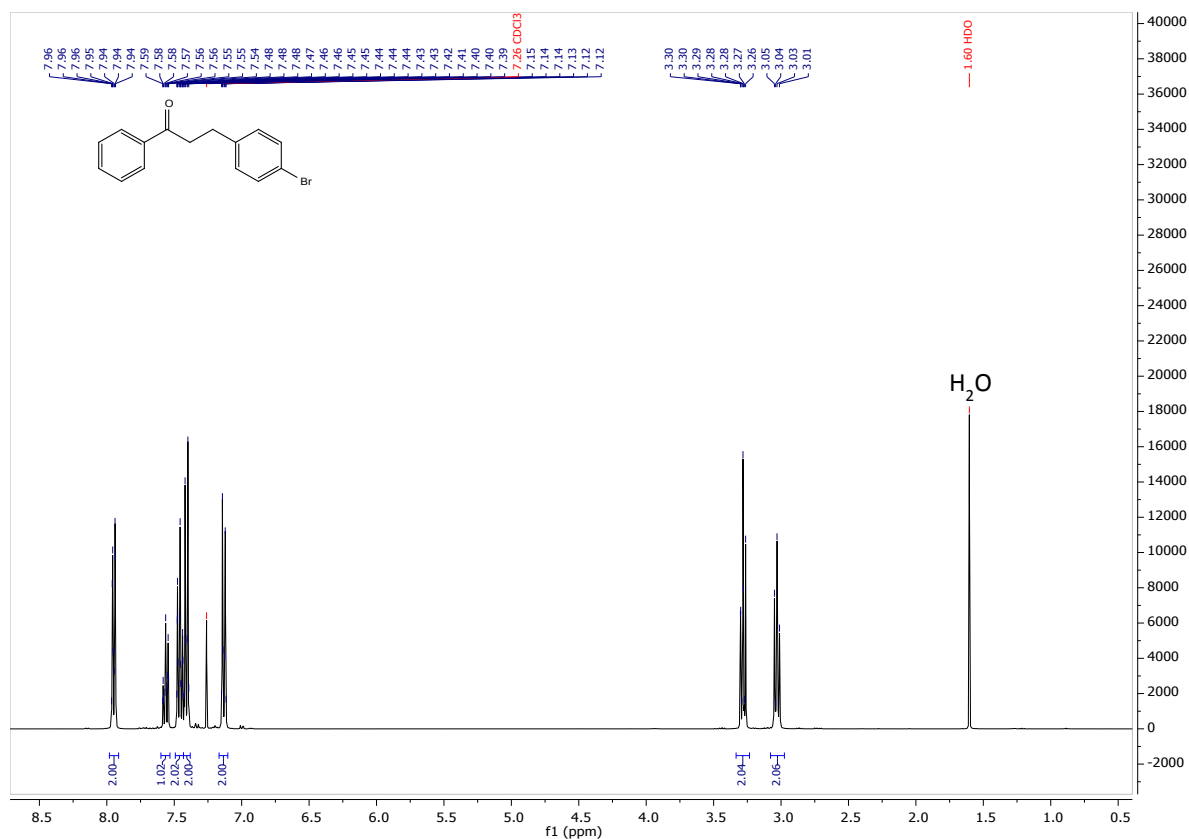

**3ah**  $^{13}\text{C}\{^1\text{H}\}$  NMR (101 MHz, Chloroform-*d*)

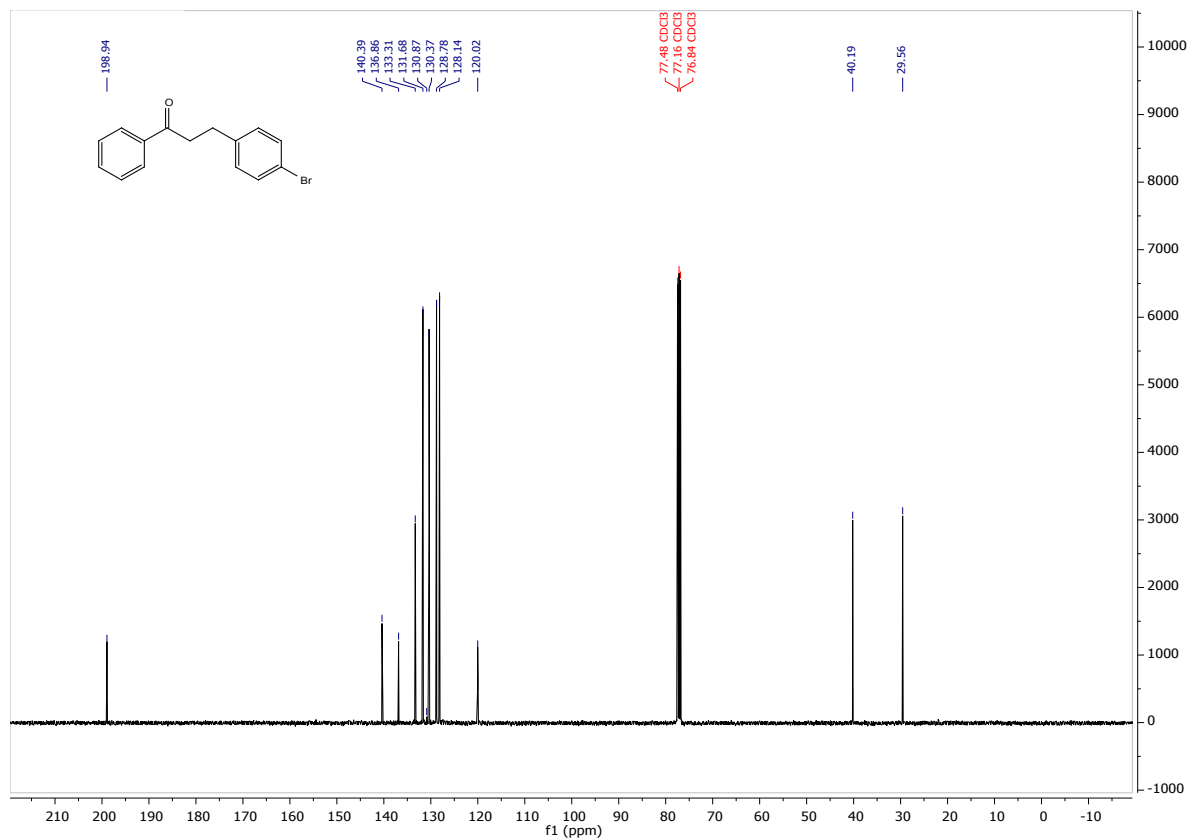

### 3aj <sup>1</sup>H NMR (400 MHz, Chloroform-*d*)

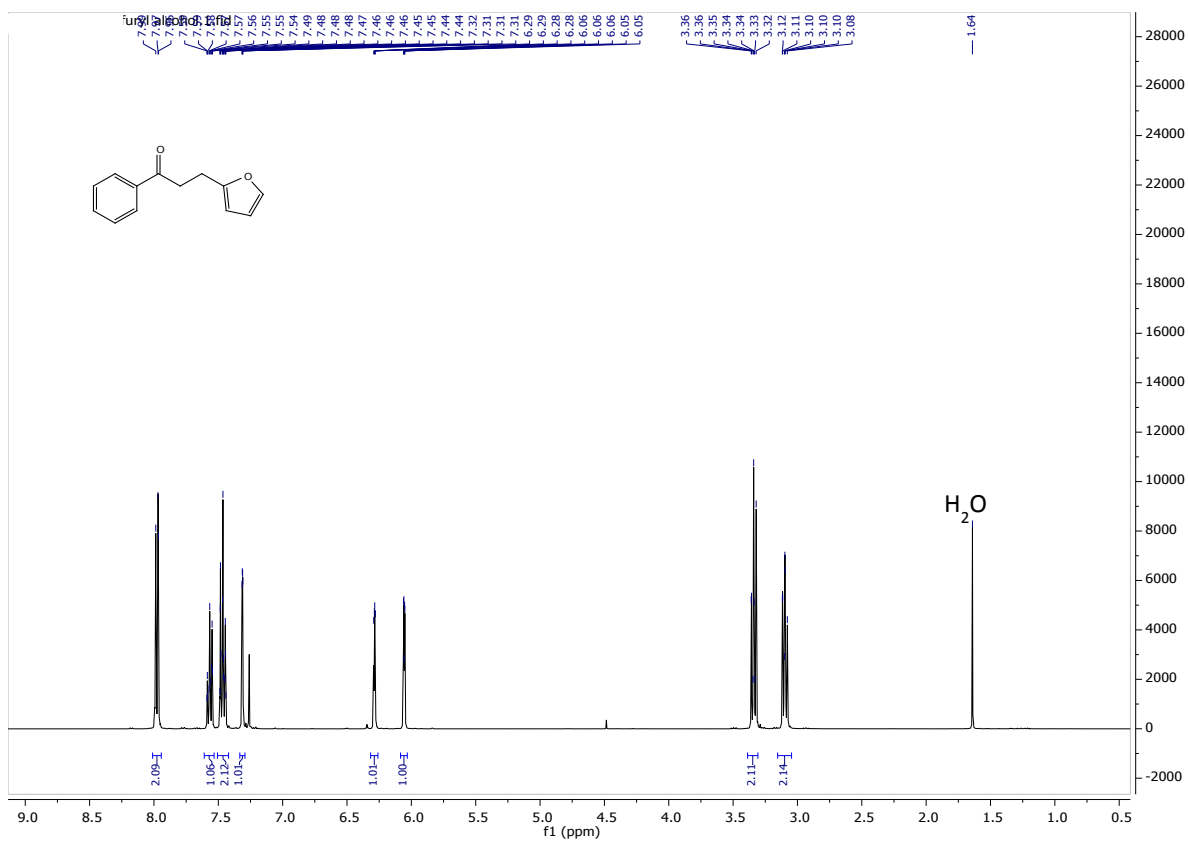

### 3aj <sup>13</sup>C {<sup>1</sup>H} NMR (101 MHz, Chloroform-*d*)

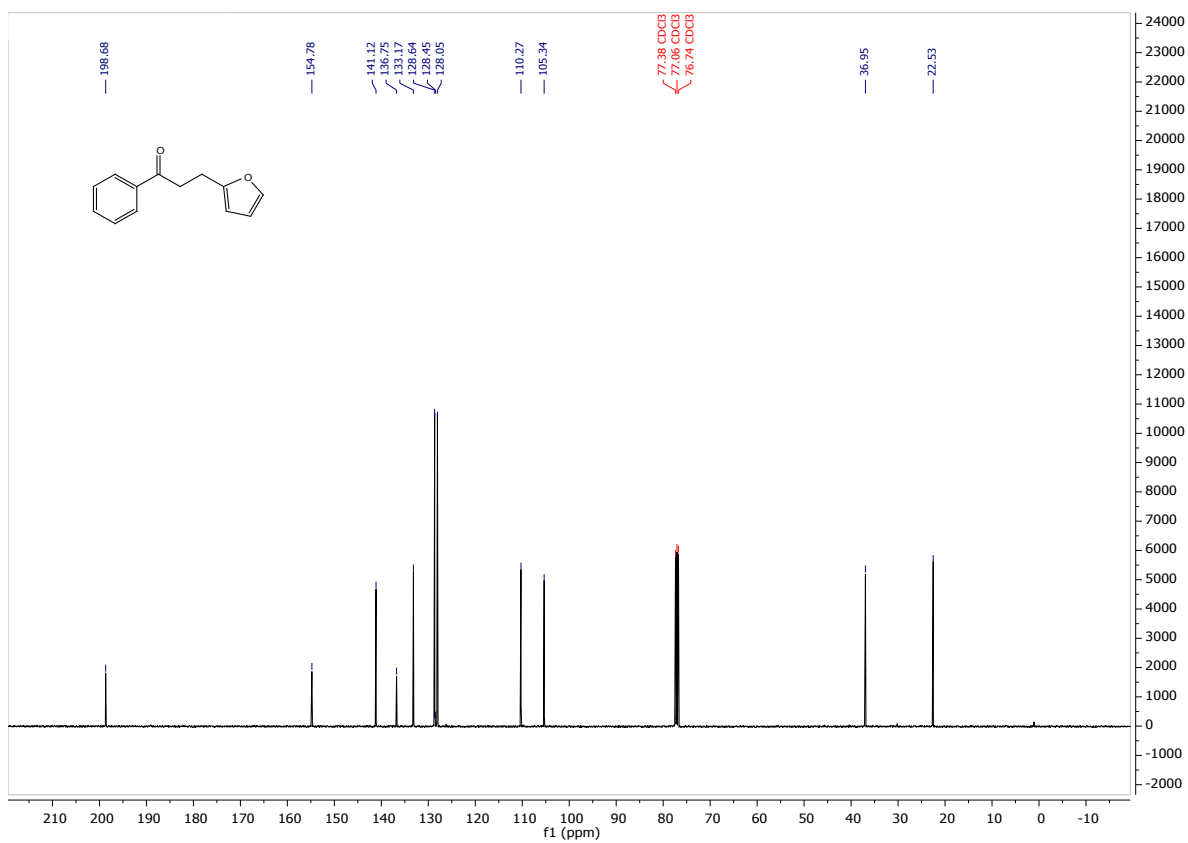

### 3ak <sup>1</sup>H NMR (400 MHz, Chloroform-*d*)

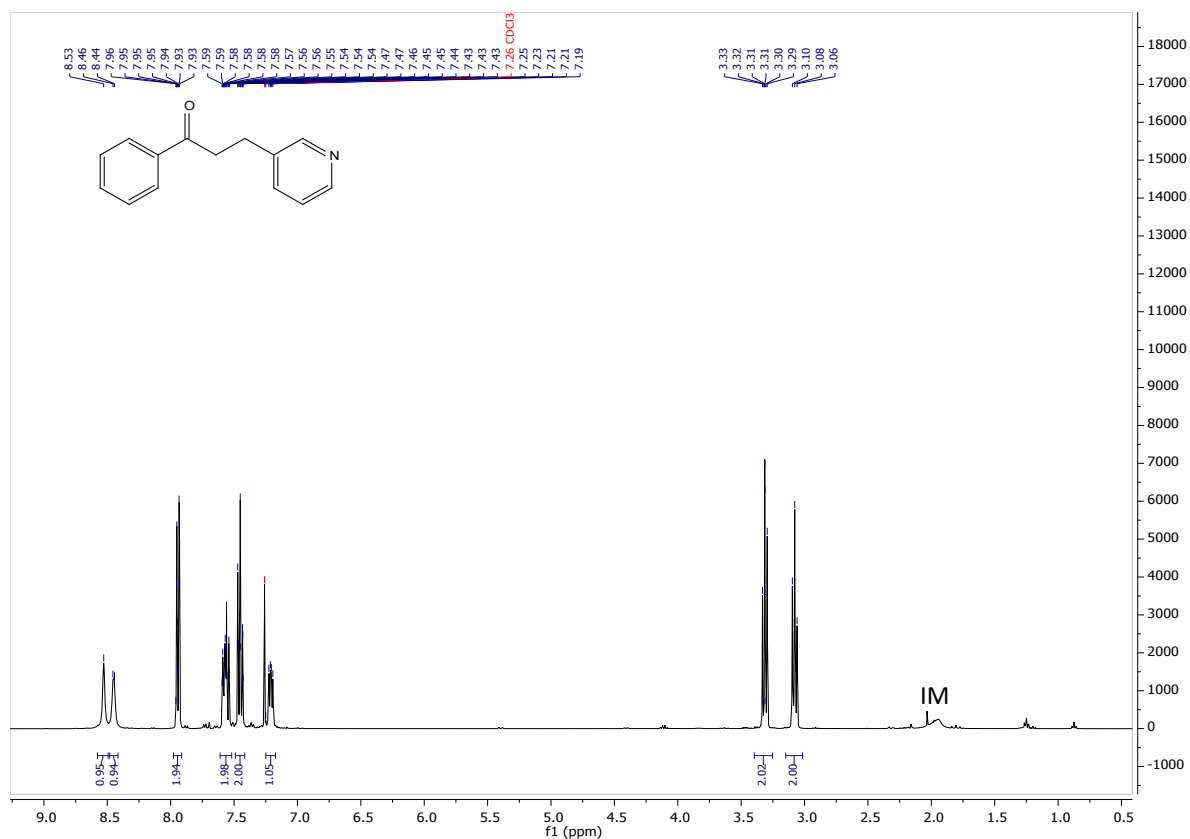

### 3ak <sup>13</sup>C{<sup>1</sup>H} NMR (101 MHz, Chloroform-*d*)

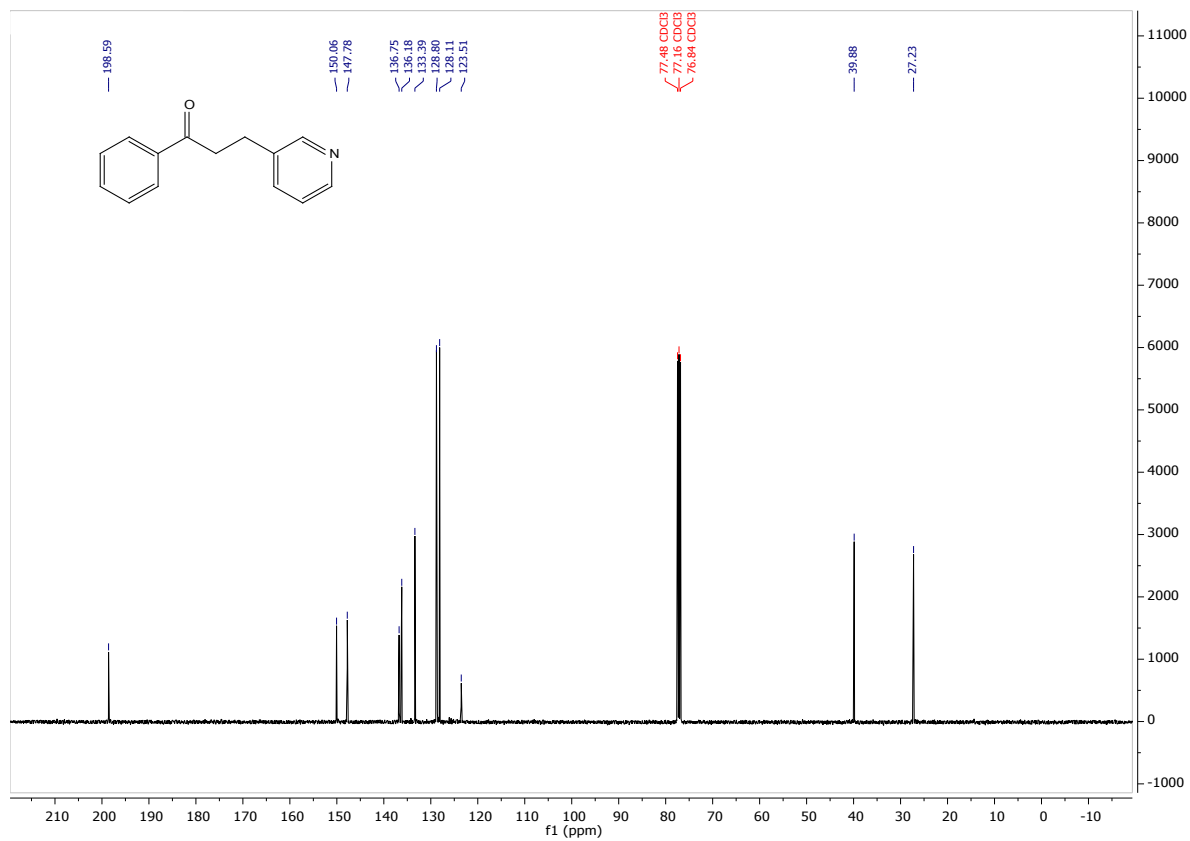

**3al**  $^1\text{H}$  NMR (400 MHz, Chloroform-*d*)

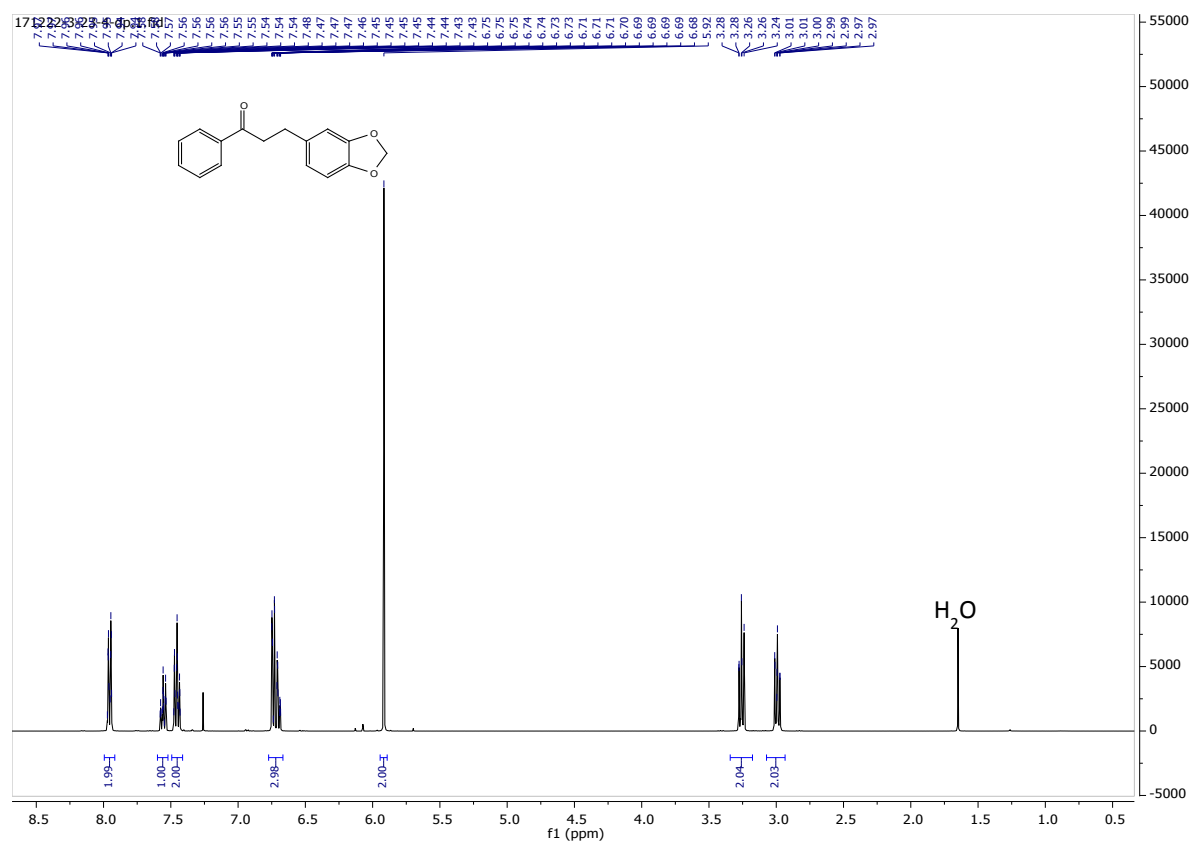

**3al**  $^{13}\text{C}$  { $^1\text{H}$ } NMR (101 MHz, Chloroform-*d*)

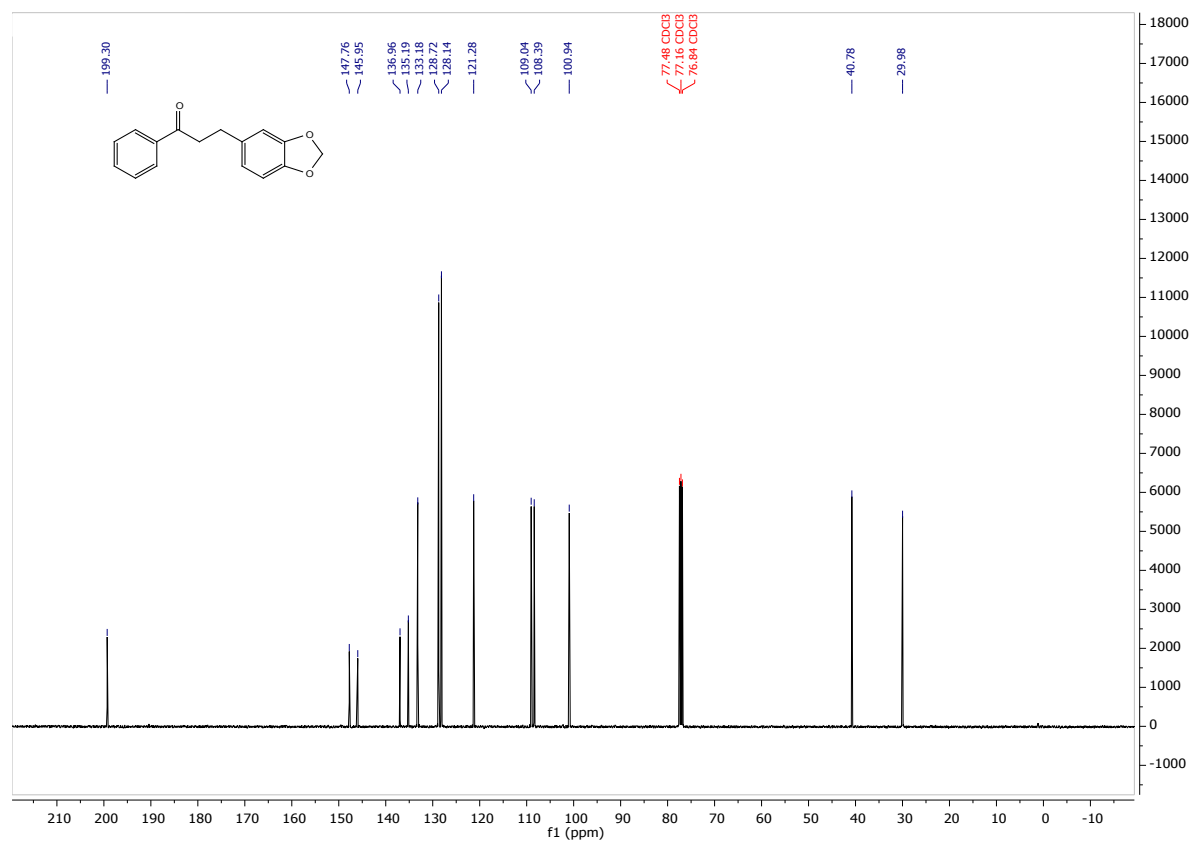





**3ao**  $^1\text{H}$  NMR (400 MHz, Chloroform-*d*)

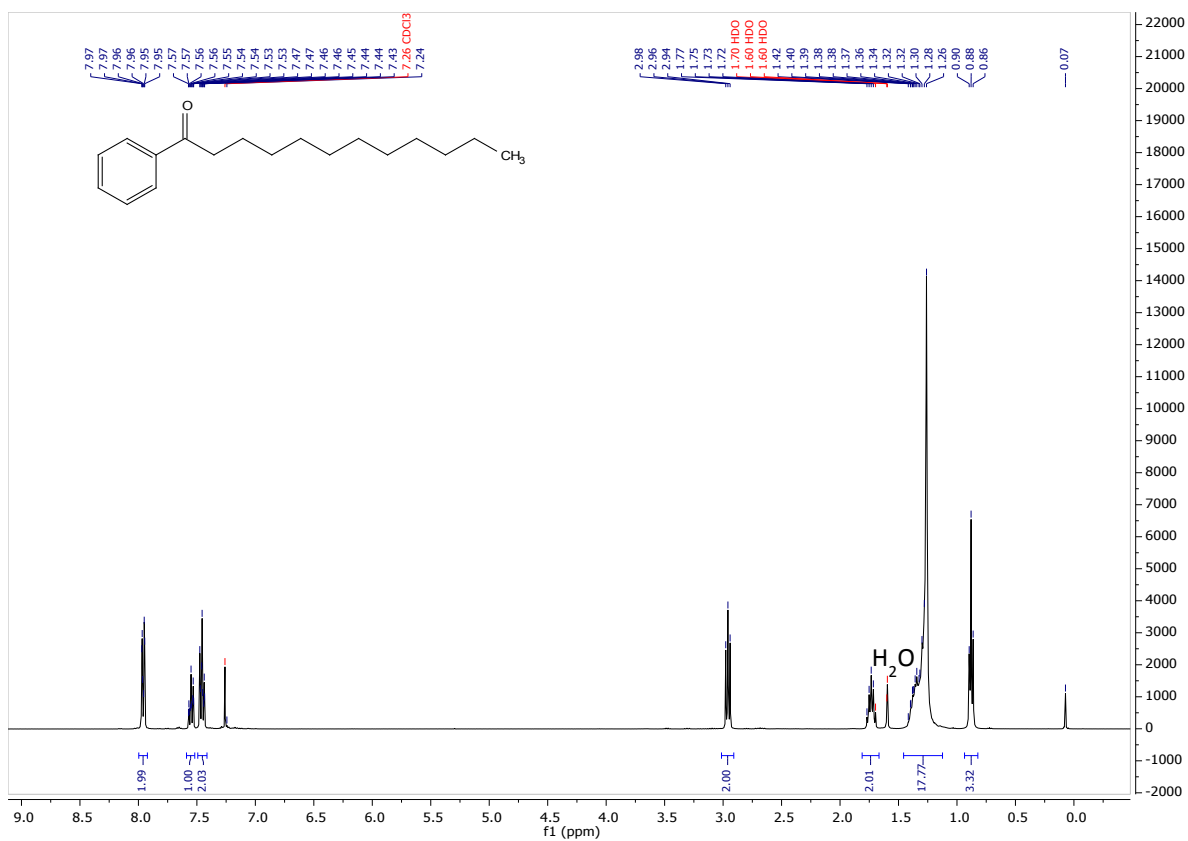

**3ao**  $^{13}\text{C}\{^1\text{H}\}$  NMR (101 MHz, Chloroform-*d*)

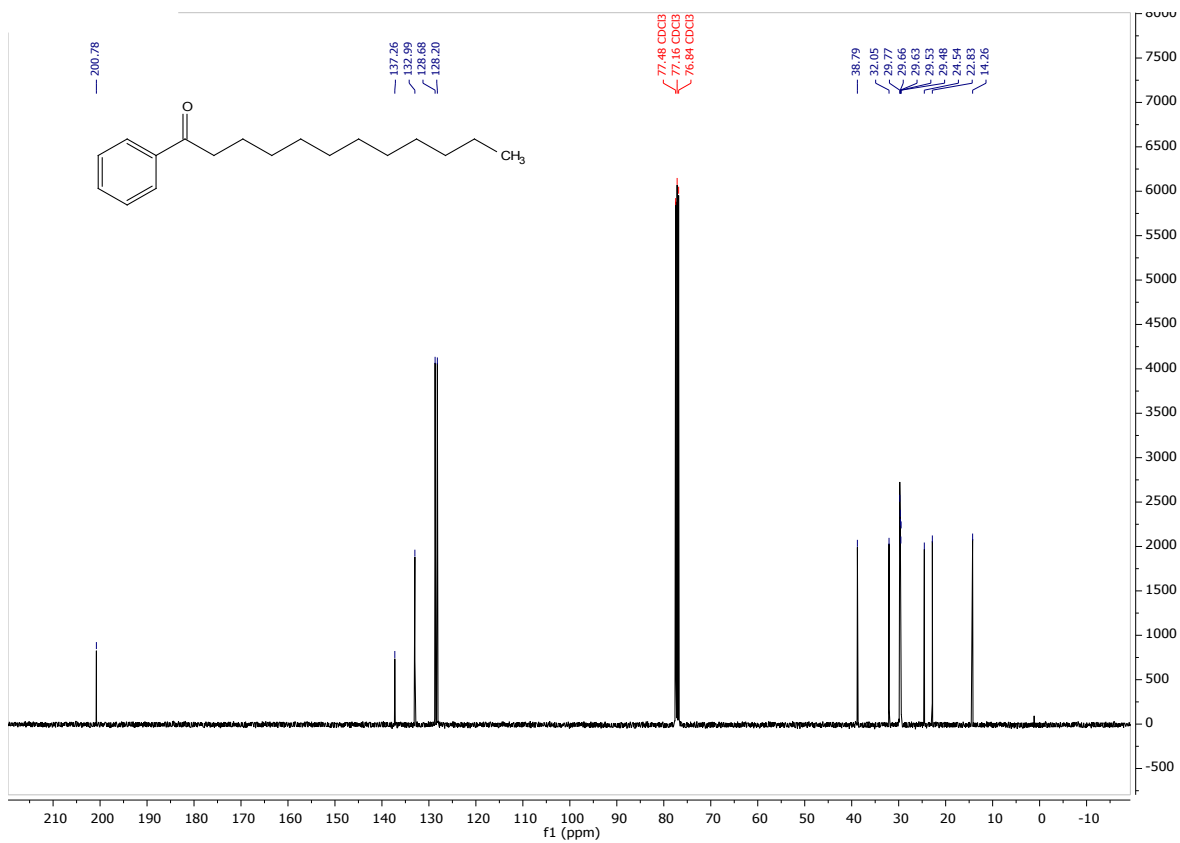

### S1.9.3 Scope for the alkylated alcohols

#### 4a $^1\text{H}$ NMR (400 MHz, Chloroform-*d*)

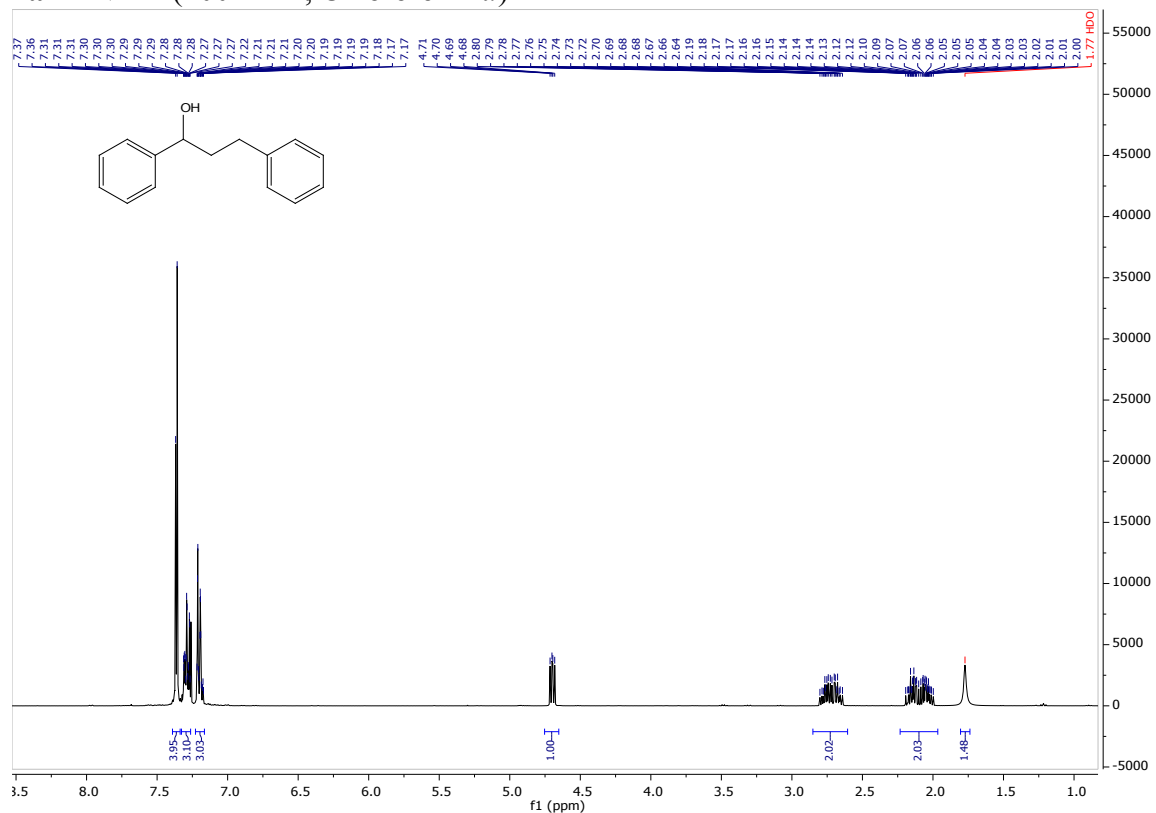

#### 4a $^{13}\text{C}\{^1\text{H}\}$ NMR (101 MHz, Chloroform-*d*)

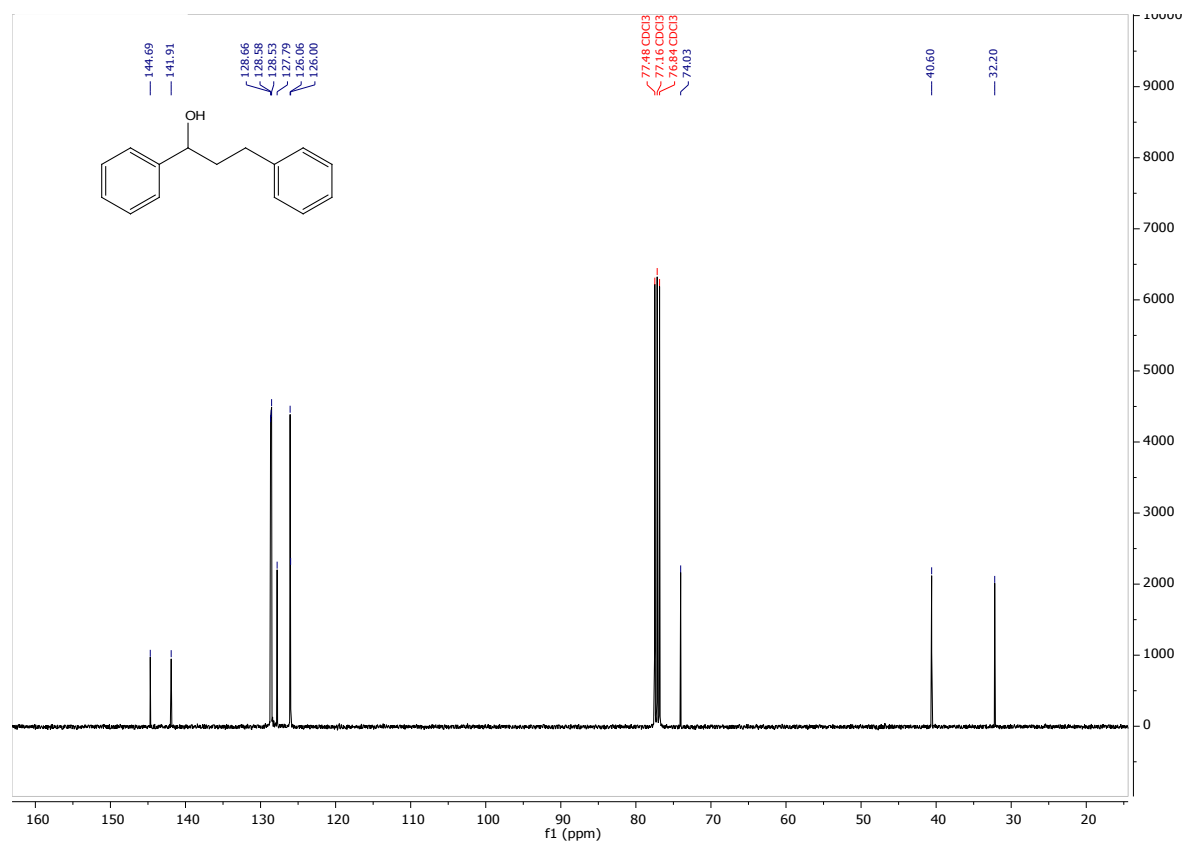

**4b**  $^1\text{H}$  NMR (400 MHz, Chloroform-*d*)

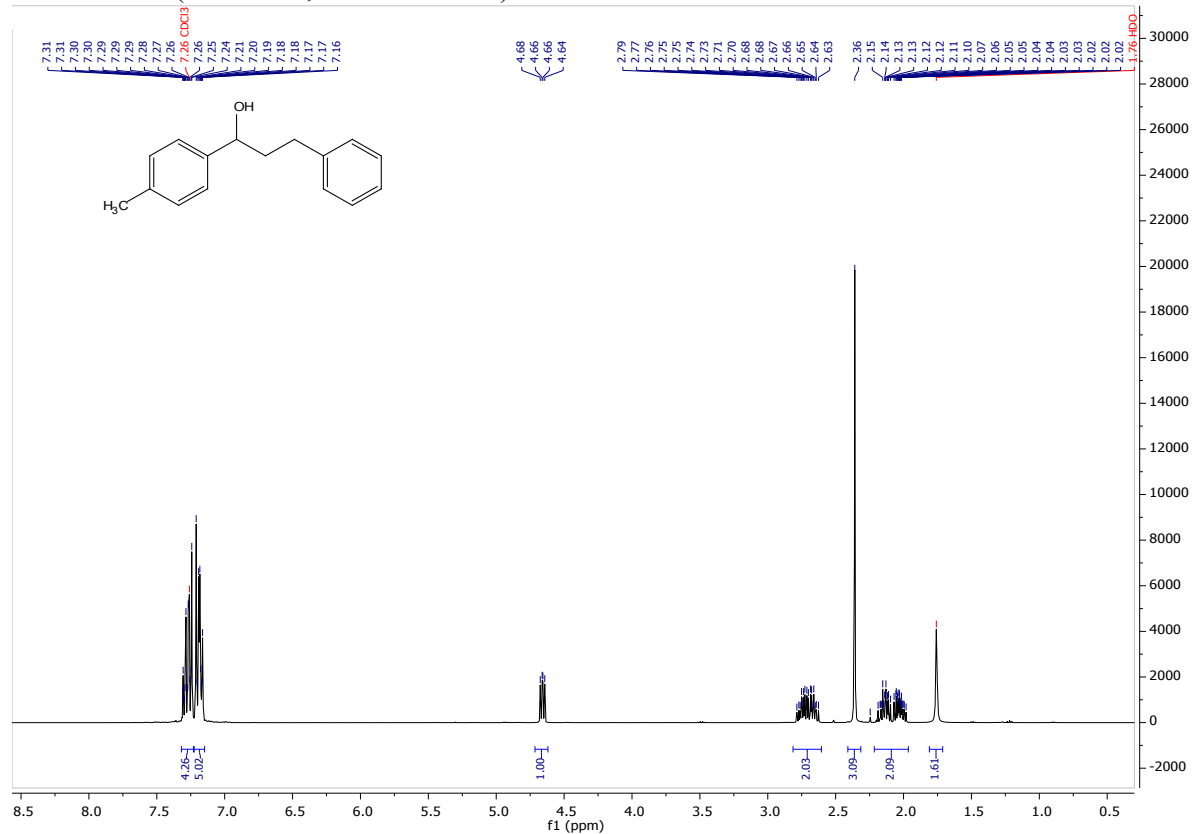

**4b**  $^{13}\text{C}\{^1\text{H}\}$  NMR (101 MHz, Chloroform-*d*)

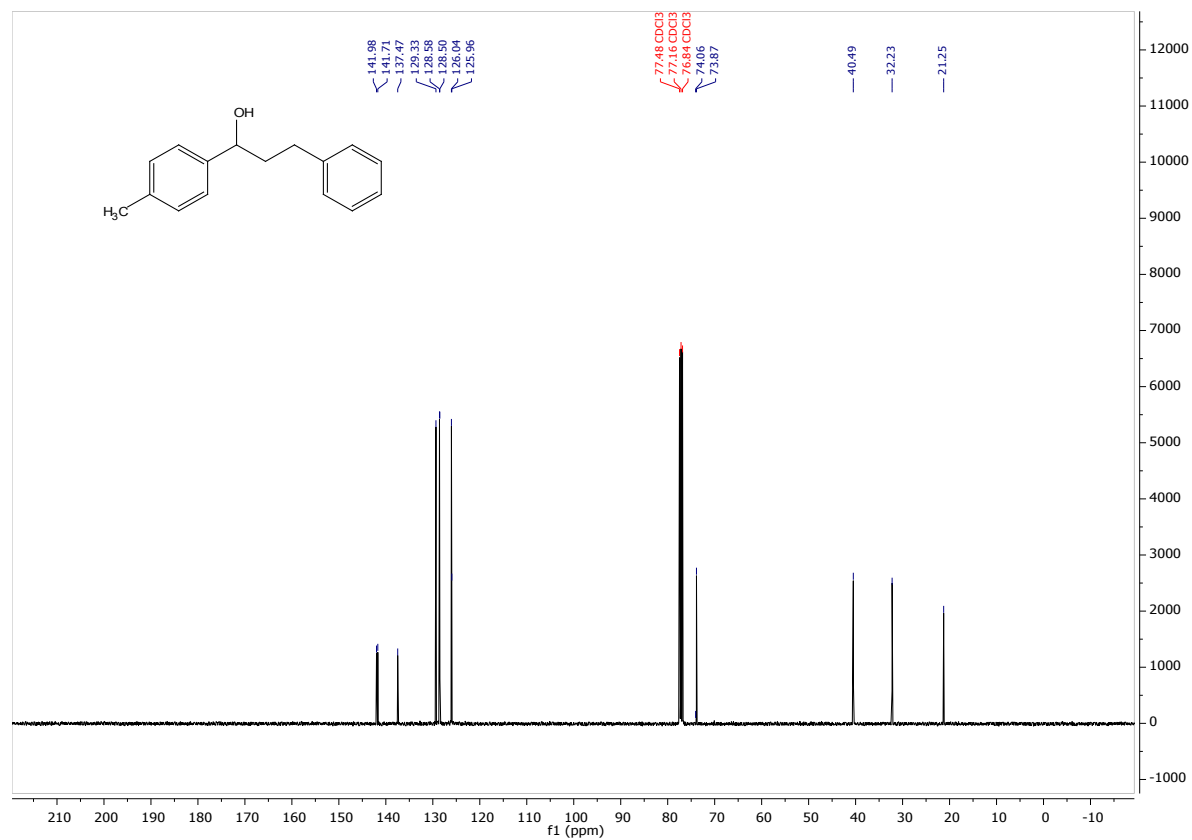

**4d**  $^1\text{H}$  NMR (400 MHz, Chloroform-*d*)

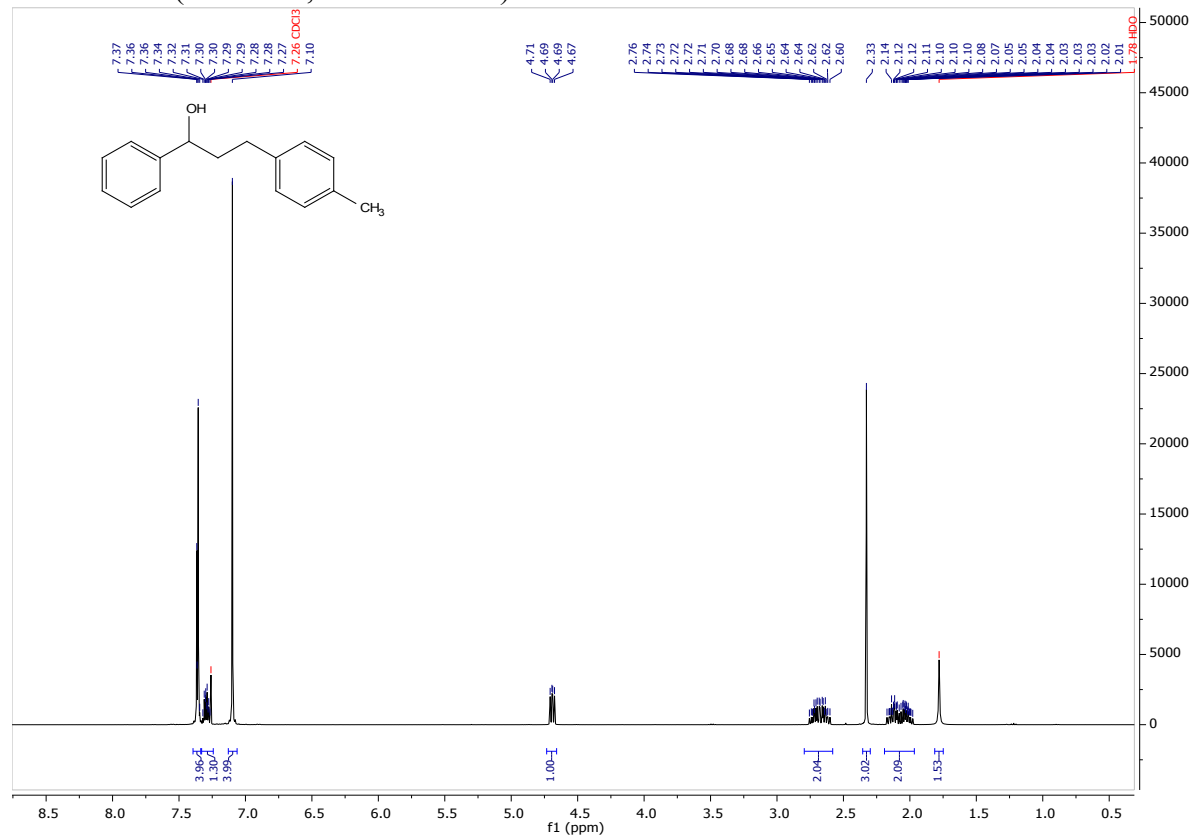

**4d**  $^{13}\text{C}\{^1\text{H}\}$  NMR (101 MHz, Chloroform-*d*)

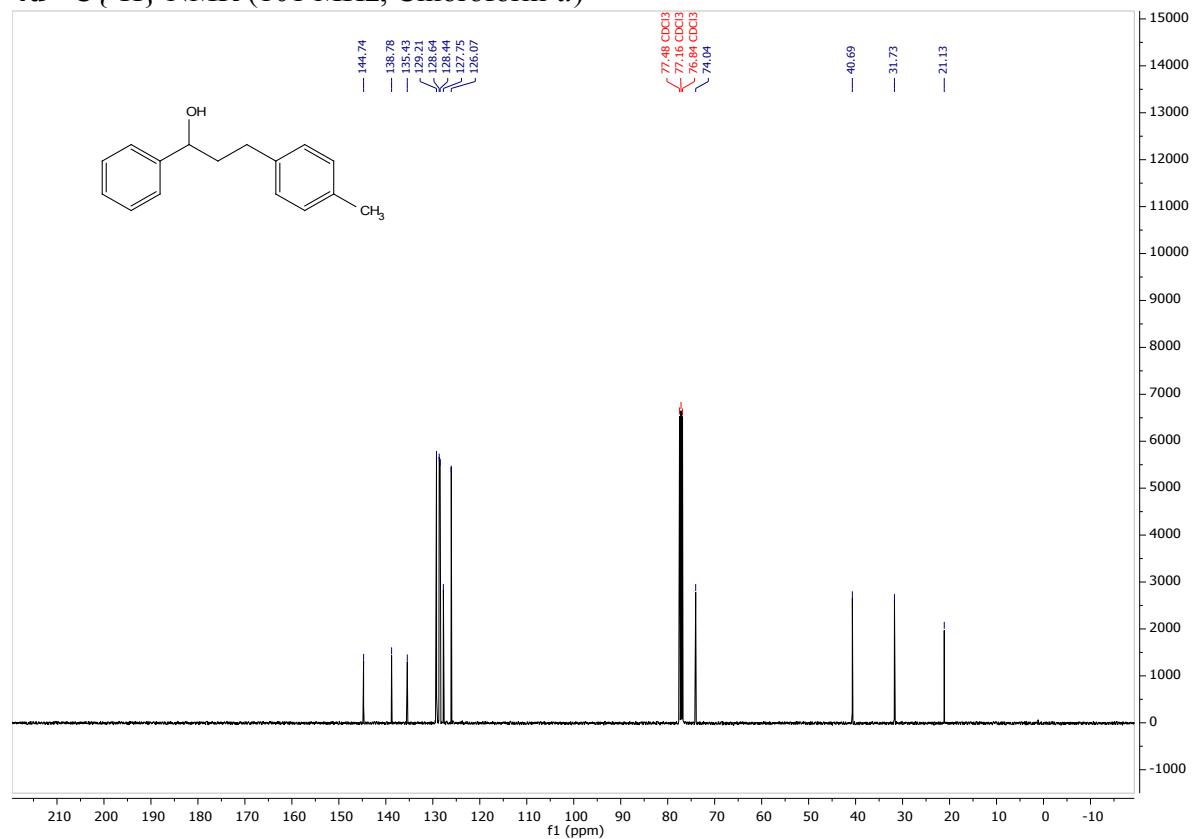



**4g**  $^1\text{H}$  NMR (400 MHz, Chloroform-*d*)

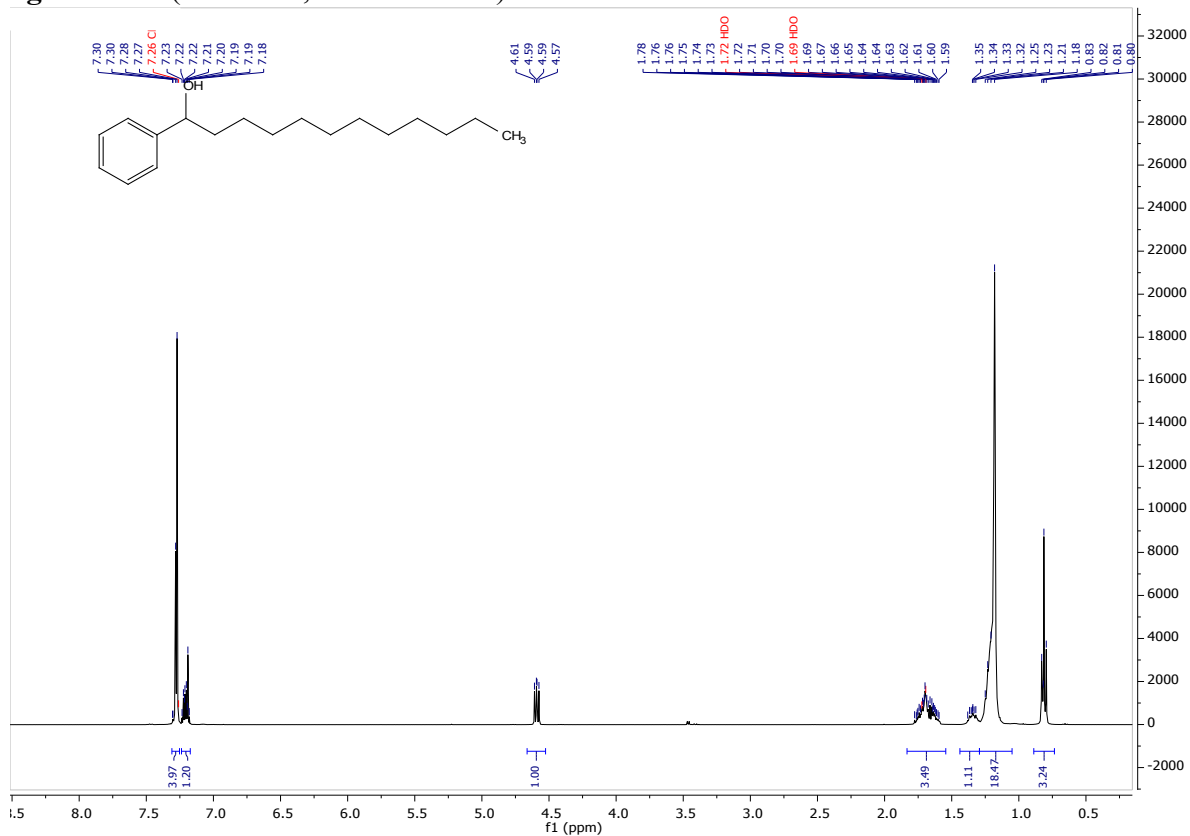

**4g**  $^{13}\text{C}\{^1\text{H}\}$  NMR (101 MHz, Chloroform-*d*)

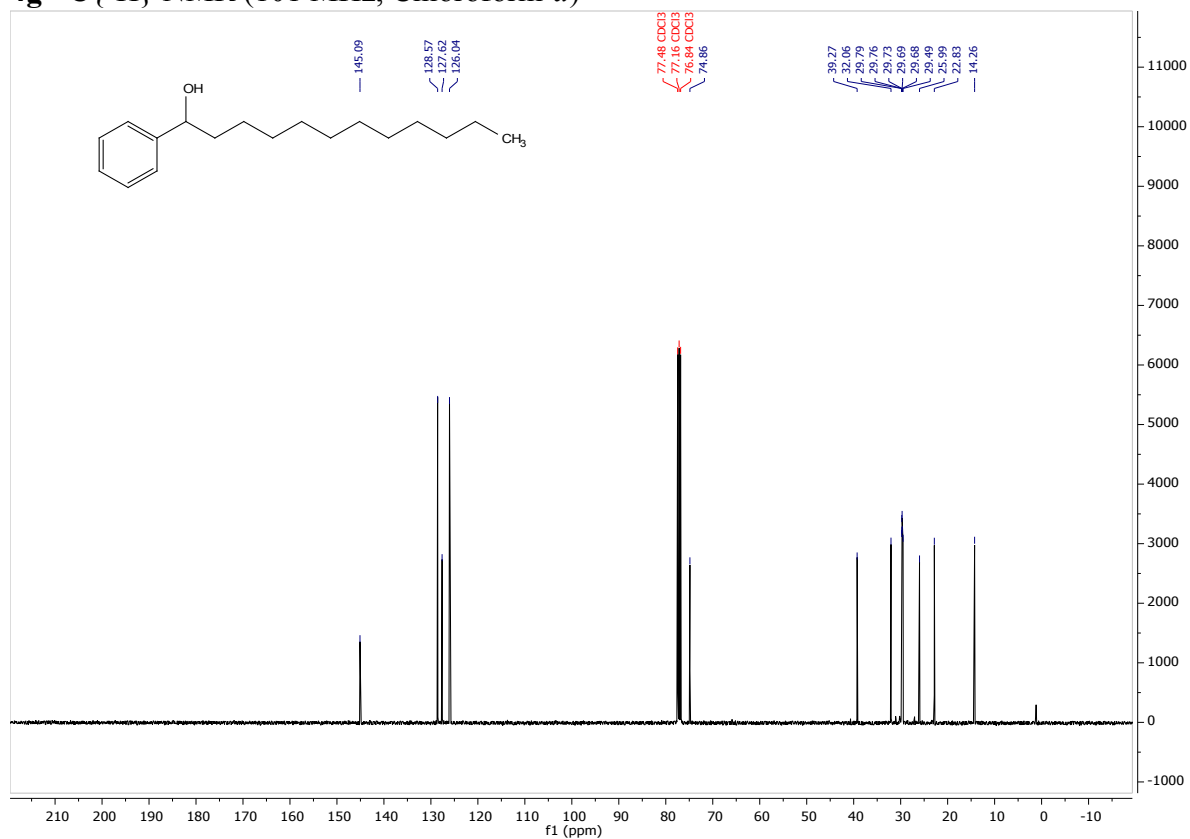

## S1.10 References

1. D. F. Shriver and M. A. Drezdson, *The manipulation of air-sensitive compounds*, John Wiley & Sons, 1986.
2. C. M. Wong, R. T. McBurney, S. C. Binding, M. B. Peterson, V. R. Goncales, J. J. Gooding and B. A. Messerle, *Green Chemistry*, 2017, **19**, 3142-3151.
3. C. M. Wong, M. B. Peterson, I. Pernik, R. T. McBurney and B. A. Messerle, *Inorganic chemistry*, 2017.
4. C. M. Wong, D. B. Walker, A. H. Soeriyadi, J. J. Gooding and B. A. Messerle, *Chemical Science*, 2016, **7**, 1996-2004.
5. F. Alonso, P. Riente and M. Yus, *European Journal of Organic Chemistry*, 2008, **2008**, 4908-4914.
6. J. Barluenga, F. J. Fañanás, R. Sanz, C. Marcos and M. Trabada, *Organic Letters*, 2002, **4**, 1587-1590.
